# Supplementary material for: Preparation and physical properties of early-late heterobimetallic compounds featuring Ir–M bonds (M = Ti, Zr, Hf)
Source: Royal Society of Chemistry journal article supplement (doi:10.1039/c1dt11753j), 2011-10-21
Supplement: c1dt11753j.pdf [file c1dt11753j.pdf]

# Supporting Information for Preparation and Physical Properties of Early-Late Heterobimetallic Compounds Featuring Ir–M Bonds (M = Ti, Zr, Hf)

John J. Curley, Robert G. Bergman, and T. Don Tilley

Department of Chemistry, University of California, Berkeley, CA 94720, U.S.A.

## Contents:

|                                                                                                                                        |     |
|----------------------------------------------------------------------------------------------------------------------------------------|-----|
| <b>Experimental Details</b>                                                                                                            | S3  |
| General Considerations                                                                                                                 | S3  |
| General Remarks on the Determination of Molecular Structure by X-ray Diffraction                                                       | S3  |
| Preparation of Cp*Ir(μ-N <sup>t</sup> Bu)TiCp <sub>2</sub> ( <b>2-Ti</b> )                                                             | S3  |
| UV-vis data for Cp*Ir(μ-N <sup>t</sup> Bu)ZrCp <sub>2</sub> ( <b>2-Zr</b> )                                                            | S3  |
| Preparation of Cp*Ir(μ-N <sup>t</sup> Bu)HfCp <sub>2</sub> ( <b>2-Hf</b> )                                                             | S3  |
| Preparation of [Cp <sub>2</sub> Fe][OTf]                                                                                               | S4  |
| Preparation of 2,6-lutidinium triflate, [Lut-H][OTf]                                                                                   | S4  |
| Preparation of Cp*Ir(μ-N <sup>t</sup> Bu)(μ-H)ZrCp <sub>2</sub> OTf ( <b>3-Zr</b> )                                                    | S4  |
| Alternative Preparation of Cp*Ir(μ-N <sup>t</sup> Bu)(μ-H)ZrCp <sub>2</sub> OTf ( <b>3-Zr</b> ) from Schwartz's Reagent                | S4  |
| Preparation of Cp*Ir(μ-N <sup>t</sup> Bu)(μ-H)HfCp <sub>2</sub> OTf ( <b>3-Hf</b> )                                                    | S4  |
| General procedure for the preparation of Cp*Ir(μ-N <sup>t</sup> Bu)(μ-N <sub>3</sub> C <sub>6</sub> H <sub>4</sub> R)HfCp <sub>2</sub> | S4  |
| Preparation of Cp*Ir(μ-N <sup>t</sup> Bu)(μ-NPh)HfCp <sub>2</sub> ( <b>5-Hf</b> )                                                      | S5  |
| Formation of Cp*Ir(μ-N <sup>t</sup> Bu)(μ-NC <sub>6</sub> H <sub>4</sub> R)HfCp <sub>2</sub>                                           | S5  |
| Kinetics Measurements for <b>4-Hf</b> → <b>5-Hf</b>                                                                                    | S5  |
| Preparation of Cp*Ir(μ-N <sup>t</sup> Bu)(μ-S)HfCp <sub>2</sub> ( <b>6-Hf</b> )                                                        | S6  |
| General Remarks Regarding Computational Methods                                                                                        | S6  |
| DFT Vibrational Frequency Analysis for <b>2-M</b>                                                                                      | S6  |
| TDDFT Calculations for <b>2-M</b>                                                                                                      | S6  |
| DFT Calculated <sup>1</sup> H NMR shifts for <b>3-Zr</b>                                                                               | S6  |
| DFT Vibrational Frequency Analysis for <b>3-Zr</b>                                                                                     | S6  |
| <b>Figure S1.</b> ATR-IR Spectra of Cp*Ir(μ-N <sup>t</sup> Bu)MCp <sub>2</sub> ( <b>2-M</b> )                                          | S7  |
| <b>Table S1.</b> ATR-IR Spectral Data for Cp*Ir(μ-N <sup>t</sup> Bu)MCp <sub>2</sub> ( <b>2-M</b> )                                    | S8  |
| <b>Figure S2.</b> Solution-IR Spectra of Cp*Ir(μ-N <sup>t</sup> Bu)MCp <sub>2</sub> ( <b>2-M</b> )                                     | S9  |
| <b>Table S2.</b> Solution-IR Spectral Data for Cp*Ir(μ-N <sup>t</sup> Bu)MCp <sub>2</sub> ( <b>2-M</b> )                               | S10 |
| <b>Figure S3.</b> Raman Spectra of Cp*Ir(μ-N <sup>t</sup> Bu)MCp <sub>2</sub> ( <b>2-M</b> )                                           | S11 |
| <b>Figure S4.</b> Cyclic Voltammetry Data for Cp*Ir(μ-N <sup>t</sup> Bu)MCp <sub>2</sub> ( <b>2-M</b> )                                | S12 |
| <b>Figure S5.</b> ATR-IR Spectra of Cp*Ir(μ-N <sup>t</sup> Bu)(μ-H)MCp <sub>2</sub> OTf ( <b>3-M</b> )                                 | S13 |
| <b>Table S3.</b> ATR-IR Spectral Data for Cp*Ir(μ-N <sup>t</sup> Bu)(μ-H)MCp <sub>2</sub> OTf ( <b>3-M</b> )                           | S14 |
| <b>Figure S6.</b> <sup>1</sup> H NMR Integral Intensities for <b>4-Hf</b> → <b>5-Hf</b>                                                | S15 |
| <b>Figure S7.</b> Determination of <i>k</i> from <i>a</i> for <b>4-Hf</b> → <b>5-Hf</b>                                                | S15 |
| <b>Figure S8.</b> <sup>1</sup> H NMR Spectrum of Cp*Ir(μ-N <sup>t</sup> Bu)TiCp <sub>2</sub> ( <b>2-Ti</b> )                           | S16 |
| <b>Figure S9.</b> <sup>1</sup> H NMR Spectrum of Cp*Ir(μ-N <sup>t</sup> Bu)HfCp <sub>2</sub> ( <b>2-Hf</b> )                           | S16 |
| <b>Figure S10.</b> <sup>1</sup> H NMR Spectrum of Cp*Ir(μ-N <sup>t</sup> Bu)(μ-H)ZrCp <sub>2</sub> OTf ( <b>3-Zr</b> )                 | S17 |
| <b>Figure S11.</b> <sup>1</sup> H NMR Spectrum of Cp*Ir(μ-N <sup>t</sup> Bu)(μ-H)ZrCp <sub>2</sub> OTf ( <b>3-Hf</b> )                 | S18 |
| <b>Figure S12.</b> <sup>1</sup> H NMR Spectrum of Cp*Ir(μ-N <sup>t</sup> Bu)(μ-N <sub>3</sub> Ph)HfCp <sub>2</sub> ( <b>4-Hf</b> )     | S19 |
| <b>Figure S13.</b> <sup>1</sup> H NMR Spectrum of Cp*Ir(μ-N <sup>t</sup> Bu)(μ-NPh)HfCp <sub>2</sub> ( <b>5-Hf</b> )                   | S19 |

|                                                                                                                                              |     |
|----------------------------------------------------------------------------------------------------------------------------------------------|-----|
| <b>Figure S14.</b> $^1\text{H}$ NMR Spectrum of $\text{Cp}^*\text{Ir}(\mu\text{-N}^t\text{Bu})(\mu\text{-S})\text{HfCp}_2$ ( <b>6-Hf</b> )   | S20 |
| <b>Figure S15.</b> Orbital Contour Plots for <b>2-Ti</b> , <b>2-Zr</b> , and <b>2-Hf</b>                                                     | S21 |
| <b>Figure S16.</b> Frontier Orbital Energies for <b>2-Ti</b> , <b>2-Zr</b> , and <b>2-Hf</b>                                                 | S22 |
| <b>Table S4.</b> Optimized Geometry for $\text{Cp}^*\text{Ir}(\mu\text{-N}^t\text{Bu})\text{TiCp}_2$ ( <b>2-Ti</b> )                         | S23 |
| <b>Table S5.</b> Optimized Geometry for $\text{Cp}^*\text{Ir}(\mu\text{-N}^t\text{Bu})\text{ZrCp}_2$ ( <b>2-Zr</b> )                         | S24 |
| <b>Table S6.</b> Optimized Geometry for $\text{Cp}^*\text{Ir}(\mu\text{-N}^t\text{Bu})\text{HfCp}_2$ ( <b>2-Hf</b> )                         | S25 |
| <b>Table S7.</b> Optimized Geometry for $\text{Cp}^*\text{Ir}(\mu\text{-N}^t\text{Bu})(\mu\text{-H})\text{ZrCp}_2\text{OTf}$ ( <b>3-Zr</b> ) | S26 |
| Selected TDDFT results for $\text{Cp}^*\text{Ir}(\mu\text{-N}^t\text{Bu})\text{TiCp}_2$ ( <b>2-Ti</b> ) using B3LYP                          | S28 |
| Selected TDDFT results for $\text{Cp}^*\text{Ir}(\mu\text{-N}^t\text{Bu})\text{TiCp}_2$ ( <b>2-Ti</b> ) using PW91PW91                       | S35 |
| Selected TDDFT results for $\text{Cp}^*\text{Ir}(\mu\text{-N}^t\text{Bu})\text{TiCp}_2$ ( <b>2-Zr</b> ) using B3LYP                          | S43 |
| Selected TDDFT results for $\text{Cp}^*\text{Ir}(\mu\text{-N}^t\text{Bu})\text{TiCp}_2$ ( <b>2-Zr</b> ) using PW91PW91                       | S48 |
| Selected TDDFT results for $\text{Cp}^*\text{Ir}(\mu\text{-N}^t\text{Bu})\text{TiCp}_2$ ( <b>2-Hf</b> ) using B3LYP                          | S51 |
| Selected TDDFT results for $\text{Cp}^*\text{Ir}(\mu\text{-N}^t\text{Bu})\text{TiCp}_2$ ( <b>2-Hf</b> ) using PW91PW91                       | S54 |
| References                                                                                                                                   | S57 |

## Experimental Details

### General Considerations

All manipulations were carried out under an atmosphere of purified nitrogen in a Vacuum Atmospheres Nexus glovebox, or by standard Schlenk techniques.<sup>1,2</sup> Inside the glovebox the ambient temperature ranged from 18–22 °C. All glassware was oven-dried at a temperature above 100 °C for at least 3 hours and allowed to cool under dynamic vacuum prior to use. Celite, alumina, and 4 Å sieves were activated by heating to a temperature greater than 180 °C under a dynamic vacuum for 2 d (celite) or 5 d (alumina and 4 Å sieves). Et<sub>2</sub>O, *n*-hexane, *n*-pentane, CH<sub>2</sub>Cl<sub>2</sub>, THF, benzene, and toluene were bubble degassed with nitrogen and forced, under positive pressure, through a column of activated alumina.<sup>3</sup> All solvents were stored over 4 Å sieves. C<sub>6</sub>D<sub>6</sub> was degassed under a dynamic vacuum prior to use. CD<sub>2</sub>Cl<sub>2</sub> was refluxed over CaH<sub>2</sub> for 24 h then distilled. *d*<sub>8</sub>-THF was distilled from dark purple solutions of sodium benzophenone. <sup>1</sup>H and <sup>13</sup>C NMR shifts are referenced against residual solvent resonances (for C<sub>6</sub>D<sub>6</sub>, 7.16 and 128.4; for *d*<sub>8</sub>-THF, 3.58 and 67.6; for CD<sub>2</sub>Cl<sub>2</sub>, 5.32 and 54.0 ppm). UV-vis spectra were obtained on a Cary spectrophotometer in 1-cm quartz cells. IR spectroscopy was carried out using a Thermo Scientific iS10 FT-IR spectrometer equipped with either a Smart iTR diamond, ATR accessory, or a solution cell with KBr windows. Raman spectra were acquired using a LabRamHR epillumination confocal Raman microscope, manufactured by Horiba Jobin Yvon, in conjunction with a 633 nm, He-Ne laser (1-2 mW) and a CCD detector manufactured by Andor. NMR data were acquired using 600, 500, 400, or 300 MHz spectrometers manufactured by Bruker. Positive-ion ESI-MS were acquired by the QB3 mass spectrometry facility at the University of California, Berkeley using an LTQ FT mass spectrometer, manufactured by Thermo Fisher Scientific, equipped with an electrospray ionization source and a 7 T magnet. Cyclic voltammetry was performed using an EC Epsilon potentiostat manufactured by BASi in conjunction with a glassy carbon working electrode, Pt-wire counter electrode, and Ag-wire pseudo-reference electrode. Combustion analysis was performed by the College of Chemistry Microanalytical Facility at the University of California, Berkeley, or Midwest Microlabs, LLC, Indianapolis, IN. Unless otherwise noted, Teflon-coated magnetic stir bars and magnetic stir plates were used in all reactions. Literature procedures were used for the preparation of Cp\*IrN≡Bu,<sup>4,5</sup> 2-Zr,<sup>6,7</sup> Cp<sub>2</sub>Hf(<sup>*n*</sup>Bu)<sub>2</sub>,<sup>8</sup> Cp<sub>2</sub>Ti[η<sup>2</sup>-C<sub>2</sub>(SiMe<sub>3</sub>)<sub>2</sub>],<sup>9</sup> and aromatic azides.<sup>10</sup>

### General Remarks on the Determination of Molecular Structure by X-ray Diffraction

X-ray diffraction data were collected using either Bruker AXS three-circle or Bruker AXS Microstar kappa-geometry diffractometers coupled to a CCD detector with graphite-monochromated Mo K $\alpha$  radiation ( $\lambda = 0.71073$  Å). The structures were solved by direct methods using SHELXS and refined against  $F^2$  on all data by full-matrix least squares with SHELXL-97.<sup>11</sup> All non-hydrogen atoms were refined

anisotropically; all hydrogen atoms were included into the model at their geometrically calculated positions and refined using a riding model. Additional details concerning the data collection, data work-up, and crystallographic solutions for compounds 2-Ti, 2-Hf, 3-Zr, 5-Hf are contained in the cif files that are available as electronic supplementary material.

A disordered cyclopentadienyl ligand in the structure of 3-Zr was refined with the help of similarity restraints on 1-2 and 1-3 distances and displacement parameters as well as rigid bond restraints for anisotropic displacement parameters. The ratios were refined freely, while constraining the total occupancy of all components to unity. For the purpose of calculating bond distances and angles between atoms involved in this disorder, only the major component of the disorder was considered.

### Preparation of Cp\*Ir( $\mu$ -N<sup>*n*</sup>Bu)TiCp<sub>2</sub> (2-Ti)

In the glovebox, a solution of Cp<sub>2</sub>Ti(η<sup>2</sup>-C<sub>2</sub>(SiMe<sub>3</sub>)<sub>2</sub>) (262 mg, 0.752 mmol, 1.2 equiv) in 10 mL of *n*-hexane was added to solid 1 (250 mg, 0.627 mmol, 1.0 equiv) at 20 °C. The resulting mixture was stirred at 20 °C for 14 h before the solvent was removed by application of a dynamic vacuum. To completely remove the C<sub>2</sub>(SiMe<sub>3</sub>)<sub>2</sub> byproduct, it was necessary to resuspend the mixture in 10 mL of *n*-hexane and subsequently remove solvent from the mixture using a dynamic vacuum, for a second time. The resulting brown powder was washed with *n*-pentane (3 mL  $\times$  4) that had been cooled to -35 °C to remove the excess Cp<sub>2</sub>Ti(η<sup>2</sup>-C<sub>2</sub>(SiMe<sub>3</sub>)<sub>2</sub>). This afforded Cp\*Ir( $\mu$ -N<sup>*n*</sup>Bu)TiCp<sub>2</sub> (180 mg, 0.312 mmol, 49.8%) as a bright orange powder. <sup>1</sup>H NMR (400 MHz, C<sub>6</sub>D<sub>6</sub>, 20 °C):  $\delta = 6.42$  (s, 10 H, Cp), 1.75 (s, 15 H, Cp\*), 0.78 (s, 9 H, Cp) ppm. <sup>13</sup>C NMR (100 MHz, C<sub>6</sub>D<sub>6</sub>, 20 °C):  $\delta = 114.2$  (Cp), 82.4 (C<sub>5</sub>-Cp\*), 73.5 (CMe<sub>3</sub>), 32.1 (C(CH<sub>3</sub>)<sub>3</sub>), 11.0 (Me<sub>5</sub>-Cp\*) ppm. UV-vis (Et<sub>2</sub>O, 20 °C):  $\lambda$  ( $\epsilon$ ) = 272 (25400), 295 (23200), 373 (4760) sh nm (M<sup>-1</sup>cm<sup>-1</sup>). EA calcd for C<sub>24</sub>H<sub>34</sub>IrNTi: C, 49.99; H, 5.94; N, 2.43; Found: C, 50.08; H, 5.98; N, 2.29%. Crystals suitable for single-crystal X-ray diffraction were grown at -35 °C from an *n*-pentane/Et<sub>2</sub>O solution.

### UV-vis data for Cp\*Ir( $\mu$ -N<sup>*n*</sup>Bu)ZrCp<sub>2</sub> (2-Zr)

UV-vis (Et<sub>2</sub>O, 20 °C):  $\lambda$  ( $\epsilon$ ) = 296 (11000), 395 (4200) nm (M<sup>-1</sup>cm<sup>-1</sup>). The preparation and characterization of this compound has been previously reported.<sup>6,7</sup>

### Preparation of Cp\*Ir( $\mu$ -N<sup>*n*</sup>Bu)HfCp<sub>2</sub> (2-Hf)

As powders, Cp<sub>2</sub>Hf(<sup>*n*</sup>Bu)<sub>2</sub> (530 mg, 1.25 mmol, 1.0 equiv) and 1 (500 mg, 1.25 mmol, 1.0 equiv) were combined in a 50 mL tube. To the combined solids was added 5 mL of C<sub>6</sub>H<sub>6</sub>, and the resulting mixture was freeze-pump-thaw degassed three times. This mixture was then heated to 105 °C for 3.5 h without stirring. Then, the mixture was frozen, and the solvent removed by pumping on the frozen solution at 20 °C. This procedure gives Cp\*Ir( $\mu$ -N<sup>*n*</sup>Bu)HfCp<sub>2</sub> (730 mg, 1.03 mmol, 82.6%) in greater than 90% purity. Recrystallization of the mixture from Et<sub>2</sub>O/*n*-pentane mixtures at -35 °C was inefficient and reduced the yield to (220 mg, 0.310 mmol, 25%). <sup>1</sup>H NMR (500 MHz, C<sub>6</sub>D<sub>6</sub>, 20 °C): 6.08 (s, 10 H, Cp), 1.91 (s, 15 H, Cp\*), 1.19 (s, 9 H, <sup>*n*</sup>Bu) ppm. <sup>13</sup>C NMR (100 MHz, C<sub>6</sub>D<sub>6</sub>, 20 °C):  $\delta = 110.0$  (Cp), 87.8 (C<sub>5</sub>-Cp\*), 73.9 (CMe<sub>3</sub>), 33.7 (C(CH<sub>3</sub>)<sub>3</sub>), 11.47 (Me<sub>5</sub>-Cp\*) ppm. UV-vis

(Et<sub>2</sub>O, 20 °C):  $\lambda$  ( $\epsilon$ ) = 293 (8500) sh, 373(4500) nm (M<sup>-1</sup>cm<sup>-1</sup>). EA calcd for C<sub>24</sub>H<sub>34</sub>HfIrN: C, 40.76; H, 4.85; N, 1.98; Found: C, 40.60; H, 4.57; N, 2.21%. Crystals suitable for single-crystal X-ray diffraction were grown at -35 °C from a Et<sub>2</sub>O/THF solution.

#### Preparation of [Cp<sub>2</sub>Fe][OTf]<sup>12-14</sup>

AgOTf (3 g, 11.6 mmol, 1 equiv) and Cp<sub>2</sub>Fe (2.3 g, 12.4 mmol, 1.07 equiv) were combined as solids and then cooled to -35 °C. Then 40 mL of cold (-35 °C) THF was added to the combined solids forming a brown mixture. The mixture was stirred for 25 min, during which time it became dark blue in color. The mixture was filtered through a Celite pad, and the pad was washed with THF (ca. 100 mL) until the washings were colorless. The solvent was then removed using a dynamic vacuum to produce blue powder. This powder was washed with *n*-pentane (50 mL × 2) and Et<sub>2</sub>O (20 mL × 3) to remove the excess Cp<sub>2</sub>Fe. The washed solids were stored under a dynamic vacuum to remove traces of solvent. The resulting blue powder was collected (3.64 g, 10.8 mmol, 94%). <sup>1</sup>H NMR (500 MHz, CD<sub>2</sub>Cl<sub>2</sub>, 20 °C):  $\delta$  = 33.27 (br s,  $\Delta\nu_{1/2}$  = 720 Hz, 10 H, Cp) ppm. <sup>19</sup>F NMR (376 MHz, CD<sub>2</sub>Cl<sub>2</sub>, 20 °C):  $\delta$  = -89.72 ppm. EA calcd for C<sub>11</sub>H<sub>10</sub>F<sub>3</sub>FeO<sub>3</sub>S: C, 39.43; H, 3.01; Found: C, 39.24; H, 2.93%. ESI-MS(+): *m/z* = 186.0125 (186.0126, Cp<sub>2</sub>Fe<sup>+</sup>).

#### Preparation of 2,6-lutidinium triflate, [Lut-H][OTf]<sup>15,16</sup>

At 20 °C, to a solution of 2,6-lutidine (2.71 g, 25 mmol, 1 equiv) in 25 mL of *n*-pentane was added triflic acid (3.84 g, 25 mmol, 1 equiv) dropwise. Following the addition, the mixture was allowed to stir for 10 min before the white precipitate was collected by filtration. The so obtained solids were washed with Et<sub>2</sub>O (10 mL × 3), and stripped of the remaining solvent under a dynamic vacuum to yield the product (4.5 g, 17.5 mmol, 70%). <sup>1</sup>H NMR (500 MHz, CD<sub>2</sub>Cl<sub>2</sub>, 20 °C):  $\delta$  = 14.45 (s, 1 H, *NH*), 8.24 (t, *J*<sub>HH</sub> = 8 Hz, 1 H, para-H), 7.57 (d, *J*<sub>HH</sub> = 8 Hz, 9 H, meta-H), -8.09 (s, 1 H,  $\mu$ -H) ppm. <sup>13</sup>C NMR (125 MHz, CD<sub>2</sub>Cl<sub>2</sub>, 20 °C):  $\delta$  = 154.4 (2,6-C), 146.6 (4-C), 125.5 (3,5-C), 121.0 (q, *J*<sub>CF</sub> = 320 Hz, CF<sub>3</sub>) 19.9 (Me) ppm. <sup>19</sup>F NMR (376 MHz, CD<sub>2</sub>Cl<sub>2</sub>, 20 °C):  $\delta$  = -79.4 ppm. EA calcd for C<sub>8</sub>H<sub>10</sub>F<sub>3</sub>NO<sub>3</sub>S: C, 37.35; H, 3.92; N, 5.45; Found: C, 37.35; H, 3.91; N, 5.45%. ESI-MS(+): *m/z* = 108.08080 (108.08078, C<sub>7</sub>H<sub>10</sub>N<sup>+</sup>).

#### Preparation of Cp\*Ir( $\mu$ -N<sup>t</sup>Bu)( $\mu$ -H)ZrCp<sub>2</sub>OTf (3-Zr)

At -35 °C, a solution of 2,6-lutidinium triflate (48 mg, 0.187 mmol, 0.95 equiv) in 5 mL THF was added dropwise to a solution of Cp\*Ir( $\mu$ -N<sup>t</sup>Bu)ZrCp<sub>2</sub> (122 mg, 0.196 mmol, 1 equiv) in 10 mL of THF. During the addition a change in the color of the solution from red to orange was observed. The mixture was stirred for 15 min before the solvent was removed by the application of a dynamic vacuum. The mixture was then stored under a dynamic vacuum for 14 h to evaporate 2,6-lutidine formed during the reaction. The remaining material was washed with *n*-pentane (5 mL × 3). The product was then obtained via crystallization from THF layered with a mixture of 1:1 Et<sub>2</sub>O/*n*-pentane at -35 °C as two crops of orange crystals (121 mg, 0.157 mmol, 84%). <sup>1</sup>H NMR (400 MHz, *d*<sub>8</sub>-THF, 20 °C): 6.08 (s, 10 H, Cp), 1.99 (s, 15 H, Cp\*), 1.36 (s, 9 H, <sup>t</sup>Bu), -8.08 (s, 1 H,  $\mu$ -H) ppm. <sup>13</sup>C NMR (100 MHz, *d*<sub>8</sub>-THF, 20 °C):  $\delta$  = 111.2 (Cp), 90.0

(C<sub>5</sub>-Cp\*), 80.3 (CMe<sub>3</sub>), 31.9 (C(CH<sub>3</sub>)<sub>3</sub>), 10.51 (Me<sub>5</sub>-Cp\*) ppm. <sup>19</sup>F NMR (376 MHz, *d*<sub>8</sub>-THF, 20 °C):  $\delta$  = -79.2 ppm. <sup>1</sup>H NMR (400 MHz, CD<sub>2</sub>Cl<sub>2</sub>, 20 °C):  $\delta$  = 6.06 (s, 10 H, Cp), 1.95 (s, 15 H, Cp\*), 1.32 (s, 9 H, <sup>t</sup>Bu), -8.09 (s, 1 H,  $\mu$ -H) ppm. <sup>19</sup>F NMR (376 MHz, CD<sub>2</sub>Cl<sub>2</sub>, 20 °C):  $\delta$  = -78.7 ppm. EA calcd for C<sub>25</sub>H<sub>34</sub>F<sub>3</sub>IrNO<sub>3</sub>SZr: C, 39.04; H, 4.46; N, 1.82; Found: C, 38.32; H, 4.25; N, 1.84%. ESI-MS(+): *m/z* = 620.1442 (620.1440, M<sup>+</sup>-OTf).

#### Alternative Preparation of Cp\*Ir( $\mu$ -N<sup>t</sup>Bu)( $\mu$ -H)ZrCp<sub>2</sub>OTf (3-Zr) from Schwartz's Reagent

A solution of Cp\*IrN<sup>t</sup>Bu (100 mg, 0.251 mmol, 1equiv) in 10 mL of CH<sub>2</sub>Cl<sub>2</sub> and added to solid Cp<sub>2</sub>Zr(H)Cl (75 mg, 0.256 mmol, 1equiv) at 20 °C. This produced a cloudy suspension that was stirred for 5 min before a solution of Me<sub>3</sub>SiOTf (56 mg, 0.252 mmol, 1 equiv) in 3 mL CH<sub>2</sub>Cl<sub>2</sub> was added. Upon addition of the final reagent, the mixture immediately clarified to form an orange solution. This solution was stirred an additional 10 min before it was filtered through celite and concentrated to ca. 2 mL. The solution was layered with ca. 10 mL of *n*-pentane and stored at -35 °C to precipitate an orange powder which was collected by filtration. The so-obtained solids were washed with *n*-pentane (5 mL × 3) at 20 °C to afford the product. 124 mg, 0.161, 64%

#### Preparation of Cp\*Ir( $\mu$ -N<sup>t</sup>Bu)( $\mu$ -H)HfCp<sub>2</sub>OTf (3-Hf)

At -35 °C, a solution of 2,6-lutidinium triflate (14 mg, 0.054 mmol, 0.98 equiv) in 2 mL of THF was added dropwise to a solution of Cp\*Ir( $\mu$ -N<sup>t</sup>Bu)HfCp<sub>2</sub> (39 mg, 0.055 mmol, 1 equiv) in 5 mL of THF. Upon addition of 2,6-lutidinium triflate, the initially red solution became yellow in color. The reaction mixture was stirred for 15 min before the solvent was removed by application of a dynamic vacuum. The so-obtained solids were stored under a dynamic vacuum for 6 h to evaporate the 2,6-lutidine formed in the reaction. The remaining material was washed with *n*-pentane (10 mL × 3) and dissolved in a minimum of THF (ca. 2 mL). The THF solution was layered with 10 mL of 1:1 Et<sub>2</sub>O/*n*-pentane and stored at -35 °C to afford the product as yellow crystals (34mg, 0.039 mmol, 72%). <sup>1</sup>H NMR (400 MHz, *d*<sub>8</sub>-THF, 20 °C): 6.05 (s, 10 H, Cp), 1.98 (s, 15 H, Cp\*), 1.38 (s, 9 H, <sup>t</sup>Bu), -7.17 (s, 1 H,  $\mu$ -H) ppm. <sup>13</sup>C NMR (100 MHz, *d*<sub>8</sub>-THF, 20 °C):  $\delta$  = 109.2 (Cp), 93.6 (C<sub>5</sub>-Cp\*), 80.2 (CMe<sub>3</sub>), 27.9 (C(CH<sub>3</sub>)<sub>3</sub>), 9.6 (Me<sub>5</sub>-Cp\*) ppm. <sup>19</sup>F NMR (376 MHz, *d*<sub>8</sub>-THF, 20 °C):  $\delta$  = -79.1 ppm. <sup>1</sup>H NMR (400 MHz, CD<sub>2</sub>Cl<sub>2</sub>, 20 °C): 6.06 (s, 10 H, Cp), 1.95 (s, 15 H, Cp\*), 1.32 (s, 9 H, <sup>t</sup>Bu), -8.09 (s, 1 H,  $\mu$ -H) ppm. <sup>19</sup>F NMR (376 MHz, CD<sub>2</sub>Cl<sub>2</sub>, 20 °C):  $\delta$  = -78.9 ppm. EA calcd for C<sub>25</sub>H<sub>35</sub>F<sub>3</sub>HfIrNO<sub>3</sub>S: C, 35.02; H, 4.12; N, 1.63; Found: C, 35.17; H, 4.36; N, 1.70%.

#### General procedure for the preparation of Cp\*Ir( $\mu$ -N<sup>t</sup>Bu)( $\mu$ -N<sub>3</sub>C<sub>6</sub>H<sub>4</sub>R)HfCp<sub>2</sub>, R = Me<sub>2</sub>N, Me, H, Br, CF<sub>3</sub>

A ca 0.01 M solution of the appropriate aryl azide in *n*-pentane was cooled to -35 °C. This solution was then transferred onto solid 2-Hf, immediately forming a green solution. The solution was stirred for 2 h before the solvent was removed under dynamic vacuum. Storing the green solids under dynamic vacuum for ca. 6 h removed the excess aryl azide, leaving only the azide complex, Cp\*Ir( $\mu$ -N<sup>t</sup>Bu)( $\mu$ -N<sub>3</sub>C<sub>6</sub>H<sub>4</sub>R)HfCp<sub>2</sub>. The

following lists the amounts used for each procedure: for R=NMe<sub>2</sub>, 40 mg, 0.057 mmol, 1 equiv Hf and 9.2 mg, 0.057 mmol, 1.0 equiv azide gave 46 mg, 0.053 mmol, 93%; for 4-Me, 71 mg, 0.10 mmol, 1 equiv Hf and 12 mg, 0.105 mmol, 1.05 equiv azide gave 80 mg, 0.095 mmol, 94%; for 4-H, 80 mg, 0.113 mmol, 1 equiv Hf and 12 mg, 0.117 mmol, 1.05 equiv azide gave 91 mg, 0.110 mmol, 97%; for 4-Br, 40 mg, 0.057 mmol, 1 equiv Hf and 12 mg, 0.060 mmol, 1.05 equiv azide gave 48 mg, 0.052 mmol, 92%; and for 4-CF<sub>3</sub>, 40 mg, 0.057 mmol, 1 equiv Hf and 11 mg, 0.058 mmol, 1.05 equiv azide gave 47 mg, 0.051 mmol, 92%.

**Characterization Data for Cp\*Ir(μ-N<sup>t</sup>Bu)(μ-N<sub>3</sub>C<sub>6</sub>H<sub>4</sub>NMe<sub>2</sub>)HfCp<sub>2</sub>**

<sup>1</sup>H NMR (500 MHz, C<sub>6</sub>D<sub>6</sub>, 20 °C): 8.10 (d, *J*<sub>HH</sub> = 7 Hz, 2 H, *o*-Ar), 6.91 (d, *J*<sub>HH</sub> = 7 Hz, 2 H, *m*-Ar), 5.95 (s, 10 H, Cp), 2.73 (s, 6 H, NMe<sub>2</sub>), 1.56 (s, 9 H, <sup>t</sup>Bu), 1.46 (s, 15 H, Cp\*) ppm. <sup>13</sup>C NMR (125 MHz, C<sub>6</sub>D<sub>6</sub>, 20 °C): δ = 148.2 (*ipso*-Ar), 147.5 (Ar), 122.2 (Ar), 114.8 (Ar), 108.4 (Cp), 88.8 (C<sub>5</sub>-Cp\*), 69.9 (CMe<sub>3</sub>), 41.6 (N(CH<sub>3</sub>)<sub>2</sub>), 36.5 (C(CH<sub>3</sub>)<sub>3</sub>), 10.9 (*Me*<sub>5</sub>-Cp\*) ppm.

**Characterization Data for Cp\*Ir(μ-N<sup>t</sup>Bu)(μ-N<sub>3</sub>C<sub>6</sub>H<sub>4</sub>Me)HfCp<sub>2</sub>**

<sup>1</sup>H NMR (500 MHz, C<sub>6</sub>D<sub>6</sub>, 20 °C): 8.03 (d, *J*<sub>HH</sub> = 8 Hz, 2 H, *o*-tol), 7.35 (d, *J*<sub>HH</sub> = 8 Hz, 2 H, *m*-tol), 5.88 (s, 10 H, Cp), 2.34 (s, 3 H, tol-Me), 1.58 (s, 9 H, <sup>t</sup>Bu), 1.44 (s, 15 H, Cp\*) ppm. <sup>13</sup>C NMR (125 MHz, C<sub>6</sub>D<sub>6</sub>, 20 °C): δ = 153.9 (*ipso*-tol), 132.0 (*ipso*-tol), 130.3 (tol), 121.3 (tol), 108.4 (Cp), 89.0 (C<sub>5</sub>-Cp\*), 70.2 (CMe<sub>3</sub>), 36.4 (C(CH<sub>3</sub>)<sub>3</sub>), 21.6 (tol-Me), 10.7 (*Me*<sub>5</sub>-Cp\*) ppm.

**Characterization Data for Cp\*Ir(μ-N<sup>t</sup>Bu)(μ-N<sub>3</sub>Ph)HfCp<sub>2</sub> (5-Hf)**

<sup>1</sup>H NMR (400 MHz, C<sub>6</sub>D<sub>6</sub>, 20 °C): 8.09 (d, *J*<sub>HH</sub> = 7 Hz, 2 H, *o*-Ph), 7.55 (t, *J*<sub>HH</sub> = 7 Hz, 2 H, *p*-Ph), 7.17 (t, obscured by residual solvent, 2 H, *m*-Ph), 5.88 (s, 10 H, Cp), 1.57 (s, 9 H, <sup>t</sup>Bu), 1.42 (s, 15 H, Cp\*) ppm. <sup>13</sup>C NMR (100 MHz, C<sub>6</sub>D<sub>6</sub>, 20 °C): δ = 156.0 (*ipso*-Ph), 129.7 (Ph), 123.0 (Ph), 121.3 (Ph), 108.5 (Cp), 89.1 (C<sub>5</sub>-Cp\*), 70.4 (CMe<sub>3</sub>), 36.5 (C(CH<sub>3</sub>)<sub>3</sub>), 10.8 (*Me*<sub>5</sub>-Cp\*) ppm. EA calcd for C<sub>30</sub>H<sub>39</sub>HfIrN<sub>4</sub>: C, 43.60; H, 4.75; N, 6.77; Found: C, 44.0; H, 5.06; N, 5.90%. ESI-MS(+): *m/z* = 829.2376 (829.2348, MH<sup>+</sup>) amu.

**Characterization Data for Cp\*Ir(μ-N<sup>t</sup>Bu)(μ-N<sub>3</sub>C<sub>6</sub>H<sub>4</sub>Br)HfCp<sub>2</sub>**

<sup>1</sup>H NMR (600 MHz, C<sub>6</sub>D<sub>6</sub>, 20 °C): 7.74 (d, *J*<sub>HH</sub> = 9 Hz, 2 H, *o*-Ar), 7.58 (d, *J*<sub>HH</sub> = 9 Hz, 2 H, *m*-Ar), 5.80 (s, 10 H, Cp), 1.51 (s, 9 H, <sup>t</sup>Bu), 1.35 (s, 15 H, Cp\*) ppm. <sup>13</sup>C NMR (150 MHz, C<sub>6</sub>D<sub>6</sub>, 20 °C): δ = 155.0 (*ipso*-Ar), 133.2 (Ar), 118.2 (Ar), 115.1 (Ar), 108.6 (Cp), 89.2 (C<sub>5</sub>-Cp\*), 70.6 (CMe<sub>3</sub>), 36.3 (C(CH<sub>3</sub>)<sub>3</sub>), 10.7 (*Me*<sub>5</sub>-Cp\*) ppm.

**Characterization Data for Cp\*Ir(μ-N<sup>t</sup>Bu)(μ-N<sub>3</sub>C<sub>6</sub>H<sub>4</sub>CF<sub>3</sub>)HfCp<sub>2</sub>**

<sup>1</sup>H NMR (600 MHz, C<sub>6</sub>D<sub>6</sub>, 20 °C): 7.89 (d, *J*<sub>HH</sub> = 8 Hz, 2 H, *o*-Ar), 7.74 (d, *J*<sub>HH</sub> = 8 Hz, 2 H, *m*-Ar), 5.82 (s, 10 H, Cp), 1.53 (s, 9 H, <sup>t</sup>Bu), 1.37 (s, 15 H, Cp\*) ppm. <sup>13</sup>C NMR (150 MHz, C<sub>6</sub>D<sub>6</sub>, 20 °C): δ = 158.8 (*ipso*-Ar), 126.92 (q, *J* = Hz, Ar), 125.8 (Ar), 123.3 (q, *J*<sub>CF</sub> = 320 Hz, CF<sub>3</sub>), 108.7 (Cp), 89.5 (C<sub>5</sub>-Cp\*), 70.9 (CMe<sub>3</sub>), 36.3 (C(CH<sub>3</sub>)<sub>3</sub>), 10.7 (*Me*<sub>5</sub>-Cp\*) ppm. One <sup>13</sup>C resonance was not located, presumably because it is obscured by the resonance for C<sub>6</sub>D<sub>6</sub>. <sup>19</sup>F NMR (376 MHz, C<sub>6</sub>D<sub>6</sub>, 20 °C): δ = -60.8 ppm.

**Preparation of Cp\*Ir(μ-N<sup>t</sup>Bu)(μ-NPh)HfCp<sub>2</sub> (5-Hf)**

A 0.6 mL C<sub>6</sub>D<sub>6</sub> solution of 45 mg(0.054 mmol) Cp\*Ir(μ-N<sup>t</sup>Bu)(μ-N<sub>3</sub>Ph)HfCp<sub>2</sub> was heated to 120 °C for 6 h. After this time the mixture was analyzed by <sup>1</sup>H NMR spectroscopy which indicated that the starting material had been consumed and conversion to the desired product proceeded in >90%. The material was crystallized from *n*-pentane/Et<sub>2</sub>O mixtures at -35 °C in two crops. 36 mg, 0.045, 83% <sup>1</sup>H NMR (600 MHz, C<sub>6</sub>D<sub>6</sub>, 20 °C): δ = 7.36 (d, *J*<sub>HH</sub> = 8 Hz, 2 H, *o*-Ph), 6.95 (t, *J*<sub>HH</sub> = 8 Hz, 1 H, *p*-Ph), 6.91 (t, *J*<sub>HH</sub> = 8 Hz, 2 H, *m*-Ph), 5.81 (s, 10 H, Cp), 1.71 (s, 9 H, <sup>t</sup>Bu), 1.20 (s, 15 H, Cp\*) ppm. <sup>13</sup>C NMR (100 MHz, C<sub>6</sub>D<sub>6</sub>, 20 °C): δ = 168.2 (*ipso*-Ph), 128.3 (Ph), 125.9 (Ph), 120.1 (Ph), 109.3 (Cp), 87.1 (C<sub>5</sub>-Cp\*), 68.4 (CMe<sub>3</sub>), 36.7 (C(CH<sub>3</sub>)<sub>3</sub>), 11.0 (*Me*<sub>5</sub>-Cp\*) ppm.

**Formation of Cp\*Ir(μ-N<sup>t</sup>Bu)(μ-NC<sub>6</sub>H<sub>4</sub>R)HfCp<sub>2</sub> by N<sub>2</sub> Extrusion from Cp\*Ir(μ-N<sup>t</sup>Bu)(μ-N<sub>3</sub>C<sub>6</sub>H<sub>4</sub>R)HfCp<sub>2</sub> (R = NMe<sub>2</sub>, Me, Br, CF<sub>3</sub>)**

The procedure described for the preparation of 5-Hf was followed for each compound in this series.

**Characterization Data for Cp\*Ir(μ-N<sup>t</sup>Bu)(μ-NC<sub>6</sub>H<sub>4</sub>NMe<sub>2</sub>)HfCp<sub>2</sub>**

<sup>1</sup>H NMR (400 MHz, C<sub>6</sub>D<sub>6</sub>, 20 °C): δ = 6.94 (d, *J*<sub>HH</sub> = 8 Hz, 2 H, *o*-Ar), 6.85 (d, *J*<sub>HH</sub> = 8 Hz, 2 H, *m*-Ar), 5.86 (s, 10 H, Cp), 3.31 (s, 6 H, NMe<sub>2</sub>), 2.76 (s, 9 H, <sup>t</sup>Bu), 1.76 (s, 15 H, Cp\*) ppm.

**Characterization Data for Cp\*Ir(μ-N<sup>t</sup>Bu)(μ-NC<sub>6</sub>H<sub>4</sub>Me)HfCp<sub>2</sub>**

<sup>1</sup>H NMR (500 MHz, C<sub>6</sub>D<sub>6</sub>, 20 °C): δ = 6.96 (d, *J*<sub>HH</sub> = 8 Hz, 2 H, *o*-tol), 6.87 (d, *J*<sub>HH</sub> = 8 Hz, 2 H, *m*-tol), 5.83 (s, 10 H, Cp), 2.44 (s, 3 H, tol-Me), 1.73 (s, 9 H, <sup>t</sup>Bu), 1.22 (s, 15 H, Cp\*) ppm.

**Characterization Data for Cp\*Ir(μ-N<sup>t</sup>Bu)(μ-NC<sub>6</sub>H<sub>4</sub>Br)HfCp<sub>2</sub>**

<sup>1</sup>H NMR (300 MHz, C<sub>6</sub>D<sub>6</sub>, 20 °C): δ = 7.62 (d, *J*<sub>HH</sub> = 9 Hz, 2 H, *o*-Ar), 6.61 (d, *J*<sub>HH</sub> = 9 Hz, 2 H, *m*-Ar), 5.74 (s, 10 H, Cp), 1.65 (s, 9 H, <sup>t</sup>Bu), 1.13 (s, 15 H, Cp\*) ppm.

**Characterization Data for Cp\*Ir(μ-N<sup>t</sup>Bu)(μ-NC<sub>6</sub>H<sub>4</sub>CF<sub>3</sub>)HfCp<sub>2</sub>**

<sup>1</sup>H NMR (300 MHz, C<sub>6</sub>D<sub>6</sub>, 20 °C): δ = 7.56 (d, *J*<sub>HH</sub> = 8 Hz, 2 H, *o*-Ar), 6.70 (d, *J*<sub>HH</sub> = 8 Hz, 2 H, *m*-Ar), 5.73 (s, 10 H, Cp), 1.62 (s, 9 H, <sup>t</sup>Bu), 1.13 (s, 15 H, Cp\*) ppm. <sup>19</sup>F NMR (376 MHz, C<sub>6</sub>D<sub>6</sub>, 20 °C): δ = -60.4 ppm.

**Kinetics Measurements for 4-Hf → 5-Hf**

A stock solution of 2-Hf (2.5 mmol) in *d*<sub>12</sub>-mesitylene was prepared and *ca.* 1 equiv of 1,3,5-trimethoxybenzene was added as an internal standard. An aliquot of the solution was transferred to a J. Young tube which was sealed with a Teflon screw-cap under *ca.* 1 atm of N<sub>2</sub>. The sample was transported to a 500 MHz NMR spectrometer at 20 °C and inserted into a pre-warmed probe. Temperatures from 105 to 135 °C were studied, and the probe temperature was determined by use of a neat ethylene glycol sample. The sample was given 5 min to ensure that the temperature had reached equilibrium before kinetics measurements began. To obtain kinetic information, single-scan <sup>1</sup>H NMR spectra were obtained in either 5 or 10 min intervals, and the relative concentration of 4-Hf was determined by integration of the Cp resonance, which decreases in intensity with time. The resonances corresponding to 5-Hf increased with time. However, following the concentration of 5-Hf as a function of time did not



produce useful kinetic information due to the fact that **5-Hf** precipitates from the reaction mixture. The integrals for the added 1,3,5-trimethoxybenzene were invariant with respect to time at all temperatures studied. For complexes  $\text{Cp}^*\text{Ir}(\mu\text{-N}^t\text{Bu})(\mu\text{-N}_3\text{C}_6\text{H}_4\text{R})\text{HfCp}_2$  ( $\text{R} = \text{Me}_2\text{N}, \text{Me}, \text{Br}, \text{CF}_3$ ), the kinetic measurements were carried out in an identical fashion at 130 °C. The reaction kinetics were monitored for no fewer than 3 half-lives, except for when the total length of the required run made this inconvenient. Specifically, 1 and 2.6 half-lives of data were obtained at 105 and 115 °C, respectively, and 2.4 half-lives for  $\text{Cp}^*\text{Ir}(\mu\text{-}^t\text{Bu})(\mu\text{-N}_3\text{C}_6\text{H}_4\text{NMe}_2)\text{HfCp}_2$  at 130 °C. This experiment was repeated using a solution containing 12.5 mmol of **5-Hf** at 130 °C, and identical kinetic behavior was observed.

#### Preparation of $\text{Cp}^*\text{Ir}(\mu\text{-N}^t\text{Bu})(\mu\text{-S})\text{HfCp}_2$ (**6-Hf**)

At 20 °C, an 8 mL solution of **2-Hf** (45 mg, 0.070 mmol, 1 equiv) in  $\text{C}_6\text{H}_6$  was added to a 2 mL  $\text{C}_6\text{H}_6$  slurry of  $\text{S}_8$  (2.25 mg, 0.0088 mmol, 0.126 equiv). The resulting mixture was stirred for 30 min before it is filtered twice through a glass fiber and the solution frozen.  $\text{C}_6\text{H}_6$  was removed from the frozen solution to yield a green solid (43.5 mg, 0.064 mmol, 92%).  $^1\text{H}$  NMR (500 MHz,  $\text{C}_6\text{D}_6$ , 20 °C): 5.73 (s, 10 H, Cp), 1.73 (s, 9 H,  $^t\text{Bu}$ ), 1.50 (s, 15 H, Cp\*) ppm.  $^{13}\text{C}$  NMR (125 MHz,  $\text{C}_6\text{D}_6$ , 20 °C):  $\delta = 109.4$  (Cp), 88.7 ( $\text{C}_5\text{-Cp}^*$ ), 72.2 ( $\text{CMe}_3$ ), 36.2 ( $\text{C}(\text{CH}_3)_3$ ), 11.36 ( $\text{Me}_5\text{-Cp}^*$ ) ppm. ESI-MS:  $m/z = 742.1610$  ( $742.1579$ ,  $\text{MH}^+$ ) amu.

#### General Remarks Regarding Computational Methods

Density functional theory (DFT) calculations were performed using the Gaussian09 software package.<sup>17</sup> The basis set SDD was used for Hf, Ir, Ti, and Zr with effective core potentials,<sup>18-20</sup> whereas 6-31G\* was used for all other atoms.<sup>21,22</sup> Both hybrid functional B3LYP<sup>23-26</sup> and pure DFT functional PW91PW91<sup>27-31</sup> were used for calculations involving 1-M ( $\text{M} = \text{Ti}, \text{Zr}, \text{Hf}$ ). While only B3LYP was used for **2-Zr**. Optimized geometries for these compounds are given in Tables S4–S7. All geometry optimization procedures were initiated from atomic coordinates of single-crystal X-ray structures, and the resulting optimized geometries were subjected to vibrational frequency calculations to ensure that these correspond to a minimum on the potential energy surface.

#### DFT Vibrational Frequency Analysis for **2-M**

Optimized geometries for **2-M** were subjected to vibrational frequency analysis that also predicted Raman intensity using the Gaussian09 package.<sup>17</sup> Predominantly metal-metal stretching modes were located by inspection of the atomic displacements for

each mode, and were visualized using the Gaussian09 package. A comparison of the energies between the DFT-predicted and experimentally assigned vibrations are shown in Table 3. These energies are not corrected and no scaling factor was used.

**Table 3.** DFT Predicted Ir–M Stretching Modes for **2-M**.

| <b>2-M</b> | experimental | B3LYP  | PW91PW91 |
|------------|--------------|--------|----------|
| Ti         | 238          | 279.02 | 280.95   |
| Zr         | 153          | 189.18 | 185.57   |
| Hf         | —            | 164.26 | 168.99   |

#### TDDFT Calculations for **2-M**

The first 50 singlet-to-singlet electronic excited states were calculated for each **2-M** using the TDDFT<sup>32-36</sup> implementation provided with the Gaussian09 software package.<sup>17</sup> Both the pure DFT functional PW91PW91<sup>27-31</sup> and the hybrid functional B3LYP<sup>23-26</sup> were used. Molecular orbital contour plots were generated from the Gaussian checkpoint file that was written by the calculation using the B3LYP functional. The first 50 electronic excited states for **2-Ti** and the first 20 electronic excited states for **2-Zr** and **2-Hf** are listed below.

#### DFT Calculated $^1\text{H}$ NMR shifts for **3-Zr**

The NMR shifts were predicted using the gauge-independent atomic orbital method<sup>37-41</sup> as it is implemented by the NMR prediction utility<sup>42-44</sup> that is packaged with Gaussian09.<sup>17</sup> This method provided chemical shielding tensors for the hydrogen atoms contained in **3-Zr**. The calculated chemical shielding tensors of individual hydrogen atoms were averaged for each the Cp, Cp\*, and  $^t\text{Bu}$  ligand. The chemical shift tensors for the Cp\* ligand was used as the reference signal, and the chemical shift set to 1.99 ppm, the value found in  $d_8\text{-THF}$ . This led to the predicted shifts of 6.06, 1.24, and  $-4.39$  ppm for the Cp,  $^t\text{Bu}$ , and hydride ligands, respectively.

#### DFT Vibrational Frequency Analysis for **3-Zr**

A vibrational frequency analysis was performed by the Gaussian09 computational package.<sup>17</sup> A single vibration was found that only displaced the hydride ligand, while the atomic positions of other atoms were virtually unchanged. This vibrational mode corresponds to an energy of  $2047.5\text{ cm}^{-1}$ .

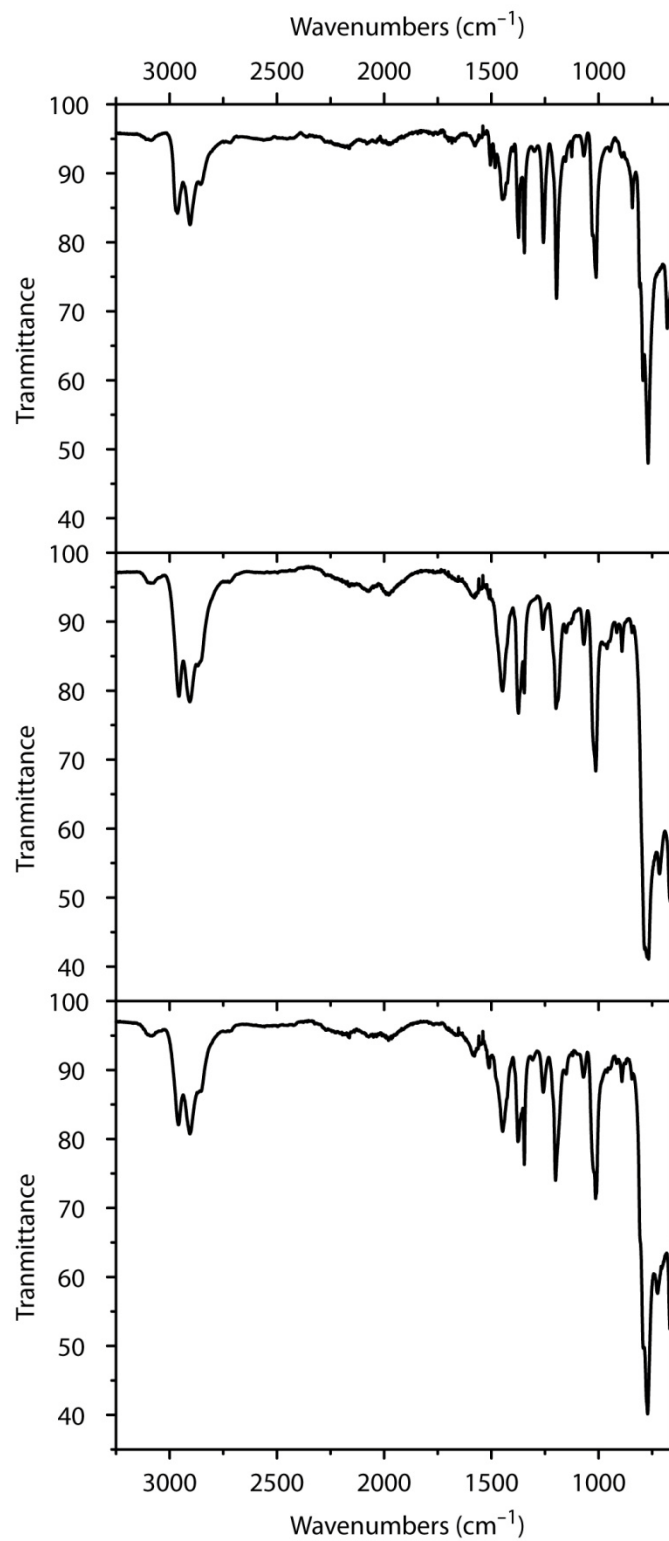

**Figure S1.** ATR-IR spectroscopy data for Cp\*Ir(μ-N<sup>t</sup>Bu)MCp<sub>2</sub> (2-M).

**Table S1.** Solid-state (ATR) IR Data for Cp\*Ir( $\mu$ -N<sup>t</sup>Bu)MCp<sub>2</sub> (**2-M**).

| Ti                           |               | Zr                           |               | Hf                           |               |
|------------------------------|---------------|------------------------------|---------------|------------------------------|---------------|
| Position (cm <sup>-1</sup> ) | Transmittance | Position (cm <sup>-1</sup> ) | Transmittance | Position (cm <sup>-1</sup> ) | Transmittance |
| 3088                         | 94.77         | 3088                         | 95.58         | 3088                         | 94.95         |
| 2964                         | 84.21         | 2957                         | 79.19         | 2959                         | 82.07         |
| 2905                         | 82.55         | 2906                         | 78.39         | 2906                         | 80.75         |
| 2855                         | 88.40         | 2869                         | 83.59         | 2869                         | 86.70         |
| 1505                         | 91.18         | 1509                         | 93.38         | 1511                         | 90.32         |
| 1447                         | 86.21         | 1447                         | 79.95         | 1447                         | 81.10         |
| 1373                         | 80.70         | 1374                         | 76.74         | 1376                         | 79.62         |
| 1346                         | 78.47         | 1346                         | 79.68         | 1346                         | 76.30         |
| 1257                         | 79.97         | 1259                         | 88.90         | 1258                         | 86.78         |
| 1196                         | 71.87         | 1199                         | 77.41         | 1201                         | 74.01         |
| 1069                         | 92.53         | 1069                         | 86.71         | 1071                         | 88.96         |
| 1012                         | 74.92         | 1013                         | 68.34         | 1014                         | 71.36         |
| 948                          | 93.20         | 915                          | 88.40         | 915                          | 90.95         |
| 891                          | 92.36         | 891                          | 85.71         | 891                          | 88.34         |
| 843                          | 85.00         | 844                          | 88.42         | 845                          | 88.69         |
| 808                          | 73.48         | 785                          | 41.36         | 808                          | 65.90         |
| 793                          | 59.97         | 774                          | 42.48         | 792                          | 49.69         |
| 769                          | 47.97         | 767                          | 41.08         | 771                          | 40.16         |
| —                            | —             | 716                          | 53.44         | 725                          | 57.62         |
| 680                          | 67.52         | 666                          | 49.43         | 668                          | 52.48         |



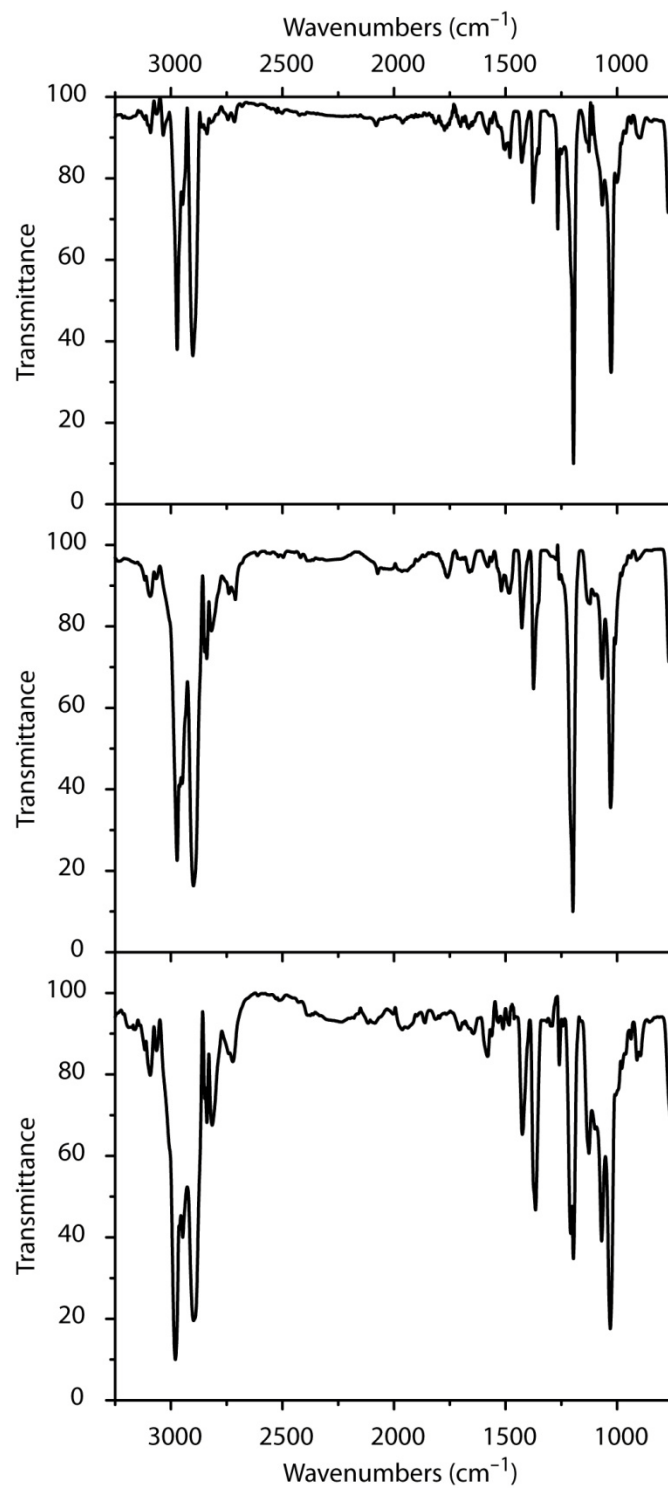

**Figure S2.** Solution infrared spectroscopy data for Cp\*Ir( $\mu$ -N<sup>t</sup>Bu)MCp<sub>2</sub> (2-M) in C<sub>6</sub>D<sub>6</sub> using a KBr cell.

**Table S2.** Solution (C<sub>6</sub>D<sub>6</sub>) IR Data for Cp\*Ir(μ-N<sup>t</sup>Bu)MCp<sub>2</sub> (**2-M**).

| Ti                           |     | Zr                           |     | Hf                           |     |
|------------------------------|-----|------------------------------|-----|------------------------------|-----|
| Position (cm <sup>-1</sup> ) |     | Position (cm <sup>-1</sup> ) |     | Position (cm <sup>-1</sup> ) |     |
| 3092                         | (w) | 3093                         | (w) | 3093                         | (w) |
| 2972                         | (s) | 2972                         | (s) | 2980                         | (s) |
| 2947                         | (m) | 2949                         | (m) | 2947                         | (m) |
| 2900                         | (s) | 2899                         | (s) | 2898                         | (s) |
| 1427                         | (w) | 1427                         | (w) | 1425                         | (m) |
| 1376                         | (m) | 1374                         | (m) | 1366                         | (m) |
| 1266                         | (m) | 1211                         | (m) | 1209                         | (m) |
| 1195                         | (s) | 1198                         | (s) | 1196                         | (s) |
| 1066                         | (m) | 1067                         | (m) | 1069                         | (m) |
| 1027                         | (s) | 1029                         | (s) | 1030                         | (s) |

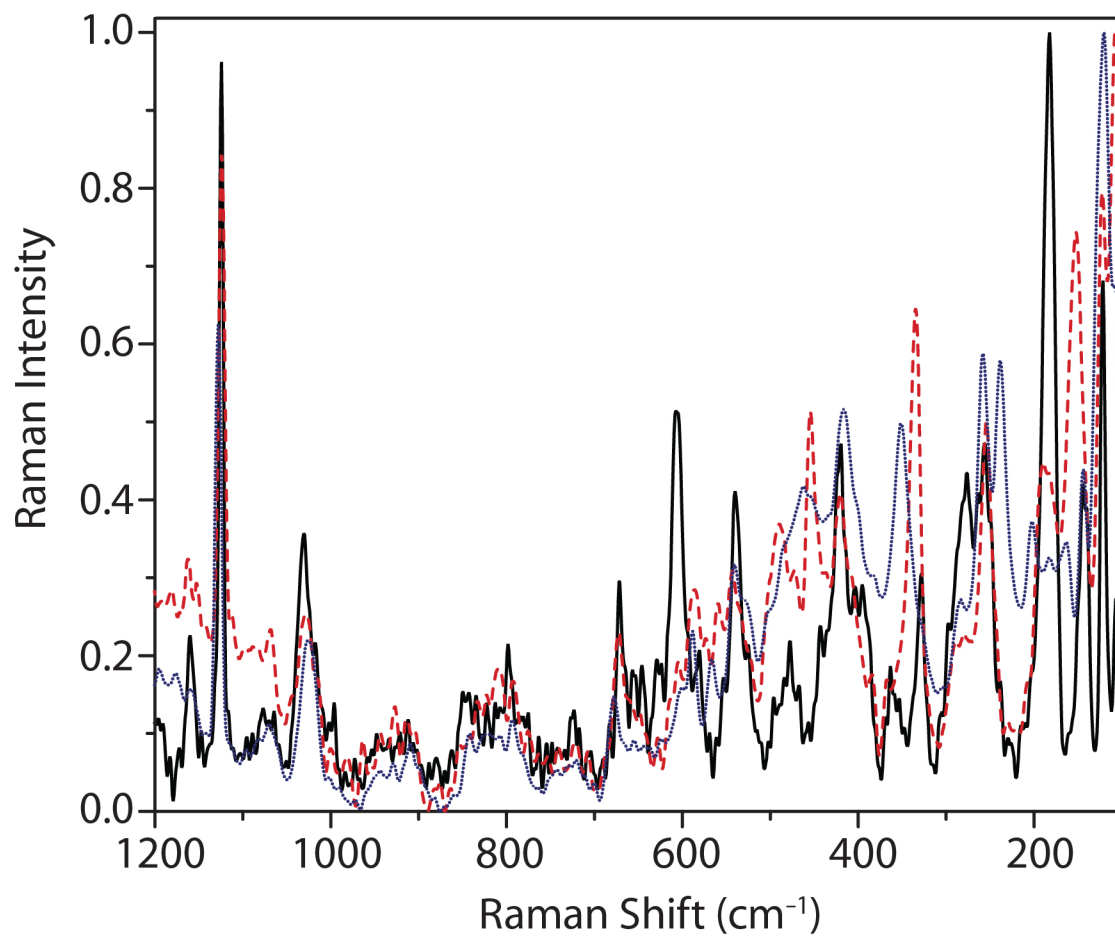

**Figure S3.** Raman spectra ( $\lambda_{\text{ex}} = 633\text{nm}$ ) of **2-Ti** (.....), **2-Zr** (----), and **2-Hf** (—) as powders at 20 °C are shown from 1200–100  $\text{cm}^{-1}$ .

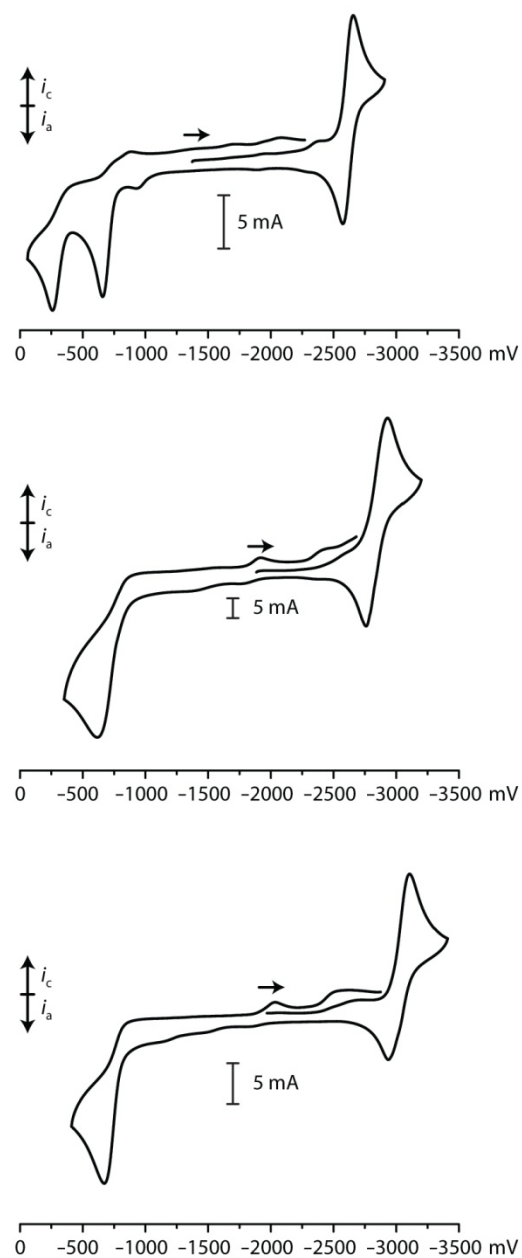

**Figure S4.** Cyclic voltammetry data for  $\text{Cp}^*\text{Ir}(\mu\text{-N}^t\text{Bu})\text{MCp}_2$  (**2-M**) are shown from Ti (top) to Zr (middle) to Hf (bottom). Data acquired in 0.1 M  $[\text{N}^t\text{Bu}_4][\text{PF}_6]/\text{THF}$  solution at 20 °C. Potentials are shown in reference to  $\text{Cp}_2\text{Fe}^{0/+}$ .

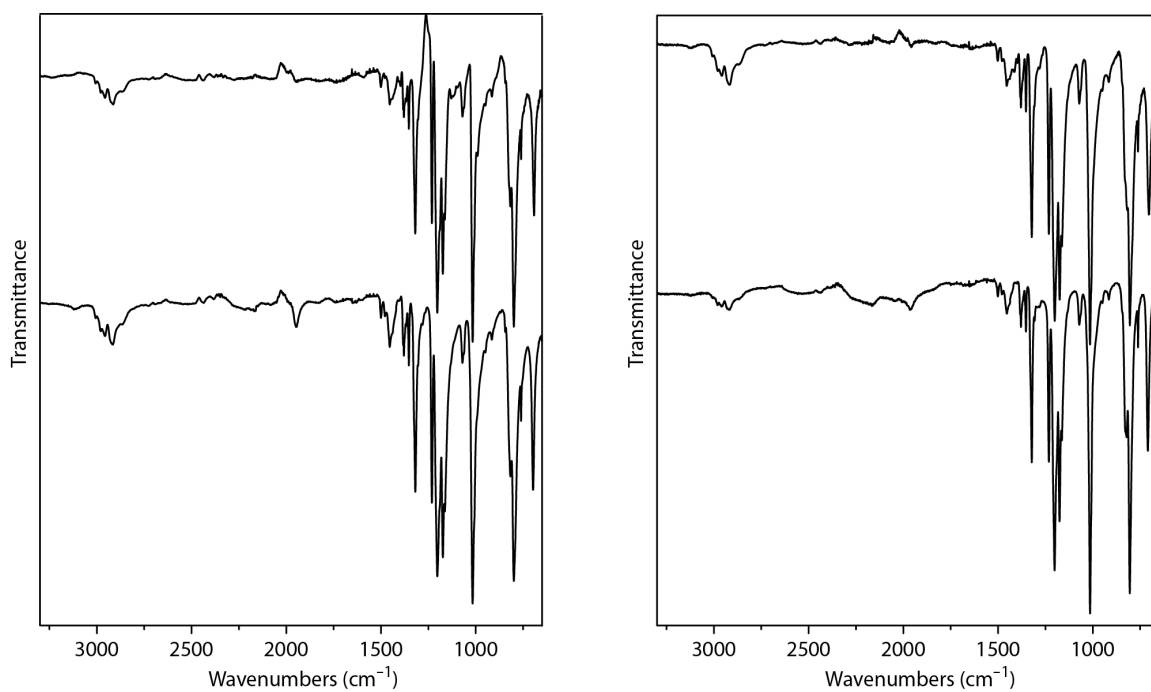

**Figure S5.** Infrared spectra (ATR) for  $\text{Cp}^*\text{Ir}(\mu\text{-N}'\text{Bu})(\mu\text{-D})\text{ZrCp}_2\text{OTf}$  (above) and  $\text{Cp}^*\text{Ir}(\mu\text{-N}'\text{Bu})(\mu\text{-H})\text{ZrCp}_2\text{OTf}$  (**3-Zr**, below) are shown on the left, while those for  $\text{Cp}^*\text{Ir}(\mu\text{-N}'\text{Bu})(\mu\text{-D})\text{HfCp}_2\text{OTf}$  (above) and  $\text{Cp}^*\text{Ir}(\mu\text{-N}'\text{Bu})(\mu\text{-H})\text{HfCp}_2\text{OTf}$  (**3-Hf**, below) are shown on the right.

**Table S3.** Infrared spectral data for  $\text{Cp}^*\text{Ir}(\mu\text{-N}^t\text{Bu})(\mu\text{-H})\text{MCp}_2\text{OTf}$  and  $\text{Cp}^*\text{Ir}(\mu\text{-N}^t\text{Bu})(\mu\text{-D})\text{MCp}_2\text{OTf}$  (M = Zr, Hf).

| $\text{Cp}^*\text{Ir}(\mu\text{-N}^t\text{Bu})$<br>$(\mu\text{-H})\text{ZrCp}_2\text{OTf}$ |               | $\text{Cp}^*\text{Ir}(\mu\text{-N}^t\text{Bu})$<br>$(\mu\text{-D})\text{ZrCp}_2\text{OTf}$ |               | $\text{Cp}^*\text{Ir}(\mu\text{-N}^t\text{Bu})$<br>$(\mu\text{-H})\text{HfCp}_2\text{OTf}$ |               | $\text{Cp}^*\text{Ir}(\mu\text{-N}^t\text{Bu})$<br>$(\mu\text{-D})\text{HfCp}_2\text{OTf}$ |               |
|--------------------------------------------------------------------------------------------|---------------|--------------------------------------------------------------------------------------------|---------------|--------------------------------------------------------------------------------------------|---------------|--------------------------------------------------------------------------------------------|---------------|
| Position<br>( $\text{cm}^{-1}$ )                                                           | Transmittance |
| 2915                                                                                       | 87            | 2913                                                                                       | 94            | 2919                                                                                       | 95            | 2919                                                                                       | 93            |
| 1948                                                                                       | 91            | —                                                                                          | —             | 1966                                                                                       | 95            | —                                                                                          | —             |
| 1454                                                                                       | 86            | 1454                                                                                       | 94            | 1454                                                                                       | 94            | 1454                                                                                       | 93            |
| 1379                                                                                       | 84            | 1379                                                                                       | 91            | 1379                                                                                       | 92            | 1379                                                                                       | 90            |
| 1353                                                                                       | 82            | 1353                                                                                       | 88            | 1353                                                                                       | 91            | 1353                                                                                       | 89            |
| 1319                                                                                       | 52            | 1319                                                                                       | 63            | 1322                                                                                       | 70            | 1322                                                                                       | 71            |
| 1231                                                                                       | 49            | 1231                                                                                       | 66            | 1232                                                                                       | 70            | 1232                                                                                       | 71            |
| 1203                                                                                       | 32            | 1203                                                                                       | 45            | 1202                                                                                       | 53            | 1201                                                                                       | 58            |
| 1173                                                                                       | 37            | 1173                                                                                       | 54            | 1176                                                                                       | 61            | 1175                                                                                       | 61            |
| 1070                                                                                       | 82            | 1070                                                                                       | 91            | 1071                                                                                       | 92            | 1071                                                                                       | 90            |
| 1016                                                                                       | 26            | 1016                                                                                       | 38            | 822                                                                                        | 74            | 1015                                                                                       | 55            |
|                                                                                            |               |                                                                                            |               | 805                                                                                        | 49            | 804                                                                                        | 57            |
|                                                                                            |               |                                                                                            |               | 761                                                                                        | 89            | 761                                                                                        | 83            |
|                                                                                            |               |                                                                                            |               | 709                                                                                        | 72            | 705                                                                                        | 74            |



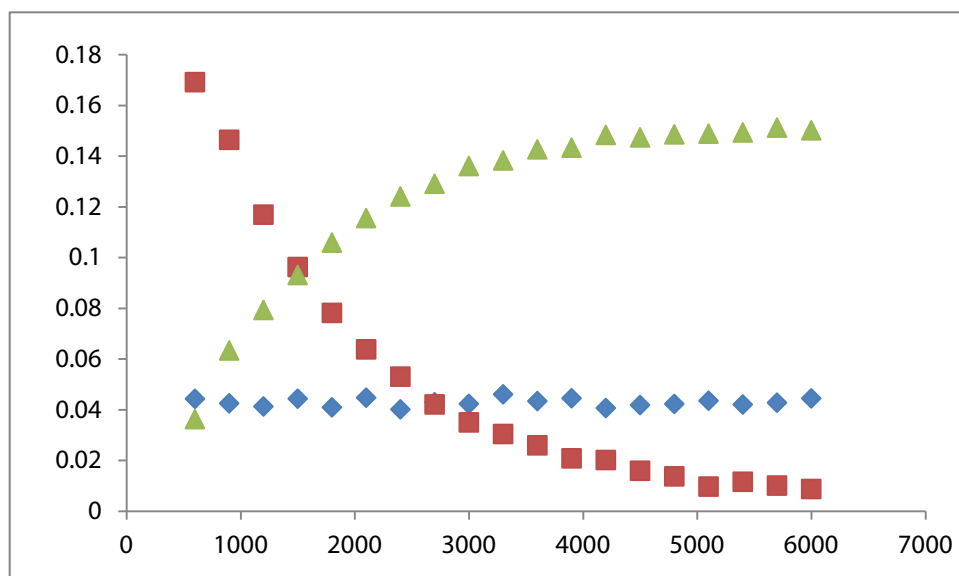

**Figure S6.** Integral intensities for the  $^1\text{H}$  NMR signals for Cp resonances of **4-Hf** (squares) and **6-Hf** (triangles), as well as the methyl resonance of 1,3,5-trimethoxybenzene (diamonds) at 130 °C as a function of time.

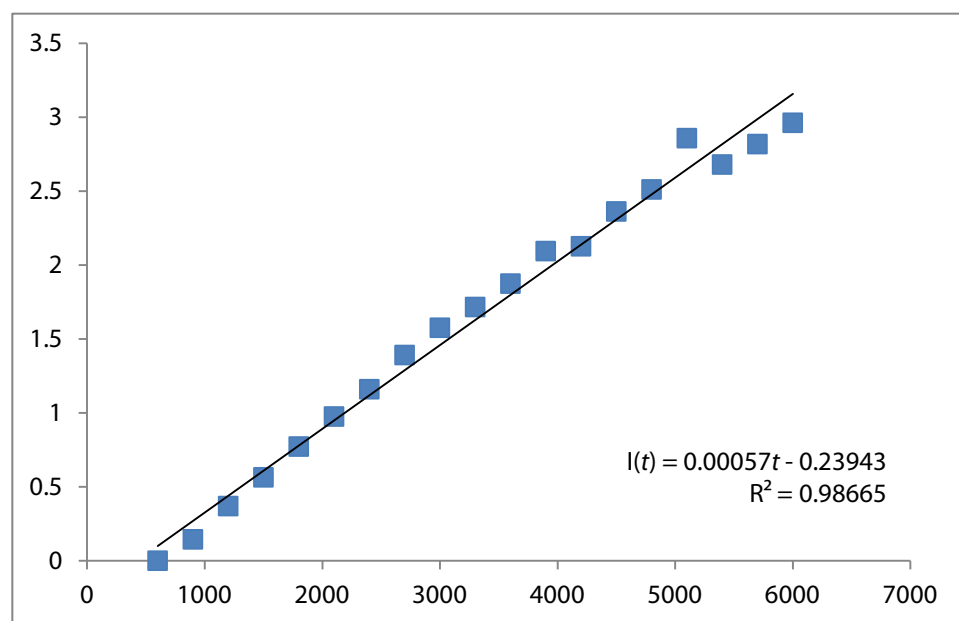

**Figure S7.** A fit to the natural log of the  $^1\text{H}$  NMR integral intensity for **4-Hf** as a function of time. The fit that is shown was used to determine the rate constant at 130 °C.

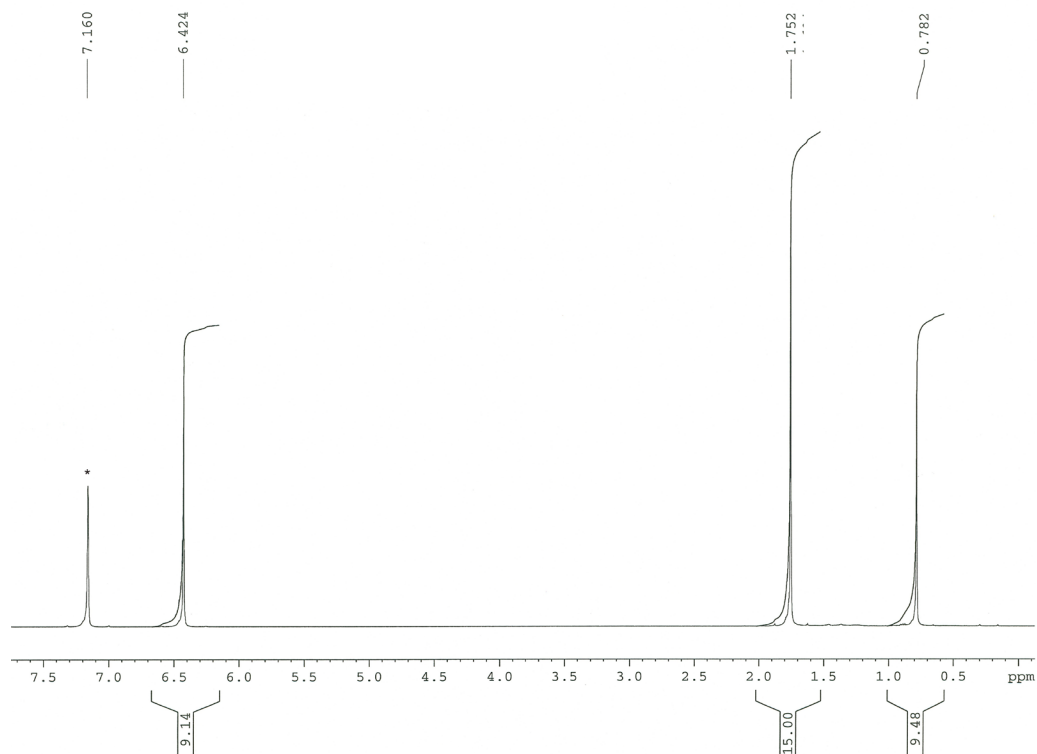

**Figure S8.**  $^1\text{H}$  NMR (400 MHz,  $\text{C}_6\text{D}_6$ , 20 °C) spectrum of  $\text{Cp}^*\text{Ir}(\mu\text{-N}^i\text{Bu})\text{TiCp}_2$  (**2-Ti**).

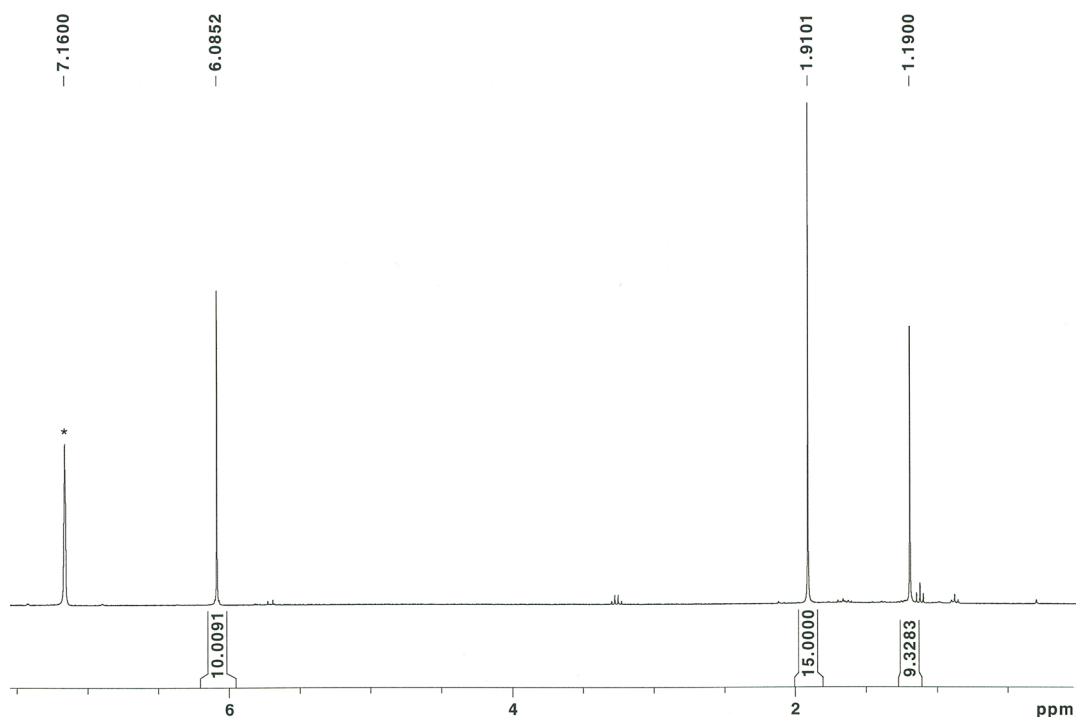

**Figure S9.**  $^1\text{H}$  NMR (400 MHz,  $\text{C}_6\text{D}_6$ , 20 °C) spectrum of  $\text{Cp}^*\text{Ir}(\mu\text{-N}^i\text{Bu})\text{HfCp}_2$  (**2-Hf**).

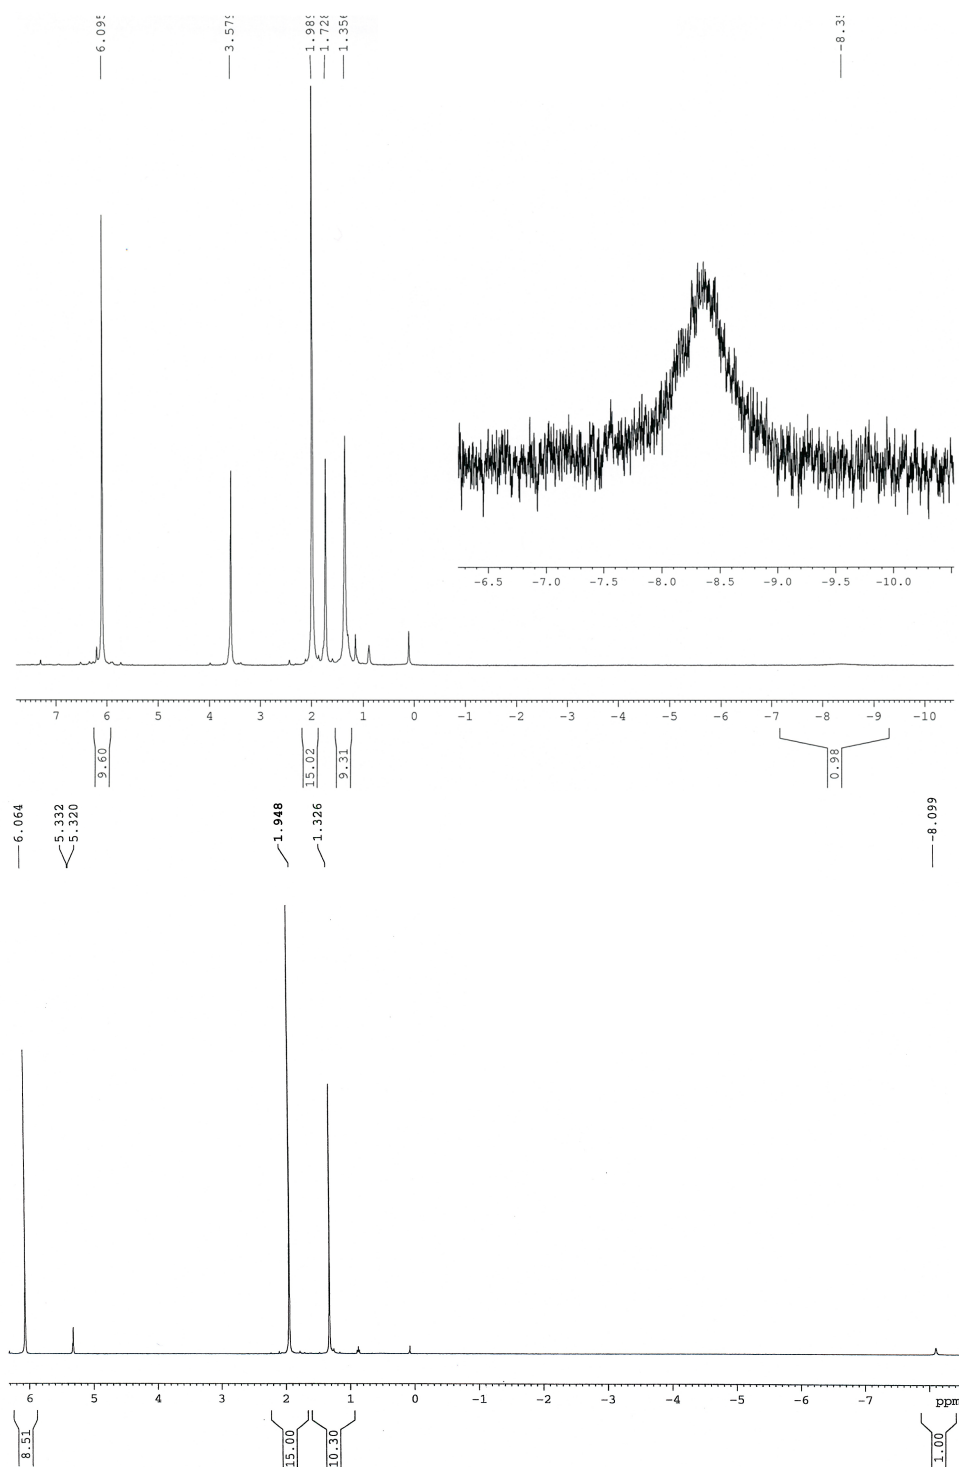

**Figure S10.** <sup>1</sup>H NMR (500 MHz, 20 °C) spectrum of Cp\*Ir(μ-N<sup>t</sup>Bu)(μ-H)ZrCp<sub>2</sub>OTf (3-Zr) in *d*<sub>8</sub>-THF (top) and CD<sub>2</sub>Cl<sub>2</sub>. (bottom).

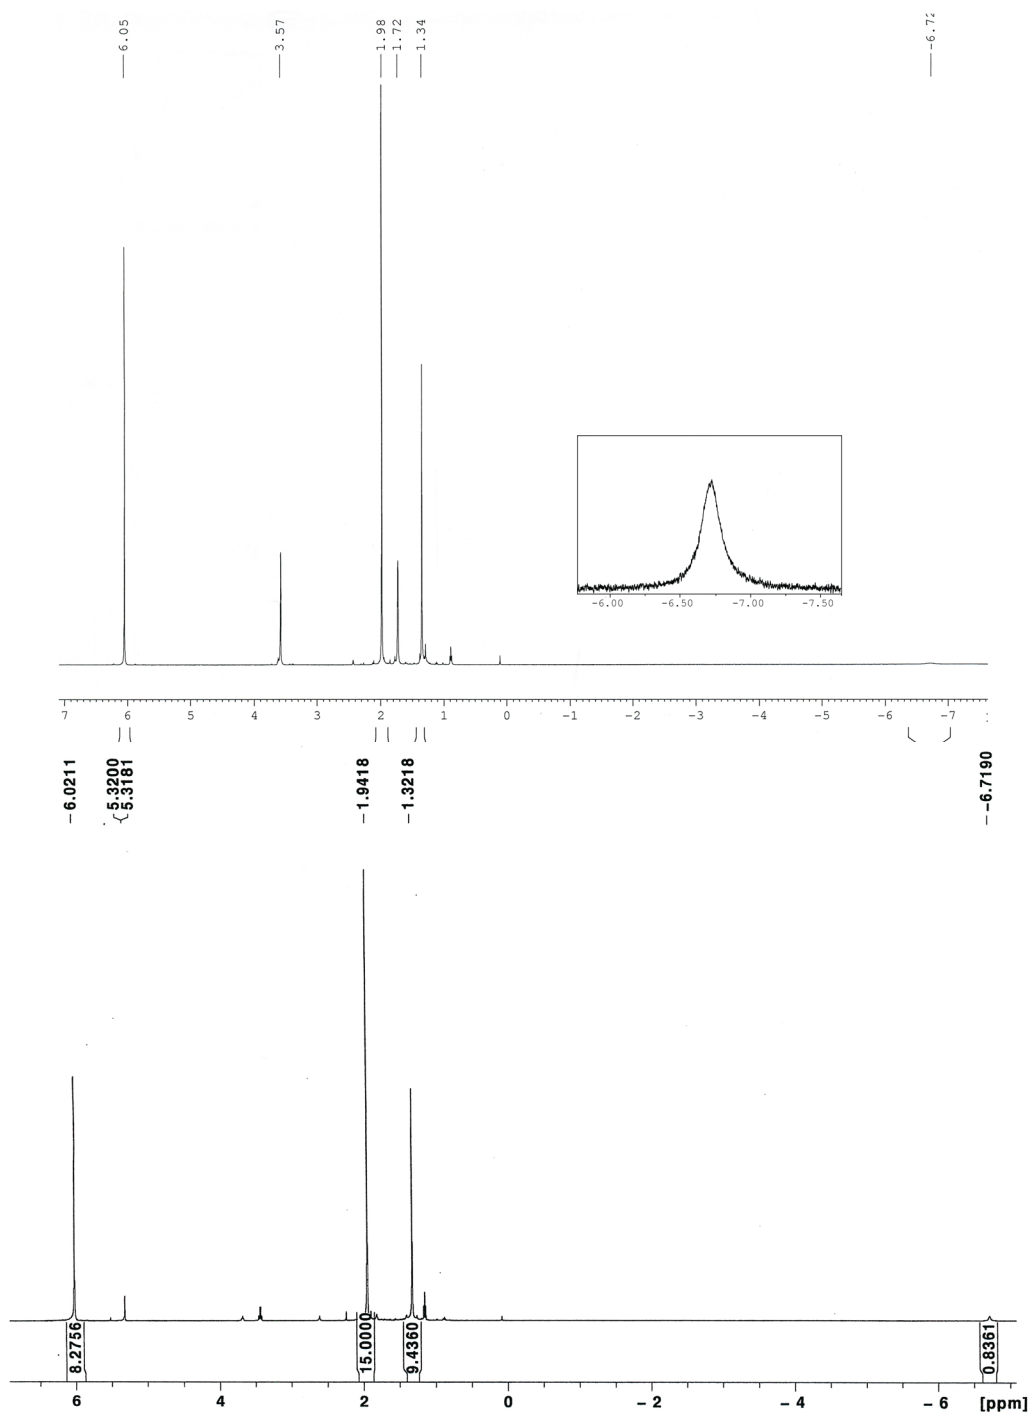

**Figure S11.** <sup>1</sup>H NMR (500 MHz, 20 °C) spectrum of Cp\*Ir(μ-N<sup>t</sup>Bu)(μ-H)HfCp<sub>2</sub>OTf (3-Hf) in *d*<sub>8</sub>-THF (top) and CD<sub>2</sub>Cl<sub>2</sub> (bottom).

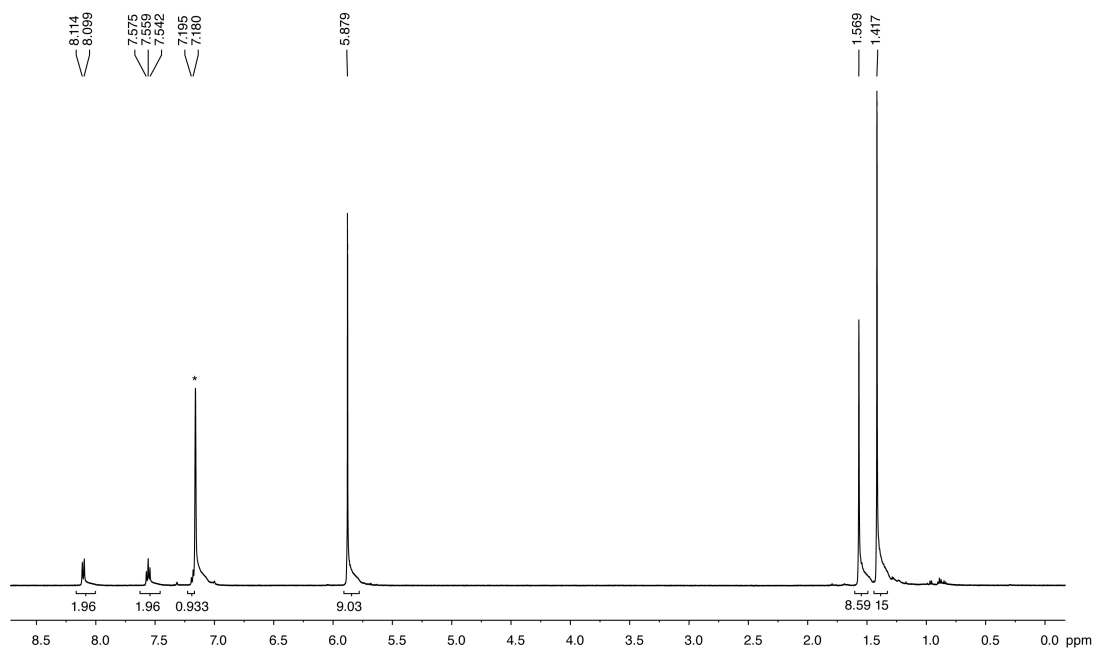

**Figure S12.** <sup>1</sup>H NMR (300 MHz, C<sub>6</sub>D<sub>6</sub>, 20 °C) spectrum of Cp\*Ir(μ-N<sup>i</sup>Bu)(μ-N<sub>3</sub>Ph)HfCp<sub>2</sub> (**4-Hf**).

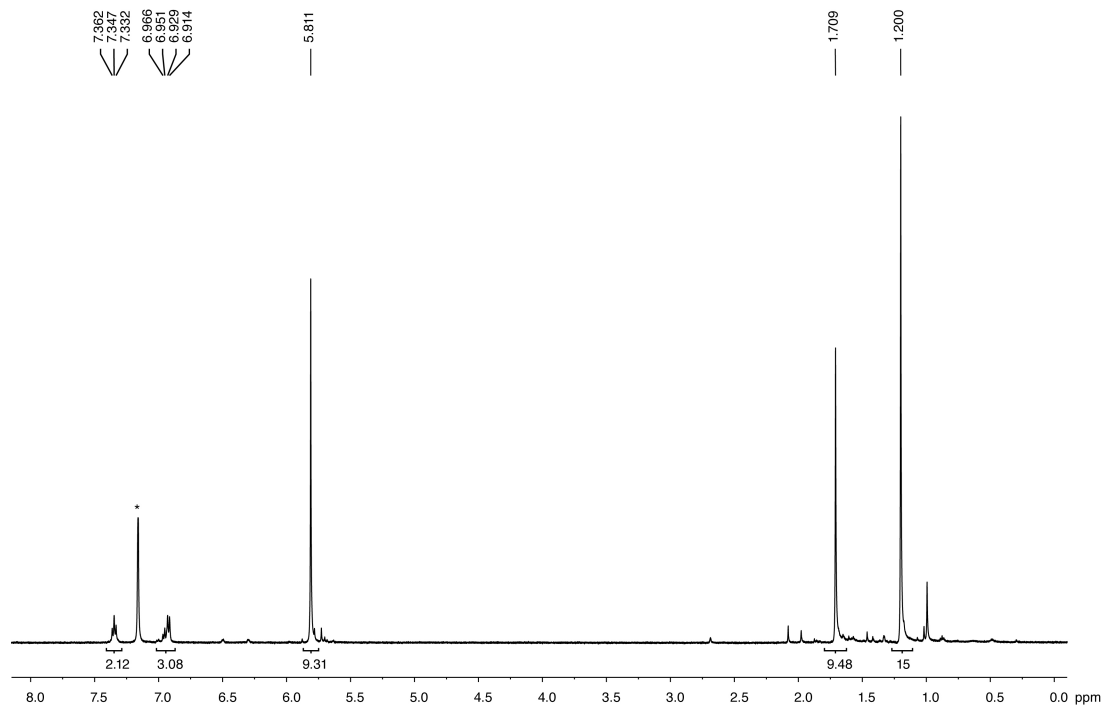

**Figure S13.** <sup>1</sup>H NMR (500 MHz, C<sub>6</sub>D<sub>6</sub>, 20 °C) spectrum of Cp\*Ir(μ-N<sup>i</sup>Bu)(μ-NPh)HfCp<sub>2</sub> (**5-Hf**).

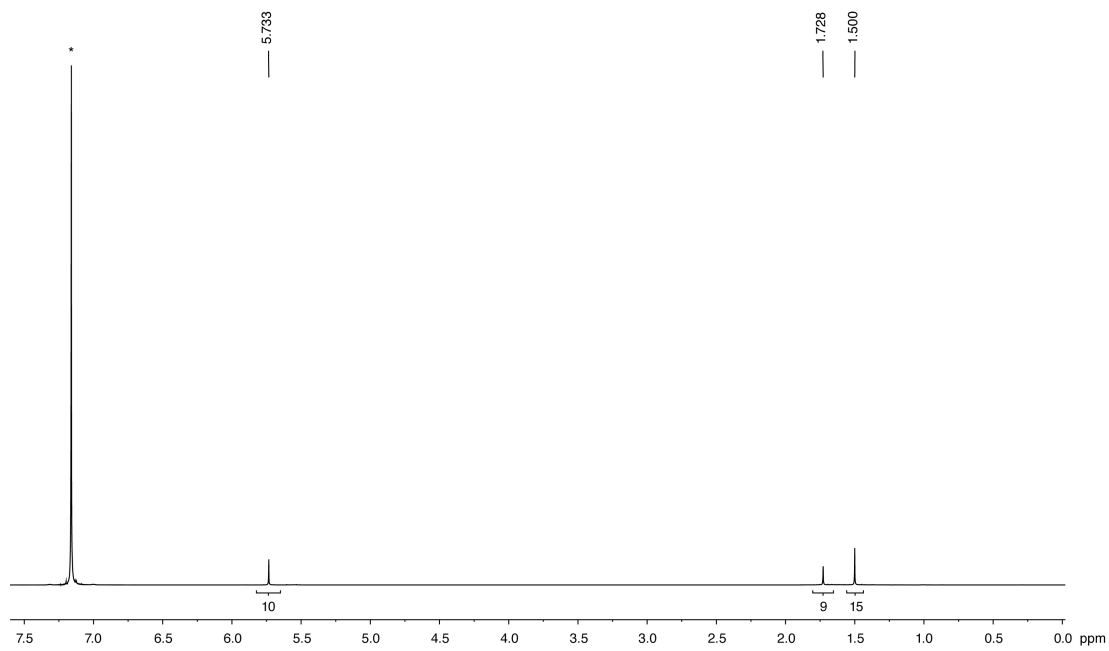

**Figure S14.**  $^1\text{H}$  NMR (500 MHz,  $\text{C}_6\text{D}_6$ , 20 °C) spectrum of  $\text{Cp}^*\text{Ir}(\mu\text{-N}^t\text{Bu})(\mu\text{-S})\text{HfCp}_2$  (**6-Hf**).



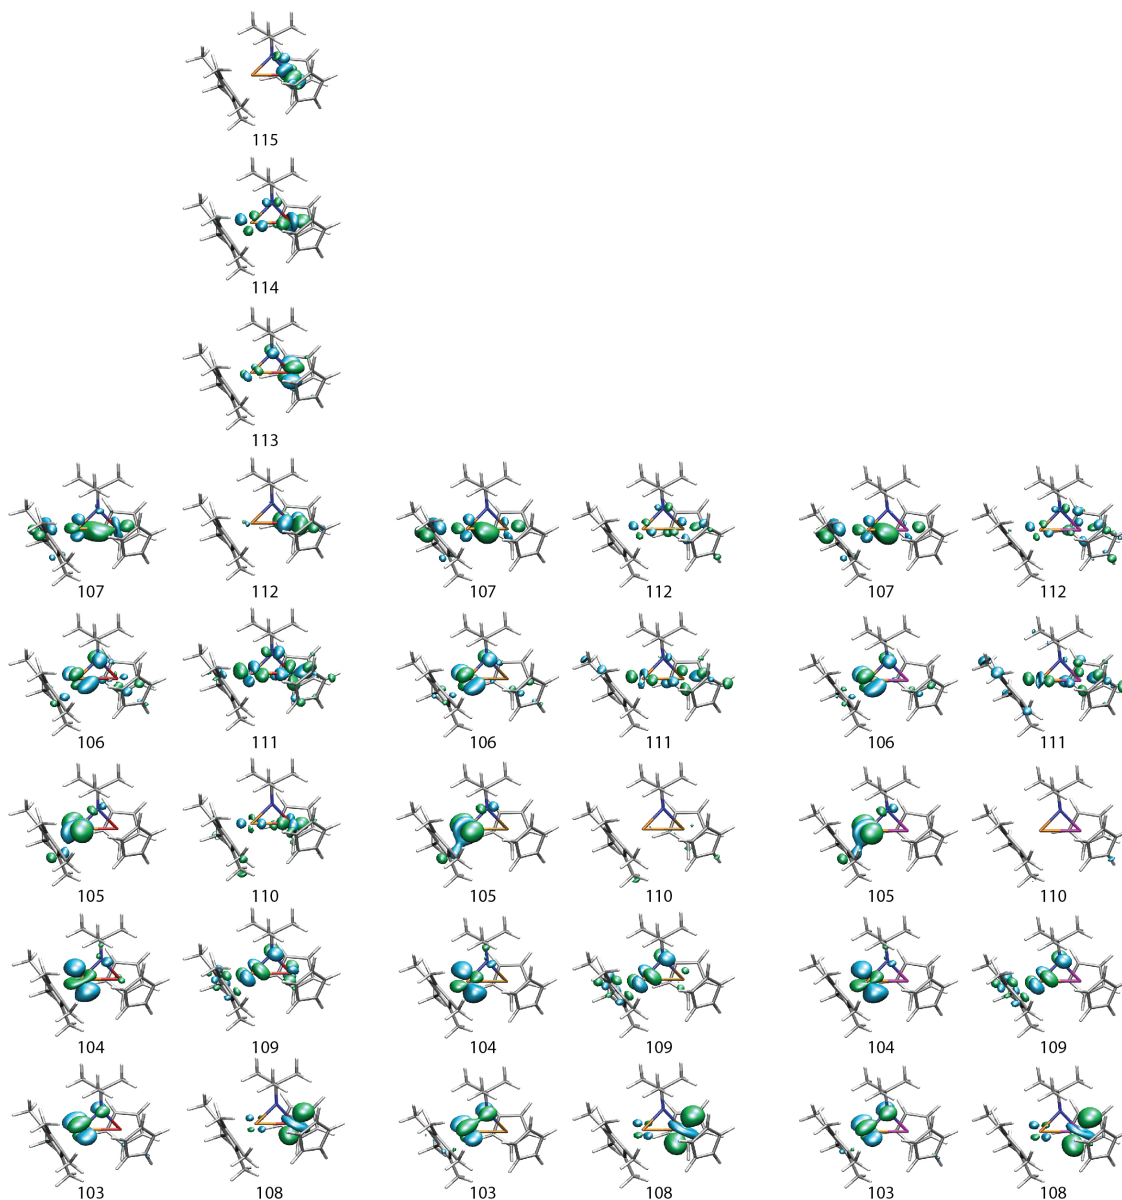

**Figure S15.** Orbital contour plots for **2-Ti** (left), **2-Zr** (center), and **2-Hf** (right), calculated using the B3LYP functional. In each case, orbital 107 is the HOMO and orbital 108 is the LUMO. These orbitals were rendered at an isosurface value of 0.04, except for orbitals 110–112 for **2-Zr** and **2-Hf**. Because these orbitals are delocalized they were rendered at a value of 0.08. In particular, for both **2-Zr** and **2-Hf** orbital 110 is highly delocalized and contains density in the C-H bonds of the Cp and Cp\* ligands.

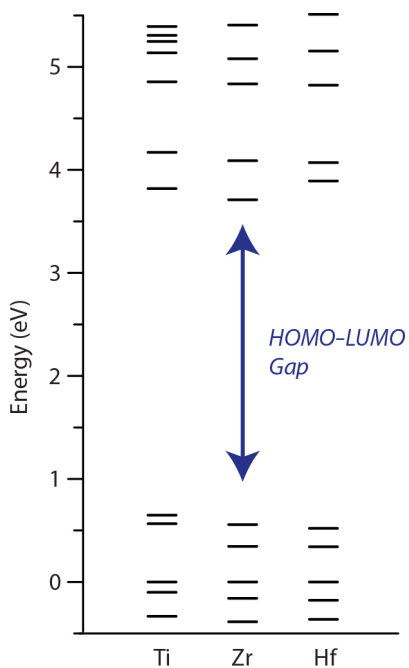

**Figure 16.** Frontier orbital energies for  $\text{Cp}^*\text{Ir}(\mu\text{-N}^t\text{Bu})\text{MCp}_2$  (**2-M**). For each, the energy of orbital 105 is arbitrarily set to 0 eV because this has little contribution from the group 4 metal.

**Table S4.** Optimized geometries for Cp\*Ir( $\mu$ -N<sup>t</sup>Bu)TiCp<sub>2</sub> (**2**-Ti) in Cartesian coordinates (Å).

| Atom | B3LYP   |         |         | PW91PW91 |         |         |
|------|---------|---------|---------|----------|---------|---------|
|      | x       | y       | z       | x        | y       | z       |
| Ir   | -0.7028 | -0.0032 | -0.0314 | -0.6926  | -0.0132 | -0.0296 |
| Ti   | 1.8416  | -0.2914 | -0.0018 | 1.8308   | -0.2979 | -0.0013 |
| N    | 0.6851  | 1.2873  | -0.0494 | 0.6811   | 1.2967  | -0.0576 |
| C    | 0.7075  | 2.7582  | -0.0256 | 0.6785   | 2.7673  | -0.0388 |
| C    | 0.1881  | 3.2476  | 1.3427  | 0.1713   | 3.2437  | 1.3397  |
| C    | 2.1449  | 3.2756  | -0.2437 | 2.1051   | 3.3033  | -0.2837 |
| C    | -0.1993 | 3.3132  | -1.1421 | -0.2630  | 3.2981  | -1.1392 |
| C    | -2.3679 | -1.0113 | -1.1463 | -2.3364  | -1.0258 | -1.1454 |
| C    | -2.3460 | -1.4418 | -2.5847 | -2.3077  | -1.4589 | -2.5816 |
| C    | -2.9887 | 0.2234  | -0.6677 | -2.9729  | 0.2097  | -0.6685 |
| C    | -3.6002 | 1.2686  | -1.5535 | -3.5928  | 1.2453  | -1.5573 |
| C    | -2.9382 | 0.2118  | 0.7399  | -2.9179  | 0.2045  | 0.7464  |
| C    | -3.4749 | 1.2489  | 1.6822  | -3.4517  | 1.2440  | 1.6857  |
| C    | -2.2894 | -1.0328 | 1.1562  | -2.2544  | -1.0385 | 1.1693  |
| C    | -2.1703 | -1.4895 | 2.5816  | -2.1249  | -1.4839 | 2.5959  |
| C    | -2.0468 | -1.8304 | -0.0128 | -2.0064  | -1.8445 | -0.0033 |
| C    | -1.5927 | -3.2618 | -0.0460 | -1.5271  | -3.2665 | -0.0352 |
| C    | 2.1619  | 0.1985  | -2.3711 | 2.1535   | 0.2278  | -2.3398 |
| C    | 3.4615  | 0.0684  | -1.8177 | 3.4543   | 0.0559  | -1.7852 |
| C    | 3.6378  | -1.2813 | -1.4262 | 3.5957   | -1.3078 | -1.4100 |
| C    | 2.4285  | -1.9684 | -1.6748 | 2.3614   | -1.9614 | -1.6660 |
| C    | 1.5143  | -1.0542 | -2.2759 | 1.4693   | -1.0138 | -2.2608 |
| C    | 1.5126  | -0.3115 | 2.4834  | 1.4942   | -0.2677 | 2.4572  |
| C    | 2.6844  | 0.4171  | 2.1903  | 2.6700   | 0.4599  | 2.1440  |
| C    | 3.6268  | -0.4763 | 1.6032  | 3.6150   | -0.4473 | 1.5691  |
| C    | 3.0269  | -1.7577 | 1.5436  | 3.0128   | -1.7362 | 1.5364  |
| C    | 1.7083  | -1.6467 | 2.0571  | 1.6913   | -1.6155 | 2.0557  |
| H    | 0.1769  | 4.3429  | 1.3875  | 0.1296   | 4.3443  | 1.3843  |
| H    | -0.8272 | 2.8778  | 1.5102  | -0.8353  | 2.8387  | 1.5222  |
| H    | 0.8214  | 2.8784  | 2.1549  | 0.8329   | 2.8895  | 2.1444  |
| H    | 2.8199  | 2.9008  | 0.5321  | 2.8004   | 2.9378  | 0.4880  |
| H    | 2.5321  | 2.9574  | -1.2163 | 2.4825   | 2.9786  | -1.2652 |
| H    | 2.1724  | 4.3706  | -0.2126 | 2.1192   | 4.4048  | -0.2609 |
| H    | -0.2145 | 4.4093  | -1.1214 | -0.3176  | 4.3988  | -1.1104 |
| H    | 0.1581  | 2.9949  | -2.1268 | 0.0921   | 2.9957  | -2.1367 |
| H    | -1.2204 | 2.9447  | -1.0175 | -1.2721  | 2.8841  | -0.9974 |
| H    | -3.3307 | -1.8169 | -2.8961 | -3.2964  | -1.8366 | -2.8993 |
| H    | -2.0865 | -0.6118 | -3.2482 | -2.0437  | -0.6248 | -3.2490 |
| H    | -1.6244 | -2.2450 | -2.7544 | -1.5819  | -2.2682 | -2.7470 |
| H    | -2.9808 | 1.4619  | -2.4343 | -2.9656  | 1.4510  | -2.4382 |
| H    | -3.7343 | 2.2177  | -1.0279 | -3.7473  | 2.1970  | -1.0283 |
| H    | -4.5880 | 0.9496  | -1.9134 | -4.5779  | 0.9107  | -1.9291 |
| H    | -3.6211 | 2.2112  | 1.1848  | -3.6109  | 2.2070  | 1.1794  |
| H    | -4.4443 | 0.9409  | 2.0973  | -4.4188  | 0.9325  | 2.1194  |
| H    | -2.7979 | 1.4111  | 2.5261  | -2.7603  | 1.4181  | 2.5241  |
| H    | -1.8881 | -0.6668 | 3.2450  | -1.8371  | -0.6501 | 3.2538  |
| H    | -1.4191 | -2.2754 | 2.6899  | -1.3681  | -2.2733 | 2.7054  |
| H    | -3.1250 | -1.8930 | 2.9463  | -3.0818  | -1.8873 | 2.9736  |
| H    | -1.0023 | -3.4760 | -0.9410 | -0.9234  | -3.4678 | -0.9327 |
| H    | -0.9736 | -3.5084 | 0.8207  | -0.9034  | -3.5026 | 0.8393  |
| H    | -2.4505 | -3.9489 | -0.0435 | -2.3750  | -3.9754 | -0.0381 |
| H    | 1.7179  | 1.1088  | -2.7453 | 1.7291   | 1.1605  | -2.7011 |
| H    | 4.1977  | 0.8571  | -1.7245 | 4.2125   | 0.8302  | -1.6739 |
| H    | 4.5210  | -1.6940 | -0.9593 | 4.4710   | -1.7513 | -0.9411 |
| H    | 2.2326  | -3.0116 | -1.4598 | 2.1336   | -3.0053 | -1.4528 |
| H    | 0.5172  | -1.2815 | -2.6164 | 0.4572   | -1.2079 | -2.5987 |
| H    | 0.5932  | 0.0962  | 2.8752  | 0.5657   | 0.1501  | 2.8358  |
| H    | 2.8427  | 1.4698  | 2.3793  | 2.8280   | 1.5233  | 2.3102  |
| H    | 4.6310  | -0.2240 | 1.2897  | 4.6218   | -0.1982 | 1.2393  |
| H    | 3.4779  | -2.6575 | 1.1492  | 3.4631   | -2.6479 | 1.1505  |
| H    | 0.9833  | -2.4462 | 2.1223  | 0.9603   | -2.4175 | 2.1320  |

**Table S5.** Optimized geometries for Cp\*Ir( $\mu$ -N<sup>t</sup>Bu)ZrCp<sub>2</sub> (**2-Zr**) in Cartesian coordinates (Å).

| Atom | B3LYP   |         |         | PW91PW91 |         |         |
|------|---------|---------|---------|----------|---------|---------|
|      | x       | y       | z       | x        | y       | z       |
| Ir   | -0.8453 | -0.0284 | -0.0261 | -0.8465  | -0.0264 | -0.0357 |
| Zr   | 1.7910  | -0.1901 | -0.0043 | 1.7700   | -0.2156 | -0.0055 |
| N    | 0.4416  | 1.4060  | 0.0062  | 0.4275   | 1.4073  | -0.0889 |
| C    | 0.2800  | 2.8654  | 0.0557  | 0.2821   | 2.8690  | -0.0854 |
| C    | 1.6592  | 3.5419  | -0.0841 | 1.6391   | 3.5149  | -0.4357 |
| C    | -0.6337 | 3.3338  | -1.0939 | -0.7798  | 3.2957  | -1.1176 |
| C    | -0.3495 | 3.2601  | 1.4077  | -0.1577  | 3.3174  | 1.3253  |
| C    | -2.4062 | -1.1862 | -1.1403 | -2.3833  | -1.2781 | -1.0572 |
| C    | -2.2905 | -1.6851 | -2.5522 | -2.2693  | -1.8746 | -2.4296 |
| C    | -3.2120 | -0.0220 | -0.7457 | -3.1883  | -0.0845 | -0.7397 |
| C    | -3.8825 | 0.9043  | -1.7163 | -3.8701  | 0.7654  | -1.7686 |
| C    | -3.2233 | 0.0431  | 0.6497  | -3.1863  | 0.0845  | 0.6575  |
| C    | -3.9106 | 1.0546  | 1.5190  | -3.8523  | 1.1662  | 1.4533  |
| C    | -2.4159 | -1.0758 | 1.1554  | -2.3696  | -0.9981 | 1.2377  |
| C    | -2.3016 | -1.4397 | 2.6076  | -2.2231  | -1.2494 | 2.7098  |
| C    | -2.0546 | -1.9147 | 0.0446  | -2.0120  | -1.9193 | 0.1801  |
| C    | -1.4989 | -3.3085 | 0.1164  | -1.4218  | -3.2901 | 0.3436  |
| C    | 2.6291  | 0.4719  | 2.3606  | 2.6655   | 0.6576  | 2.2432  |
| C    | 1.5690  | -0.4364 | 2.5948  | 1.5714   | -0.1819 | 2.5941  |
| C    | 1.9692  | -1.7102 | 2.1147  | 1.9102   | -1.5168 | 2.2371  |
| C    | 3.2953  | -1.5989 | 1.6142  | 3.2306   | -1.5127 | 1.6922  |
| C    | 3.6996  | -0.2473 | 1.7494  | 3.6951   | -0.1667 | 1.6851  |
| C    | 2.7272  | -1.7425 | -1.8606 | 2.6261   | -1.8613 | -1.7722 |
| C    | 3.7971  | -0.8591 | -1.5775 | 3.7369   | -1.0064 | -1.5270 |
| C    | 3.4007  | 0.4475  | -1.9705 | 3.3879   | 0.3030  | -1.9708 |
| C    | 2.1024  | 0.3608  | -2.5398 | 2.0796   | 0.2443  | -2.5351 |
| C    | 1.6769  | -0.9864 | -2.4655 | 1.6005   | -1.0876 | -2.4092 |
| H    | 2.3277  | 3.2285  | 0.7254  | 2.4105   | 3.2080  | 0.2900  |
| H    | 2.1254  | 3.2747  | -1.0384 | 1.9693   | 3.2045  | -1.4393 |
| H    | 1.5710  | 4.6335  | -0.0445 | 1.5738   | 4.6148  | -0.4211 |
| H    | -0.1898 | 3.0890  | -2.0645 | -0.4752  | 2.9941  | -2.1320 |
| H    | -0.7932 | 4.4178  | -1.0525 | -0.9280  | 4.3879  | -1.1060 |
| H    | -1.6020 | 2.8307  | -1.0293 | -1.7363  | 2.8011  | -0.8911 |
| H    | -0.4765 | 4.3466  | 1.4816  | -0.2902  | 4.4107  | 1.3688  |
| H    | -1.3279 | 2.7838  | 1.5171  | -1.1089  | 2.8309  | 1.5890  |
| H    | 0.2831  | 2.9298  | 2.2382  | 0.5930   | 3.0277  | 2.0769  |
| H    | -2.0847 | -0.8686 | -3.2506 | -2.0814  | -1.1027 | -3.1912 |
| H    | -3.2216 | -2.1704 | -2.8773 | -3.1988  | -2.4009 | -2.7134 |
| H    | -1.4874 | -2.4199 | -2.6507 | -1.4498  | -2.6060 | -2.4807 |
| H    | -3.2187 | 1.1635  | -2.5471 | -3.2089  | 0.9701  | -2.6247 |
| H    | -4.1971 | 1.8359  | -1.2387 | -4.1910  | 1.7320  | -1.3547 |
| H    | -4.7774 | 0.4392  | -2.1514 | -4.7684  | 0.2611  | -2.1672 |
| H    | -4.1952 | 1.9472  | 0.9555  | -4.1468  | 2.0149  | 0.8192  |
| H    | -4.8263 | 0.6405  | 1.9626  | -4.7635  | 0.7957  | 1.9558  |
| H    | -3.2707 | 1.3762  | 2.3470  | -3.1852  | 1.5546  | 2.2387  |
| H    | -2.1558 | -0.5524 | 3.2306  | -2.1403  | -0.3058 | 3.2694  |
| H    | -3.2116 | -1.9445 | 2.9612  | -3.0969  | -1.7957 | 3.1092  |
| H    | -1.4597 | -2.1133 | 2.7848  | -1.3268  | -1.8474 | 2.9278  |
| H    | -0.8767 | -3.4493 | 1.0044  | -0.7742  | -3.3453 | 1.2306  |
| H    | -0.8846 | -3.5430 | -0.7569 | -0.8129  | -3.5731 | -0.5278 |
| H    | -2.3079 | -4.0518 | 0.1606  | -2.2125  | -4.0538 | 0.4605  |
| H    | 2.6349  | 1.5223  | 2.6198  | 2.7185   | 1.7348  | 2.3910  |
| H    | 0.6020  | -0.1917 | 3.0080  | 0.6178   | 0.1466  | 2.9985  |
| H    | 1.3730  | -2.6138 | 2.1409  | 1.2739   | -2.3921 | 2.3627  |
| H    | 3.8830  | -2.4009 | 1.1871  | 3.7774   | -2.3827 | 1.3325  |
| H    | 4.6618  | 0.1616  | 1.4678  | 4.6688   | 0.1744  | 1.3366  |
| H    | 2.7190  | -2.8107 | -1.6800 | 2.5744   | -2.9253 | -1.5412 |
| H    | 4.7379  | -1.1239 | -1.1140 | 4.6707   | -1.2897 | -1.0453 |
| H    | 3.9986  | 1.3466  | -1.8811 | 4.0195   | 1.1891  | -1.9082 |
| H    | 1.5184  | 1.1874  | -2.9191 | 1.5185   | 1.0832  | -2.9401 |
| H    | 0.7318  | -1.3728 | -2.8170 | 0.6323   | -1.4501 | -2.7424 |

**Table S6.** Optimized geometries for Cp\*Ir( $\mu$ -N<sup>t</sup>Bu)HfCp<sub>2</sub> (**2**-Hf) in Cartesian coordinates (Å).

| Atom | B3LYP    |          |          | PW91PW91 |         |         |
|------|----------|----------|----------|----------|---------|---------|
|      | x        | y        | z        | x        | y       | z       |
| Ir   | -1.01582 | -0.03158 | -0.01986 | -1.0143  | -0.0364 | -0.0272 |
| Hf   | 1.610589 | -0.14913 | -0.00317 | 1.5997   | -0.1666 | -0.0033 |
| N    | 0.265094 | 1.429252 | -0.05194 | 0.2496   | 1.4252  | -0.0965 |
| C    | 0.067979 | 2.884653 | -0.05477 | 0.0641   | 2.8820  | -0.1133 |
| C    | 1.429749 | 3.589843 | -0.22424 | 1.4061   | 3.5606  | -0.4616 |
| C    | -0.85933 | 3.291143 | -1.2172  | -0.9997  | 3.2668  | -1.1598 |
| C    | -0.5674  | 3.314273 | 1.284038 | -0.3992  | 3.3392  | 1.2872  |
| C    | -2.57098 | -1.22758 | -1.09014 | -2.5436  | -1.2811 | -1.0524 |
| C    | -2.45287 | -1.76969 | -2.48617 | -2.4180  | -1.8784 | -2.4236 |
| C    | -3.41183 | -0.07513 | -0.72826 | -3.3707  | -0.0993 | -0.7397 |
| C    | -4.10335 | 0.802824 | -1.72836 | -4.0534  | 0.7413  | -1.7753 |
| C    | -3.41971 | 0.033279 | 0.6614   | -3.3768  | 0.0714  | 0.6549  |
| C    | -4.12127 | 1.057663 | 1.503385 | -4.0565  | 1.1469  | 1.4473  |
| C    | -2.57555 | -1.04542 | 1.199556 | -2.5444  | -0.9981 | 1.2409  |
| C    | -2.44301 | -1.35571 | 2.662761 | -2.4018  | -1.2438 | 2.7144  |
| C    | -2.203   | -1.9141  | 0.11529  | -2.1760  | -1.9205 | 0.1879  |
| C    | -1.6272  | -3.29756 | 0.22422  | -1.5930  | -3.2940 | 0.3557  |
| C    | 2.60424  | 0.657641 | 2.260631 | 2.5170   | 0.7537  | 2.2150  |
| C    | 1.506634 | -0.16075 | 2.621265 | 1.4454   | -0.1024 | 2.5921  |
| C    | 1.803698 | -1.49091 | 2.228599 | 1.8038   | -1.4353 | 2.2427  |
| C    | 3.1066   | -1.50355 | 1.657589 | 3.1169   | -1.4121 | 1.6818  |
| C    | 3.598219 | -0.17429 | 1.664462 | 3.5540   | -0.0570 | 1.6501  |
| C    | 2.390112 | -1.79489 | -1.8635  | 2.4867   | -1.8332 | -1.7392 |
| C    | 3.566455 | -1.07819 | -1.53485 | 3.5933   | -0.9735 | -1.4948 |
| C    | 3.363816 | 0.281599 | -1.88707 | 3.2425   | 0.3329  | -1.9454 |
| C    | 2.078709 | 0.392833 | -2.48897 | 1.9384   | 0.2662  | -2.5213 |
| C    | 1.47167  | -0.8856  | -2.46907 | 1.4624   | -1.0671 | -2.3879 |
| H    | 2.107487 | 3.32533  | 0.594681 | 2.1791   | 3.2881  | 0.2760  |
| H    | 1.901595 | 3.297054 | -1.16829 | 1.7547   | 3.2426  | -1.4566 |
| H    | 1.314714 | 4.679621 | -0.22745 | 1.3102   | 4.6583  | -0.4667 |
| H    | -0.41804 | 3.009291 | -2.17897 | -0.6840  | 2.9458  | -2.1648 |
| H    | -1.03251 | 4.373802 | -1.22181 | -1.1671  | 4.3562  | -1.1749 |
| H    | -1.82113 | 2.779934 | -1.12467 | -1.9487  | 2.7609  | -0.9265 |
| H    | -0.72479 | 4.398859 | 1.316877 | -0.5601  | 4.4293  | 1.3143  |
| H    | -1.53133 | 2.814428 | 1.416018 | -1.3401  | 2.8319  | 1.5492  |
| H    | 0.077142 | 3.034102 | 2.123681 | 0.3517   | 3.0795  | 2.0496  |
| H    | -2.27255 | -0.9717  | -3.21288 | -2.2326  | -1.1055 | -3.1850 |
| H    | -3.37417 | -2.28749 | -2.78828 | -3.3415  | -2.4129 | -2.7118 |
| H    | -1.63278 | -2.48773 | -2.56672 | -1.5919  | -2.6026 | -2.4694 |
| H    | -3.43687 | 1.070079 | -2.5547  | -3.3809  | 0.9676  | -2.6173 |
| H    | -4.46228 | 1.731308 | -1.27688 | -4.4053  | 1.6972  | -1.3615 |
| H    | -4.97126 | 0.292832 | -2.16768 | -4.9313  | 0.2187  | -2.1950 |
| H    | -4.46242 | 1.908266 | 0.907449 | -4.3697  | 1.9863  | 0.8095  |
| H    | -5.00274 | 0.629447 | 1.999467 | -4.9581  | 0.7646  | 1.9581  |
| H    | -3.46787 | 1.446052 | 2.291542 | -3.3916  | 1.5515  | 2.2264  |
| H    | -2.33414 | -0.44223 | 3.254766 | -2.3204  | -0.2977 | 3.2701  |
| H    | -3.32807 | -1.88886 | 3.037567 | -3.2761  | -1.7891 | 3.1144  |
| H    | -1.56944 | -1.98215 | 2.856898 | -1.5050  | -1.8397 | 2.9355  |
| H    | -1.02352 | -3.41388 | 1.1285   | -0.9682  | -3.3599 | 1.2582  |
| H    | -0.99025 | -3.53685 | -0.63174 | -0.9656  | -3.5744 | -0.5033 |
| H    | -2.42619 | -4.05192 | 0.263745 | -2.3904  | -4.0542 | 0.4483  |
| H    | 2.686703 | 1.722561 | 2.433909 | 2.5502   | 1.8334  | 2.3485  |
| H    | 0.578286 | 0.177517 | 3.057868 | 0.4917   | 0.2126  | 3.0068  |
| H    | 1.159295 | -2.35011 | 2.360187 | 1.1858   | -2.3198 | 2.3874  |
| H    | 3.622965 | -2.37352 | 1.274289 | 3.6741   | -2.2752 | 1.3220  |
| H    | 4.565721 | 0.1501   | 1.303818 | 4.5145   | 0.2989  | 1.2809  |
| H    | 2.226973 | -2.8554  | -1.71296 | 2.4358   | -2.8951 | -1.4995 |
| H    | 4.446975 | -1.48382 | -1.05576 | 4.5236   | -1.2494 | -1.0026 |
| H    | 4.080149 | 1.084305 | -1.75987 | 3.8725   | 1.2201  | -1.8859 |
| H    | 1.629756 | 1.299594 | -2.86907 | 1.3796   | 1.0994  | -2.9406 |
| H    | 0.490084 | -1.12909 | -2.84651 | 0.4977   | -1.4359 | -2.7243 |

**Table S7.** Optimized geometry for Cp\*Ir( $\mu$ -N<sup>t</sup>Bu)( $\mu$ -H)ZrCp<sub>2</sub>OTf (**3-Zr**) in Cartesian coordinates (Å), computed using the B3LYP functional.

| Atom | x       | y       | z       |
|------|---------|---------|---------|
| Ir   | 1.9617  | 0.1618  | 0.0281  |
| Zr   | -0.8644 | -1.0166 | 0.0836  |
| H    | 1.1926  | -1.2587 | 0.2340  |
| N    | 0.2098  | 0.9115  | -0.0331 |
| O    | -2.6946 | 0.2462  | -0.1808 |
| O    | -4.4084 | 0.2426  | -1.9855 |
| O    | -4.7531 | -1.1485 | 0.0928  |
| S    | -4.1642 | 0.0297  | -0.5564 |
| C    | -4.9084 | 1.4976  | 0.3119  |
| F    | -4.6391 | 1.4409  | 1.6285  |
| F    | -4.4034 | 2.6364  | -0.1759 |
| F    | -6.2316 | 1.4985  | 0.1435  |
| C    | -0.2118 | 2.3261  | -0.1791 |
| C    | 0.9777  | 3.2961  | -0.1642 |
| C    | -0.9494 | 2.4997  | -1.5268 |
| C    | -1.1297 | 2.7012  | 1.0065  |
| C    | 3.8982  | 0.0046  | 1.1630  |
| C    | 3.9422  | -0.9671 | 0.1100  |
| C    | 3.8327  | -0.2667 | -1.1358 |
| C    | 3.8599  | 1.1662  | -0.8542 |
| C    | 3.9019  | 1.3323  | 0.5565  |
| C    | 4.0471  | -0.2649 | 2.6321  |
| C    | 4.0744  | -2.4536 | 0.2824  |
| C    | 3.8990  | -0.8723 | -2.5073 |
| C    | 4.0043  | 2.2277  | -1.9050 |
| C    | 4.1089  | 2.6065  | 1.3208  |
| C    | -2.1115 | -2.4742 | 1.8172  |
| C    | -2.2630 | -1.1520 | 2.2944  |
| C    | -0.9867 | -0.6600 | 2.6680  |
| C    | -0.0437 | -1.6983 | 2.4563  |
| C    | -0.7314 | -2.8156 | 1.9141  |
| C    | -1.1268 | -3.2934 | -1.1825 |
| C    | -2.1719 | -2.4657 | -1.6499 |
| C    | -1.5853 | -1.4051 | -2.4058 |
| C    | -0.1881 | -1.5621 | -2.3708 |
| C    | 0.1059  | -2.7215 | -1.5894 |
| H    | 1.5344  | 3.2137  | 0.7715  |
| H    | 0.6153  | 4.3258  | -0.2560 |
| H    | 1.6534  | 3.0994  | -0.9980 |
| H    | -0.2779 | 2.2483  | -2.3554 |
| H    | -1.2620 | 3.5427  | -1.6505 |
| H    | -1.8342 | 1.8686  | -1.5884 |
| H    | -1.9972 | 2.0478  | 1.0680  |
| H    | -1.4837 | 3.7320  | 0.8942  |
| H    | -0.5716 | 2.6380  | 1.9474  |
| H    | 3.6860  | -1.2617 | 2.8969  |
| H    | 3.4899  | 0.4615  | 3.2293  |
| H    | 5.1013  | -0.2051 | 2.9346  |
| H    | 5.1314  | -2.7484 | 0.2889  |
| H    | 3.5870  | -2.9994 | -0.5294 |
| H    | 3.6321  | -2.7915 | 1.2229  |
| H    | 4.9389  | -0.9401 | -2.8543 |
| H    | 3.3478  | -0.2715 | -3.2353 |
| H    | 3.4792  | -1.8808 | -2.5219 |
| H    | 3.8329  | 3.2276  | -1.5030 |
| H    | 3.3089  | 2.0748  | -2.7351 |
| H    | 5.0202  | 2.2075  | -2.3208 |
| H    | 5.1608  | 2.6931  | 1.6240  |
| H    | 3.5047  | 2.6364  | 2.2318  |
| H    | 3.8625  | 3.4870  | 0.7256  |
| H    | -2.9103 | -3.0988 | 1.4423  |
| H    | -3.1897 | -0.5994 | 2.3159  |
| H    | -0.7691 | 0.3284  | 3.0465  |



|   |         |         |         |
|---|---------|---------|---------|
| H | 1.0157  | -1.6403 | 2.6572  |
| H | -0.2869 | -3.7694 | 1.6631  |
| H | -1.2452 | -4.1928 | -0.5942 |
| H | -3.2293 | -2.6164 | -1.4830 |
| H | -2.1349 | -0.6035 | -2.8792 |
| H | 0.5402  | -0.9018 | -2.8185 |
| H | 1.0902  | -3.1248 | -1.3954 |

---

### First 50 Excited States for 2-Ti as Predicted by TDDFT Using PW91PW91

|               |           |           |           |           |          |              |
|---------------|-----------|-----------|-----------|-----------|----------|--------------|
| Excited State | 1:        | Singlet-A | 1.5373 eV | 806.52 nm | f=0.0002 | <S**2>=0.000 |
|               | 106 ->108 | -0.14151  |           |           |          |              |
|               | 107 ->108 | 0.69184   |           |           |          |              |
| Excited State | 2:        | Singlet-A | 1.6050 eV | 772.50 nm | f=0.0003 | <S**2>=0.000 |
|               | 106 ->108 | 0.69172   |           |           |          |              |
|               | 107 ->108 | 0.14184   |           |           |          |              |
| Excited State | 3:        | Singlet-A | 2.0539 eV | 603.67 nm | f=0.0007 | <S**2>=0.000 |
|               | 105 ->108 | 0.70520   |           |           |          |              |
| Excited State | 4:        | Singlet-A | 2.2691 eV | 546.40 nm | f=0.0006 | <S**2>=0.000 |
|               | 106 ->109 | -0.28864  |           |           |          |              |
|               | 107 ->109 | 0.63201   |           |           |          |              |
| Excited State | 5:        | Singlet-A | 2.3619 eV | 524.92 nm | f=0.0020 | <S**2>=0.000 |
|               | 103 ->108 | 0.17116   |           |           |          |              |
|               | 104 ->108 | 0.46737   |           |           |          |              |
|               | 106 ->109 | 0.43745   |           |           |          |              |
|               | 107 ->109 | 0.21153   |           |           |          |              |
| Excited State | 6:        | Singlet-A | 2.3914 eV | 518.45 nm | f=0.0107 | <S**2>=0.000 |
|               | 103 ->108 | 0.11809   |           |           |          |              |
|               | 104 ->108 | 0.45828   |           |           |          |              |
|               | 106 ->109 | -0.45436  |           |           |          |              |
|               | 107 ->109 | -0.19820  |           |           |          |              |
| Excited State | 7:        | Singlet-A | 2.4352 eV | 509.13 nm | f=0.0018 | <S**2>=0.000 |
|               | 103 ->108 | 0.66766   |           |           |          |              |
|               | 104 ->108 | -0.19293  |           |           |          |              |
| Excited State | 8:        | Singlet-A | 2.6835 eV | 462.02 nm | f=0.0030 | <S**2>=0.000 |
|               | 104 ->109 | -0.11175  |           |           |          |              |
|               | 105 ->109 | 0.69646   |           |           |          |              |
| Excited State | 9:        | Singlet-A | 2.8928 eV | 428.60 nm | f=0.0004 | <S**2>=0.000 |
|               | 104 ->109 | 0.68365   |           |           |          |              |
|               | 105 ->109 | 0.10696   |           |           |          |              |
| Excited State | 10:       | Singlet-A | 3.1211 eV | 397.25 nm | f=0.0036 | <S**2>=0.000 |
|               | 103 ->109 | -0.14699  |           |           |          |              |

|               |       |           |           |           |          |              |  |
|---------------|-------|-----------|-----------|-----------|----------|--------------|--|
| 106           | ->110 | -0.17887  |           |           |          |              |  |
| 106           | ->111 | 0.14343   |           |           |          |              |  |
| 107           | ->110 | 0.54712   |           |           |          |              |  |
| 107           | ->111 | 0.31603   |           |           |          |              |  |
| 107           | ->113 | 0.10073   |           |           |          |              |  |
| Excited State | 11:   | Singlet-A | 3.1346 eV | 395.54 nm | f=0.0012 | <S**2>=0.000 |  |
| 106           | ->110 | 0.30179   |           |           |          |              |  |
| 107           | ->110 | -0.21250  |           |           |          |              |  |
| 107           | ->111 | 0.57806   |           |           |          |              |  |
| 107           | ->112 | 0.12675   |           |           |          |              |  |
| Excited State | 12:   | Singlet-A | 3.1759 eV | 390.39 nm | f=0.0042 | <S**2>=0.000 |  |
| 103           | ->109 | 0.13159   |           |           |          |              |  |
| 106           | ->110 | 0.48937   |           |           |          |              |  |
| 106           | ->111 | 0.42238   |           |           |          |              |  |
| 107           | ->110 | 0.17317   |           |           |          |              |  |
| 107           | ->111 | -0.15485  |           |           |          |              |  |
| Excited State | 13:   | Singlet-A | 3.2214 eV | 384.88 nm | f=0.0066 | <S**2>=0.000 |  |
| 103           | ->109 | 0.49583   |           |           |          |              |  |
| 106           | ->110 | -0.20079  |           |           |          |              |  |
| 106           | ->112 | 0.12326   |           |           |          |              |  |
| 107           | ->112 | 0.40023   |           |           |          |              |  |
| Excited State | 14:   | Singlet-A | 3.2485 eV | 381.67 nm | f=0.0041 | <S**2>=0.000 |  |
| 101           | ->108 | 0.19464   |           |           |          |              |  |
| 102           | ->108 | 0.12309   |           |           |          |              |  |
| 103           | ->109 | -0.21270  |           |           |          |              |  |
| 106           | ->110 | 0.17074   |           |           |          |              |  |
| 106           | ->111 | -0.29042  |           |           |          |              |  |
| 106           | ->112 | -0.16868  |           |           |          |              |  |
| 107           | ->110 | 0.18502   |           |           |          |              |  |
| 107           | ->111 | -0.16578  |           |           |          |              |  |
| 107           | ->112 | 0.41592   |           |           |          |              |  |
| Excited State | 15:   | Singlet-A | 3.2644 eV | 379.81 nm | f=0.0277 | <S**2>=0.000 |  |
| 101           | ->108 | 0.11441   |           |           |          |              |  |
| 103           | ->109 | -0.27777  |           |           |          |              |  |
| 106           | ->110 | -0.22423  |           |           |          |              |  |
| 106           | ->111 | 0.39593   |           |           |          |              |  |
| 106           | ->113 | 0.16009   |           |           |          |              |  |
| 107           | ->110 | -0.17980  |           |           |          |              |  |

|                   |           |           |           |          |              |  |  |
|-------------------|-----------|-----------|-----------|----------|--------------|--|--|
| 107 ->112         | 0.25210   |           |           |          |              |  |  |
| 107 ->113         | -0.22776  |           |           |          |              |  |  |
| Excited State 16: | Singlet-A | 3.3028 eV | 375.40 nm | f=0.0073 | <S**2>=0.000 |  |  |
| 101 ->108         | -0.15738  |           |           |          |              |  |  |
| 102 ->108         | 0.50442   |           |           |          |              |  |  |
| 103 ->109         | -0.11571  |           |           |          |              |  |  |
| 106 ->112         | 0.42445   |           |           |          |              |  |  |
| Excited State 17: | Singlet-A | 3.3331 eV | 371.98 nm | f=0.0002 | <S**2>=0.000 |  |  |
| 101 ->108         | 0.10925   |           |           |          |              |  |  |
| 102 ->108         | 0.45641   |           |           |          |              |  |  |
| 103 ->109         | 0.14654   |           |           |          |              |  |  |
| 106 ->112         | -0.43166  |           |           |          |              |  |  |
| 107 ->112         | -0.19621  |           |           |          |              |  |  |
| Excited State 18: | Singlet-A | 3.4348 eV | 360.97 nm | f=0.0002 | <S**2>=0.000 |  |  |
| 101 ->108         | 0.62336   |           |           |          |              |  |  |
| 106 ->112         | 0.24183   |           |           |          |              |  |  |
| 107 ->112         | -0.17727  |           |           |          |              |  |  |
| Excited State 19: | Singlet-A | 3.4550 eV | 358.85 nm | f=0.0057 | <S**2>=0.000 |  |  |
| 100 ->108         | 0.10911   |           |           |          |              |  |  |
| 106 ->113         | 0.38659   |           |           |          |              |  |  |
| 107 ->113         | 0.53079   |           |           |          |              |  |  |
| 107 ->114         | -0.14300  |           |           |          |              |  |  |
| Excited State 20: | Singlet-A | 3.5339 eV | 350.84 nm | f=0.0089 | <S**2>=0.000 |  |  |
| 100 ->108         | 0.51568   |           |           |          |              |  |  |
| 102 ->108         | 0.10796   |           |           |          |              |  |  |
| 106 ->113         | -0.31460  |           |           |          |              |  |  |
| 106 ->114         | 0.22178   |           |           |          |              |  |  |
| 107 ->114         | -0.24185  |           |           |          |              |  |  |
| Excited State 21: | Singlet-A | 3.5666 eV | 347.63 nm | f=0.0118 | <S**2>=0.000 |  |  |
| 100 ->108         | 0.34475   |           |           |          |              |  |  |
| 105 ->110         | 0.43485   |           |           |          |              |  |  |
| 106 ->113         | 0.19815   |           |           |          |              |  |  |
| 106 ->114         | -0.10793  |           |           |          |              |  |  |
| 107 ->113         | -0.14433  |           |           |          |              |  |  |
| 107 ->114         | 0.27394   |           |           |          |              |  |  |
| 107 ->115         | 0.13346   |           |           |          |              |  |  |

Excited State 22: Singlet-A 3.5822 eV 346.11 nm f=0.0039 <S\*\*2>=0.000  
100 ->108 -0.25380  
105 ->110 0.53496  
105 ->111 -0.14537  
106 ->113 -0.19460  
106 ->114 0.14983  
107 ->114 -0.19185

Excited State 23: Singlet-A 3.6170 eV 342.78 nm f=0.0019 <S\*\*2>=0.000  
105 ->110 0.10829  
105 ->111 0.67776  
107 ->114 -0.10848

Excited State 24: Singlet-A 3.6371 eV 340.89 nm f=0.0006 <S\*\*2>=0.000  
99 ->108 0.67005  
106 ->114 0.10884

Excited State 25: Singlet-A 3.6742 eV 337.45 nm f=0.0077 <S\*\*2>=0.000  
99 ->108 -0.12753  
104 ->112 -0.10869  
106 ->114 0.49265  
106 ->115 0.10260  
107 ->113 0.10686  
107 ->114 0.40657

Excited State 26: Singlet-A 3.6932 eV 335.71 nm f=0.0007 <S\*\*2>=0.000  
105 ->112 0.69613

Excited State 27: Singlet-A 3.7290 eV 332.49 nm f=0.0027 <S\*\*2>=0.000  
104 ->110 0.22994  
104 ->111 0.10327  
106 ->114 0.11711  
107 ->114 -0.16500  
107 ->115 0.60624

Excited State 28: Singlet-A 3.7383 eV 331.66 nm f=0.0002 <S\*\*2>=0.000  
104 ->110 0.64133  
107 ->115 -0.21646

Excited State 29: Singlet-A 3.7735 eV 328.56 nm f=0.0005 <S\*\*2>=0.000  
104 ->111 0.65803  
106 ->115 -0.18392  
107 ->115 -0.12392

|               |           |           |           |           |          |              |
|---------------|-----------|-----------|-----------|-----------|----------|--------------|
| Excited State | 30:       | Singlet-A | 3.7901 eV | 327.13 nm | f=0.0049 | <S**2>=0.000 |
|               | 104 ->111 | 0.20700   |           |           |          |              |
|               | 106 ->114 | -0.18801  |           |           |          |              |
|               | 106 ->115 | 0.62250   |           |           |          |              |
| Excited State | 31:       | Singlet-A | 3.8409 eV | 322.80 nm | f=0.0002 | <S**2>=0.000 |
|               | 98 ->108  | -0.42066  |           |           |          |              |
|               | 107 ->116 | 0.55825   |           |           |          |              |
| Excited State | 32:       | Singlet-A | 3.8464 eV | 322.34 nm | f=0.0021 | <S**2>=0.000 |
|               | 98 ->108  | 0.53054   |           |           |          |              |
|               | 107 ->116 | 0.42955   |           |           |          |              |
| Excited State | 33:       | Singlet-A | 3.8636 eV | 320.90 nm | f=0.0006 | <S**2>=0.000 |
|               | 98 ->108  | 0.10819   |           |           |          |              |
|               | 102 ->109 | -0.17275  |           |           |          |              |
|               | 104 ->112 | 0.65199   |           |           |          |              |
| Excited State | 34:       | Singlet-A | 3.9070 eV | 317.34 nm | f=0.0001 | <S**2>=0.000 |
|               | 103 ->110 | -0.11012  |           |           |          |              |
|               | 105 ->113 | 0.44290   |           |           |          |              |
|               | 106 ->116 | 0.52529   |           |           |          |              |
| Excited State | 35:       | Singlet-A | 3.9107 eV | 317.04 nm | f=0.0024 | <S**2>=0.000 |
|               | 103 ->110 | -0.10720  |           |           |          |              |
|               | 105 ->113 | 0.48977   |           |           |          |              |
|               | 105 ->114 | -0.11906  |           |           |          |              |
|               | 106 ->116 | -0.46731  |           |           |          |              |
| Excited State | 36:       | Singlet-A | 3.9437 eV | 314.38 nm | f=0.0039 | <S**2>=0.000 |
|               | 102 ->109 | 0.66467   |           |           |          |              |
|               | 104 ->112 | 0.15231   |           |           |          |              |
| Excited State | 37:       | Singlet-A | 3.9778 eV | 311.69 nm | f=0.0092 | <S**2>=0.000 |
|               | 101 ->109 | 0.42841   |           |           |          |              |
|               | 103 ->110 | 0.32762   |           |           |          |              |
|               | 103 ->111 | 0.20567   |           |           |          |              |
|               | 105 ->113 | 0.10310   |           |           |          |              |
|               | 106 ->113 | 0.13609   |           |           |          |              |
|               | 106 ->114 | 0.13704   |           |           |          |              |
|               | 107 ->113 | -0.12510  |           |           |          |              |
|               | 107 ->114 | -0.12607  |           |           |          |              |

|                   |           |           |           |          |              |  |  |
|-------------------|-----------|-----------|-----------|----------|--------------|--|--|
| 107 ->117         | -0.10967  |           |           |          |              |  |  |
| Excited State 38: | Singlet-A | 3.9803 eV | 311.49 nm | f=0.0144 | <S**2>=0.000 |  |  |
| 101 ->109         | -0.26090  |           |           |          |              |  |  |
| 103 ->110         | 0.47441   |           |           |          |              |  |  |
| 103 ->111         | 0.30876   |           |           |          |              |  |  |
| 105 ->114         | -0.10734  |           |           |          |              |  |  |
| 106 ->113         | -0.10625  |           |           |          |              |  |  |
| 107 ->117         | 0.11517   |           |           |          |              |  |  |
| Excited State 39: | Singlet-A | 4.0182 eV | 308.56 nm | f=0.0036 | <S**2>=0.000 |  |  |
| 103 ->110         | -0.27443  |           |           |          |              |  |  |
| 103 ->111         | 0.52258   |           |           |          |              |  |  |
| 103 ->112         | 0.10073   |           |           |          |              |  |  |
| 104 ->113         | 0.15400   |           |           |          |              |  |  |
| 107 ->117         | -0.29351  |           |           |          |              |  |  |
| Excited State 40: | Singlet-A | 4.0375 eV | 307.08 nm | f=0.0020 | <S**2>=0.000 |  |  |
| 103 ->111         | 0.16923   |           |           |          |              |  |  |
| 103 ->112         | 0.19463   |           |           |          |              |  |  |
| 104 ->113         | 0.24219   |           |           |          |              |  |  |
| 107 ->117         | 0.58756   |           |           |          |              |  |  |
| Excited State 41: | Singlet-A | 4.0568 eV | 305.62 nm | f=0.0047 | <S**2>=0.000 |  |  |
| 104 ->113         | -0.47381  |           |           |          |              |  |  |
| 105 ->114         | 0.48609   |           |           |          |              |  |  |
| Excited State 42: | Singlet-A | 4.0856 eV | 303.47 nm | f=0.0127 | <S**2>=0.000 |  |  |
| 103 ->112         | 0.20148   |           |           |          |              |  |  |
| 104 ->113         | 0.21061   |           |           |          |              |  |  |
| 105 ->114         | 0.29798   |           |           |          |              |  |  |
| 106 ->117         | 0.49285   |           |           |          |              |  |  |
| 107 ->117         | -0.12939  |           |           |          |              |  |  |
| Excited State 43: | Singlet-A | 4.1075 eV | 301.85 nm | f=0.0005 | <S**2>=0.000 |  |  |
| 99 ->109          | -0.14363  |           |           |          |              |  |  |
| 103 ->112         | 0.43721   |           |           |          |              |  |  |
| 104 ->113         | -0.32017  |           |           |          |              |  |  |
| 105 ->113         | -0.10449  |           |           |          |              |  |  |
| 105 ->114         | -0.32019  |           |           |          |              |  |  |
| 106 ->117         | 0.18815   |           |           |          |              |  |  |
| Excited State 44: | Singlet-A | 4.1179 eV | 301.09 nm | f=0.0225 | <S**2>=0.000 |  |  |

|                   |           |           |           |          |              |  |  |
|-------------------|-----------|-----------|-----------|----------|--------------|--|--|
| 99 ->109          | 0.22404   |           |           |          |              |  |  |
| 100 ->109         | 0.41467   |           |           |          |              |  |  |
| 103 ->111         | 0.10165   |           |           |          |              |  |  |
| 103 ->112         | -0.25808  |           |           |          |              |  |  |
| 106 ->117         | 0.35225   |           |           |          |              |  |  |
| Excited State 45: | Singlet-A | 4.1351 eV | 299.84 nm | f=0.0222 | <S**2>=0.000 |  |  |
| 99 ->109          | -0.16166  |           |           |          |              |  |  |
| 100 ->109         | 0.53556   |           |           |          |              |  |  |
| 103 ->110         | 0.10294   |           |           |          |              |  |  |
| 103 ->112         | 0.17949   |           |           |          |              |  |  |
| 106 ->117         | -0.27394  |           |           |          |              |  |  |
| Excited State 46: | Singlet-A | 4.2030 eV | 294.99 nm | f=0.0137 | <S**2>=0.000 |  |  |
| 105 ->115         | 0.67510   |           |           |          |              |  |  |
| Excited State 47: | Singlet-A | 4.2142 eV | 294.20 nm | f=0.0621 | <S**2>=0.000 |  |  |
| 99 ->109          | 0.22158   |           |           |          |              |  |  |
| 101 ->109         | 0.22873   |           |           |          |              |  |  |
| 104 ->114         | 0.56424   |           |           |          |              |  |  |
| 105 ->115         | -0.13497  |           |           |          |              |  |  |
| Excited State 48: | Singlet-A | 4.3125 eV | 287.50 nm | f=0.0483 | <S**2>=0.000 |  |  |
| 99 ->109          | 0.20603   |           |           |          |              |  |  |
| 103 ->113         | 0.52348   |           |           |          |              |  |  |
| 104 ->114         | -0.21062  |           |           |          |              |  |  |
| 106 ->118         | 0.10520   |           |           |          |              |  |  |
| 107 ->119         | 0.14897   |           |           |          |              |  |  |
| Excited State 49: | Singlet-A | 4.3280 eV | 286.47 nm | f=0.0673 | <S**2>=0.000 |  |  |
| 99 ->109          | -0.19136  |           |           |          |              |  |  |
| 103 ->113         | 0.40011   |           |           |          |              |  |  |
| 104 ->114         | 0.21784   |           |           |          |              |  |  |
| 105 ->116         | 0.17521   |           |           |          |              |  |  |
| 107 ->118         | 0.32187   |           |           |          |              |  |  |
| 107 ->119         | -0.15806  |           |           |          |              |  |  |
| Excited State 50: | Singlet-A | 4.3353 eV | 285.99 nm | f=0.0029 | <S**2>=0.000 |  |  |
| 99 ->109          | 0.10718   |           |           |          |              |  |  |
| 105 ->116         | 0.67890   |           |           |          |              |  |  |
| 107 ->118         | -0.10301  |           |           |          |              |  |  |



### First 50 Excited States for 2-Ti as Predicted by TDDFT Using B3LYP

|               |           |           |           |           |          |              |
|---------------|-----------|-----------|-----------|-----------|----------|--------------|
| Excited State | 1:        | Singlet-A | 1.6084 eV | 770.86 nm | f=0.0013 | <S**2>=0.000 |
|               | 100 ->108 | 0.12298   |           |           |          |              |
|               | 106 ->108 | -0.23154  |           |           |          |              |
|               | 107 ->108 | 0.63955   |           |           |          |              |
| Excited State | 2:        | Singlet-A | 2.1848 eV | 567.50 nm | f=0.0001 | <S**2>=0.000 |
|               | 106 ->108 | 0.65013   |           |           |          |              |
|               | 107 ->108 | 0.24778   |           |           |          |              |
|               | 107 ->109 | -0.10102  |           |           |          |              |
| Excited State | 3:        | Singlet-A | 2.3783 eV | 521.31 nm | f=0.0003 | <S**2>=0.000 |
|               | 106 ->108 | 0.12071   |           |           |          |              |
|               | 106 ->109 | -0.10839  |           |           |          |              |
|               | 107 ->109 | 0.67280   |           |           |          |              |
| Excited State | 4:        | Singlet-A | 2.5023 eV | 495.48 nm | f=0.0045 | <S**2>=0.000 |
|               | 103 ->109 | 0.26679   |           |           |          |              |
|               | 106 ->109 | 0.63247   |           |           |          |              |
| Excited State | 5:        | Singlet-A | 2.6536 eV | 467.23 nm | f=0.0027 | <S**2>=0.000 |
|               | 104 ->109 | -0.22785  |           |           |          |              |
|               | 105 ->108 | -0.19044  |           |           |          |              |
|               | 105 ->109 | 0.61149   |           |           |          |              |
|               | 105 ->113 | 0.10733   |           |           |          |              |
| Excited State | 6:        | Singlet-A | 2.8174 eV | 440.07 nm | f=0.0007 | <S**2>=0.000 |
|               | 104 ->108 | -0.39068  |           |           |          |              |
|               | 104 ->109 | 0.50207   |           |           |          |              |
|               | 105 ->108 | -0.14027  |           |           |          |              |
|               | 105 ->109 | 0.19049   |           |           |          |              |
| Excited State | 7:        | Singlet-A | 2.8455 eV | 435.72 nm | f=0.0006 | <S**2>=0.000 |
|               | 104 ->108 | -0.20717  |           |           |          |              |
|               | 105 ->108 | 0.63361   |           |           |          |              |
|               | 105 ->109 | 0.19685   |           |           |          |              |
| Excited State | 8:        | Singlet-A | 2.9071 eV | 426.49 nm | f=0.0022 | <S**2>=0.000 |
|               | 104 ->108 | 0.50555   |           |           |          |              |
|               | 104 ->109 | 0.39535   |           |           |          |              |
|               | 105 ->108 | 0.15936   |           |           |          |              |
|               | 105 ->109 | 0.13145   |           |           |          |              |

|               |           |           |           |           |          |              |
|---------------|-----------|-----------|-----------|-----------|----------|--------------|
| Excited State | 9:        | Singlet-A | 3.0347 eV | 408.56 nm | f=0.0003 | <S**2>=0.000 |
|               | 103 ->108 | 0.12436   |           |           |          |              |
|               | 106 ->112 | -0.22029  |           |           |          |              |
|               | 107 ->112 | 0.59144   |           |           |          |              |
|               | 107 ->113 | 0.14493   |           |           |          |              |
|               | 107 ->114 | -0.10261  |           |           |          |              |
| Excited State | 10:       | Singlet-A | 3.1220 eV | 397.13 nm | f=0.0005 | <S**2>=0.000 |
|               | 103 ->108 | 0.67977   |           |           |          |              |
|               | 107 ->112 | -0.11635  |           |           |          |              |
| Excited State | 11:       | Singlet-A | 3.2880 eV | 377.08 nm | f=0.0002 | <S**2>=0.000 |
|               | 106 ->113 | -0.17501  |           |           |          |              |
|               | 107 ->112 | -0.15160  |           |           |          |              |
|               | 107 ->113 | 0.61198   |           |           |          |              |
| Excited State | 12:       | Singlet-A | 3.3668 eV | 368.25 nm | f=0.0066 | <S**2>=0.000 |
|               | 103 ->109 | 0.51164   |           |           |          |              |
|               | 106 ->109 | -0.21307  |           |           |          |              |
|               | 106 ->113 | 0.30166   |           |           |          |              |
|               | 107 ->110 | 0.16001   |           |           |          |              |
|               | 107 ->114 | 0.12862   |           |           |          |              |
| Excited State | 13:       | Singlet-A | 3.5166 eV | 352.57 nm | f=0.0075 | <S**2>=0.000 |
|               | 106 ->110 | -0.14860  |           |           |          |              |
|               | 106 ->112 | -0.14466  |           |           |          |              |
|               | 106 ->113 | -0.15742  |           |           |          |              |
|               | 106 ->115 | 0.13769   |           |           |          |              |
|               | 107 ->110 | 0.40370   |           |           |          |              |
|               | 107 ->114 | 0.10067   |           |           |          |              |
|               | 107 ->115 | -0.36135  |           |           |          |              |
|               | 107 ->116 | 0.20406   |           |           |          |              |
| Excited State | 14:       | Singlet-A | 3.5729 eV | 347.02 nm | f=0.0082 | <S**2>=0.000 |
|               | 106 ->110 | 0.43617   |           |           |          |              |
|               | 106 ->111 | -0.31990  |           |           |          |              |
|               | 106 ->114 | 0.32727   |           |           |          |              |
|               | 107 ->110 | 0.20467   |           |           |          |              |
|               | 107 ->111 | -0.11982  |           |           |          |              |
| Excited State | 15:       | Singlet-A | 3.6814 eV | 336.79 nm | f=0.0026 | <S**2>=0.000 |
|               | 106 ->111 | -0.11049  |           |           |          |              |
|               | 106 ->112 | 0.52723   |           |           |          |              |

|           |          |
|-----------|----------|
| 107 ->111 | 0.22534  |
| 107 ->112 | 0.20741  |
| 107 ->114 | -0.14793 |
| 107 ->115 | -0.19548 |
| 107 ->116 | 0.12229  |

Excited State 16: Singlet-A 3.7972 eV 326.51 nm f=0.0029 <S\*\*2>=0.000

|           |          |
|-----------|----------|
| 99 ->108  | -0.10569 |
| 102 ->108 | -0.10555 |
| 106 ->110 | 0.13369  |
| 106 ->111 | 0.23685  |
| 106 ->114 | -0.12772 |
| 106 ->115 | -0.15828 |
| 106 ->116 | 0.10062  |
| 107 ->110 | 0.45284  |
| 107 ->114 | -0.26134 |
| 107 ->115 | 0.20875  |

Excited State 17: Singlet-A 3.8220 eV 324.40 nm f=0.0086 <S\*\*2>=0.000

|           |          |
|-----------|----------|
| 99 ->108  | -0.17984 |
| 100 ->108 | -0.15890 |
| 102 ->108 | -0.25432 |
| 106 ->110 | 0.41380  |
| 106 ->111 | 0.18910  |
| 106 ->112 | -0.12043 |
| 106 ->114 | -0.15077 |
| 107 ->110 | -0.19577 |
| 107 ->111 | 0.11724  |
| 107 ->114 | 0.11062  |
| 107 ->115 | -0.19762 |
| 107 ->116 | 0.10048  |

Excited State 18: Singlet-A 3.8473 eV 322.27 nm f=0.0102 <S\*\*2>=0.000

|           |          |
|-----------|----------|
| 100 ->108 | -0.11388 |
| 102 ->108 | -0.10109 |
| 103 ->109 | -0.27319 |
| 106 ->110 | -0.11809 |
| 106 ->112 | -0.11822 |
| 106 ->113 | 0.51769  |
| 107 ->113 | 0.21612  |

Excited State 19: Singlet-A 3.8549 eV 321.63 nm f=0.0024 <S\*\*2>=0.000

|          |         |
|----------|---------|
| 99 ->108 | 0.30843 |
|----------|---------|

|                   |           |           |           |          |              |  |  |
|-------------------|-----------|-----------|-----------|----------|--------------|--|--|
| 100 ->108         | 0.10497   |           |           |          |              |  |  |
| 102 ->108         | 0.46134   |           |           |          |              |  |  |
| 106 ->110         | 0.24344   |           |           |          |              |  |  |
| 106 ->111         | 0.15765   |           |           |          |              |  |  |
| 106 ->113         | 0.16705   |           |           |          |              |  |  |
| 106 ->114         | -0.14835  |           |           |          |              |  |  |
| 107 ->111         | 0.11453   |           |           |          |              |  |  |
| Excited State 20: | Singlet-A | 3.9769 eV | 311.76 nm | f=0.0075 | <S**2>=0.000 |  |  |
| 100 ->108         | 0.40043   |           |           |          |              |  |  |
| 101 ->108         | 0.38561   |           |           |          |              |  |  |
| 102 ->108         | -0.14062  |           |           |          |              |  |  |
| 104 ->110         | 0.16704   |           |           |          |              |  |  |
| 104 ->111         | -0.20788  |           |           |          |              |  |  |
| 104 ->114         | 0.23212   |           |           |          |              |  |  |
| Excited State 21: | Singlet-A | 4.0036 eV | 309.68 nm | f=0.0012 | <S**2>=0.000 |  |  |
| 99 ->108          | 0.45223   |           |           |          |              |  |  |
| 100 ->108         | 0.20952   |           |           |          |              |  |  |
| 101 ->108         | -0.17226  |           |           |          |              |  |  |
| 102 ->108         | -0.37208  |           |           |          |              |  |  |
| 104 ->110         | -0.10401  |           |           |          |              |  |  |
| 104 ->111         | 0.12337   |           |           |          |              |  |  |
| 104 ->114         | -0.12207  |           |           |          |              |  |  |
| Excited State 22: | Singlet-A | 4.0236 eV | 308.14 nm | f=0.0174 | <S**2>=0.000 |  |  |
| 99 ->108          | -0.34703  |           |           |          |              |  |  |
| 100 ->108         | 0.42728   |           |           |          |              |  |  |
| 101 ->108         | -0.18313  |           |           |          |              |  |  |
| 104 ->110         | -0.14813  |           |           |          |              |  |  |
| 104 ->111         | 0.15251   |           |           |          |              |  |  |
| 104 ->114         | -0.18486  |           |           |          |              |  |  |
| 107 ->108         | -0.10367  |           |           |          |              |  |  |
| 107 ->111         | 0.10629   |           |           |          |              |  |  |
| Excited State 23: | Singlet-A | 4.0352 eV | 307.26 nm | f=0.0071 | <S**2>=0.000 |  |  |
| 101 ->108         | 0.51213   |           |           |          |              |  |  |
| 104 ->110         | -0.22645  |           |           |          |              |  |  |
| 104 ->111         | 0.24842   |           |           |          |              |  |  |
| 104 ->114         | -0.27334  |           |           |          |              |  |  |
| Excited State 24: | Singlet-A | 4.0826 eV | 303.69 nm | f=0.0437 | <S**2>=0.000 |  |  |
| 100 ->108         | 0.12461   |           |           |          |              |  |  |

|                   |           |           |           |          |              |  |
|-------------------|-----------|-----------|-----------|----------|--------------|--|
| 105 ->110         | 0.37487   |           |           |          |              |  |
| 105 ->111         | -0.30914  |           |           |          |              |  |
| 105 ->114         | 0.28512   |           |           |          |              |  |
| 106 ->112         | 0.11765   |           |           |          |              |  |
| 107 ->111         | -0.27445  |           |           |          |              |  |
| Excited State 25: | Singlet-A | 4.1260 eV | 300.50 nm | f=0.0118 | <S**2>=0.000 |  |
| 105 ->110         | 0.19116   |           |           |          |              |  |
| 105 ->111         | -0.13731  |           |           |          |              |  |
| 105 ->114         | 0.10749   |           |           |          |              |  |
| 106 ->114         | 0.19980   |           |           |          |              |  |
| 106 ->115         | -0.18178  |           |           |          |              |  |
| 107 ->111         | 0.45112   |           |           |          |              |  |
| 107 ->114         | 0.26462   |           |           |          |              |  |
| 107 ->115         | 0.11247   |           |           |          |              |  |
| Excited State 26: | Singlet-A | 4.1466 eV | 299.00 nm | f=0.0189 | <S**2>=0.000 |  |
| 106 ->111         | 0.33461   |           |           |          |              |  |
| 106 ->112         | 0.14320   |           |           |          |              |  |
| 106 ->114         | 0.33701   |           |           |          |              |  |
| 106 ->115         | -0.28330  |           |           |          |              |  |
| 106 ->116         | 0.13886   |           |           |          |              |  |
| 107 ->111         | -0.19825  |           |           |          |              |  |
| 107 ->115         | -0.20348  |           |           |          |              |  |
| Excited State 27: | Singlet-A | 4.2198 eV | 293.81 nm | f=0.0035 | <S**2>=0.000 |  |
| 99 ->109          | 0.10364   |           |           |          |              |  |
| 100 ->109         | -0.28221  |           |           |          |              |  |
| 101 ->109         | 0.32052   |           |           |          |              |  |
| 104 ->112         | 0.16169   |           |           |          |              |  |
| 104 ->113         | 0.21412   |           |           |          |              |  |
| 105 ->112         | 0.32968   |           |           |          |              |  |
| 105 ->113         | 0.20079   |           |           |          |              |  |
| 106 ->111         | -0.12458  |           |           |          |              |  |
| 106 ->115         | -0.10584  |           |           |          |              |  |
| Excited State 28: | Singlet-A | 4.2614 eV | 290.94 nm | f=0.0004 | <S**2>=0.000 |  |
| 98 ->108          | 0.10179   |           |           |          |              |  |
| 104 ->112         | 0.57938   |           |           |          |              |  |
| 104 ->113         | 0.11625   |           |           |          |              |  |
| 104 ->114         | -0.13523  |           |           |          |              |  |
| 105 ->112         | -0.10597  |           |           |          |              |  |
| 106 ->111         | 0.15049   |           |           |          |              |  |

|               |       |           |           |           |          |              |  |  |
|---------------|-------|-----------|-----------|-----------|----------|--------------|--|--|
| 106           | ->114 | 0.17086   |           |           |          |              |  |  |
| 106           | ->115 | 0.12787   |           |           |          |              |  |  |
| Excited State | 29:   | Singlet-A | 4.2663 eV | 290.61 nm | f=0.0191 | <S**2>=0.000 |  |  |
| 98            | ->108 | 0.47636   |           |           |          |              |  |  |
| 101           | ->109 | -0.13001  |           |           |          |              |  |  |
| 104           | ->113 | -0.10991  |           |           |          |              |  |  |
| 106           | ->111 | -0.19640  |           |           |          |              |  |  |
| 106           | ->115 | -0.24529  |           |           |          |              |  |  |
| 106           | ->116 | 0.14312   |           |           |          |              |  |  |
| 107           | ->114 | -0.17997  |           |           |          |              |  |  |
| 107           | ->115 | -0.11970  |           |           |          |              |  |  |
| Excited State | 30:   | Singlet-A | 4.2864 eV | 289.25 nm | f=0.0008 | <S**2>=0.000 |  |  |
| 98            | ->108 | 0.36645   |           |           |          |              |  |  |
| 101           | ->109 | 0.11653   |           |           |          |              |  |  |
| 104           | ->112 | -0.28405  |           |           |          |              |  |  |
| 104           | ->113 | 0.38666   |           |           |          |              |  |  |
| 106           | ->111 | 0.12411   |           |           |          |              |  |  |
| 106           | ->114 | 0.13658   |           |           |          |              |  |  |
| 106           | ->115 | 0.17291   |           |           |          |              |  |  |
| Excited State | 31:   | Singlet-A | 4.2935 eV | 288.78 nm | f=0.0095 | <S**2>=0.000 |  |  |
| 98            | ->108 | 0.18765   |           |           |          |              |  |  |
| 104           | ->113 | -0.28393  |           |           |          |              |  |  |
| 105           | ->112 | 0.43770   |           |           |          |              |  |  |
| 106           | ->111 | 0.15955   |           |           |          |              |  |  |
| 106           | ->114 | 0.11261   |           |           |          |              |  |  |
| 106           | ->115 | 0.25946   |           |           |          |              |  |  |
| 106           | ->116 | -0.14065  |           |           |          |              |  |  |
| Excited State | 32:   | Singlet-A | 4.3233 eV | 286.78 nm | f=0.0011 | <S**2>=0.000 |  |  |
| 100           | ->109 | 0.19634   |           |           |          |              |  |  |
| 101           | ->109 | -0.27310  |           |           |          |              |  |  |
| 104           | ->113 | 0.22673   |           |           |          |              |  |  |
| 105           | ->113 | 0.53854   |           |           |          |              |  |  |
| Excited State | 33:   | Singlet-A | 4.3313 eV | 286.25 nm | f=0.0013 | <S**2>=0.000 |  |  |
| 98            | ->108 | -0.11524  |           |           |          |              |  |  |
| 100           | ->109 | 0.20505   |           |           |          |              |  |  |
| 101           | ->109 | -0.22723  |           |           |          |              |  |  |
| 104           | ->113 | 0.28514   |           |           |          |              |  |  |
| 105           | ->112 | 0.36821   |           |           |          |              |  |  |

|                   |           |           |           |          |              |  |  |
|-------------------|-----------|-----------|-----------|----------|--------------|--|--|
| 105 ->113         | -0.32257  |           |           |          |              |  |  |
| 106 ->115         | -0.11358  |           |           |          |              |  |  |
| Excited State 34: | Singlet-A | 4.3674 eV | 283.88 nm | f=0.0966 | <S**2>=0.000 |  |  |
| 98 ->108          | -0.20825  |           |           |          |              |  |  |
| 102 ->109         | 0.39958   |           |           |          |              |  |  |
| 103 ->112         | 0.10129   |           |           |          |              |  |  |
| 105 ->114         | 0.15359   |           |           |          |              |  |  |
| 106 ->112         | -0.10810  |           |           |          |              |  |  |
| 106 ->114         | 0.20000   |           |           |          |              |  |  |
| 107 ->114         | -0.31665  |           |           |          |              |  |  |
| Excited State 35: | Singlet-A | 4.4089 eV | 281.21 nm | f=0.0170 | <S**2>=0.000 |  |  |
| 105 ->110         | 0.52122   |           |           |          |              |  |  |
| 105 ->111         | 0.25786   |           |           |          |              |  |  |
| 105 ->114         | -0.29298  |           |           |          |              |  |  |
| 107 ->114         | -0.12569  |           |           |          |              |  |  |
| Excited State 36: | Singlet-A | 4.4366 eV | 279.46 nm | f=0.0022 | <S**2>=0.000 |  |  |
| 103 ->110         | 0.44383   |           |           |          |              |  |  |
| 103 ->111         | -0.34763  |           |           |          |              |  |  |
| 103 ->112         | 0.10101   |           |           |          |              |  |  |
| 103 ->114         | 0.32213   |           |           |          |              |  |  |
| 104 ->113         | 0.14596   |           |           |          |              |  |  |
| Excited State 37: | Singlet-A | 4.4688 eV | 277.45 nm | f=0.0032 | <S**2>=0.000 |  |  |
| 102 ->109         | -0.10476  |           |           |          |              |  |  |
| 104 ->110         | 0.53189   |           |           |          |              |  |  |
| 104 ->111         | 0.21161   |           |           |          |              |  |  |
| 104 ->114         | -0.23706  |           |           |          |              |  |  |
| 104 ->115         | -0.10223  |           |           |          |              |  |  |
| 107 ->115         | -0.13292  |           |           |          |              |  |  |
| 107 ->116         | -0.21676  |           |           |          |              |  |  |
| Excited State 38: | Singlet-A | 4.5070 eV | 275.09 nm | f=0.0002 | <S**2>=0.000 |  |  |
| 104 ->110         | 0.21200   |           |           |          |              |  |  |
| 107 ->115         | 0.29509   |           |           |          |              |  |  |
| 107 ->116         | 0.57228   |           |           |          |              |  |  |
| Excited State 39: | Singlet-A | 4.5493 eV | 272.53 nm | f=0.0660 | <S**2>=0.000 |  |  |
| 102 ->109         | -0.30457  |           |           |          |              |  |  |
| 103 ->112         | 0.55442   |           |           |          |              |  |  |
| 103 ->114         | -0.15246  |           |           |          |              |  |  |

|                   |           |           |           |          |              |
|-------------------|-----------|-----------|-----------|----------|--------------|
| Excited State 40: | Singlet-A | 4.5739 eV | 271.07 nm | f=0.0005 | <S**2>=0.000 |
| 106 ->115         | 0.32370   |           |           |          |              |
| 106 ->116         | 0.60718   |           |           |          |              |
| Excited State 41: | Singlet-A | 4.6536 eV | 266.42 nm | f=0.1929 | <S**2>=0.000 |
| 102 ->109         | 0.31599   |           |           |          |              |
| 103 ->109         | -0.13367  |           |           |          |              |
| 103 ->112         | 0.17673   |           |           |          |              |
| 103 ->113         | 0.36296   |           |           |          |              |
| 105 ->111         | 0.20628   |           |           |          |              |
| 105 ->115         | -0.11318  |           |           |          |              |
| 107 ->114         | 0.15720   |           |           |          |              |
| 107 ->117         | 0.18613   |           |           |          |              |
| Excited State 42: | Singlet-A | 4.6673 eV | 265.65 nm | f=0.0097 | <S**2>=0.000 |
| 105 ->111         | -0.10411  |           |           |          |              |
| 107 ->117         | 0.65570   |           |           |          |              |
| Excited State 43: | Singlet-A | 4.7003 eV | 263.78 nm | f=0.0455 | <S**2>=0.000 |
| 102 ->109         | -0.13365  |           |           |          |              |
| 103 ->113         | -0.22710  |           |           |          |              |
| 105 ->111         | 0.31117   |           |           |          |              |
| 105 ->114         | 0.36263   |           |           |          |              |
| 105 ->115         | -0.31665  |           |           |          |              |
| 105 ->116         | 0.16755   |           |           |          |              |
| 106 ->117         | -0.15272  |           |           |          |              |
| Excited State 44: | Singlet-A | 4.7284 eV | 262.21 nm | f=0.0131 | <S**2>=0.000 |
| 100 ->109         | 0.24487   |           |           |          |              |
| 101 ->109         | 0.23260   |           |           |          |              |
| 103 ->110         | 0.39429   |           |           |          |              |
| 103 ->111         | 0.26068   |           |           |          |              |
| 103 ->113         | -0.15935  |           |           |          |              |
| 103 ->114         | -0.21070  |           |           |          |              |
| 103 ->115         | -0.12044  |           |           |          |              |
| 104 ->115         | -0.11808  |           |           |          |              |
| Excited State 45: | Singlet-A | 4.7317 eV | 262.03 nm | f=0.0337 | <S**2>=0.000 |
| 100 ->109         | 0.14514   |           |           |          |              |
| 101 ->109         | 0.15033   |           |           |          |              |
| 102 ->109         | -0.11790  |           |           |          |              |
| 103 ->112         | -0.13521  |           |           |          |              |



|           |          |
|-----------|----------|
| 103 ->113 | 0.22514  |
| 104 ->111 | -0.21960 |
| 104 ->114 | -0.21149 |
| 104 ->115 | 0.29793  |
| 104 ->116 | -0.16144 |
| 106 ->117 | 0.25672  |

Excited State 46: Singlet-A 4.7668 eV 260.10 nm f=0.0221 <S\*\*2>=0.000

|           |          |
|-----------|----------|
| 99 ->109  | 0.12131  |
| 100 ->109 | 0.32282  |
| 101 ->109 | 0.21732  |
| 103 ->110 | -0.24941 |
| 103 ->111 | -0.15587 |
| 103 ->112 | 0.10200  |
| 103 ->113 | -0.31929 |
| 103 ->114 | 0.19455  |
| 106 ->117 | 0.22624  |

Excited State 47: Singlet-A 4.7784 eV 259.47 nm f=0.0912 <S\*\*2>=0.000

|           |          |
|-----------|----------|
| 99 ->109  | -0.19318 |
| 100 ->109 | 0.22187  |
| 101 ->109 | 0.24755  |
| 102 ->109 | -0.12287 |
| 103 ->110 | -0.16081 |
| 103 ->112 | -0.16385 |
| 103 ->113 | 0.25366  |
| 103 ->114 | 0.10117  |
| 104 ->111 | 0.11483  |
| 104 ->114 | 0.16613  |
| 104 ->115 | -0.15838 |
| 106 ->117 | -0.20584 |
| 107 ->114 | -0.11010 |

Excited State 48: Singlet-A 4.7804 eV 259.36 nm f=0.0742 <S\*\*2>=0.000

|           |          |
|-----------|----------|
| 100 ->109 | -0.11254 |
| 102 ->109 | -0.10314 |
| 104 ->111 | 0.18341  |
| 104 ->114 | 0.20454  |
| 104 ->115 | -0.18543 |
| 104 ->116 | 0.10397  |
| 106 ->117 | 0.52767  |
| 107 ->114 | -0.10147 |

|                   |           |           |           |          |              |
|-------------------|-----------|-----------|-----------|----------|--------------|
| Excited State 49: | Singlet-A | 4.8718 eV | 254.49 nm | f=0.0075 | <S**2>=0.000 |
| 99 ->109          | 0.43233   |           |           |          |              |
| 105 ->111         | -0.23795  |           |           |          |              |
| 105 ->114         | -0.14505  |           |           |          |              |
| 105 ->115         | -0.35296  |           |           |          |              |
| 105 ->116         | 0.19050   |           |           |          |              |

|                   |           |           |           |          |              |
|-------------------|-----------|-----------|-----------|----------|--------------|
| Excited State 50: | Singlet-A | 4.9028 eV | 252.88 nm | f=0.0112 | <S**2>=0.000 |
| 98 ->109          | 0.11993   |           |           |          |              |
| 99 ->109          | 0.37548   |           |           |          |              |
| 102 ->112         | 0.11299   |           |           |          |              |
| 103 ->112         | -0.12137  |           |           |          |              |
| 105 ->111         | 0.22907   |           |           |          |              |
| 105 ->114         | 0.19138   |           |           |          |              |
| 105 ->115         | 0.31891   |           |           |          |              |
| 105 ->116         | -0.16944  |           |           |          |              |
| 106 ->117         | -0.10594  |           |           |          |              |

### First 20 Excited States for 2-Zr as Predicted by TDDFT Using PW91PW91

|               |     |           |           |           |          |              |
|---------------|-----|-----------|-----------|-----------|----------|--------------|
| Excited State | 1:  | Singlet-A | 1.8029 eV | 687.71 nm | f=0.0001 | <S**2>=0.000 |
| 107 ->108     |     | 0.70615   |           |           |          |              |
| Excited State | 2:  | Singlet-A | 1.9644 eV | 631.16 nm | f=0.0001 | <S**2>=0.000 |
| 106 ->108     |     | 0.70256   |           |           |          |              |
| Excited State | 3:  | Singlet-A | 2.2538 eV | 550.11 nm | f=0.0025 | <S**2>=0.000 |
| 104 ->108     |     | -0.10781  |           |           |          |              |
| 105 ->108     |     | 0.69737   |           |           |          |              |
| Excited State | 4:  | Singlet-A | 2.3286 eV | 532.44 nm | f=0.0011 | <S**2>=0.000 |
| 107 ->109     |     | 0.69612   |           |           |          |              |
| Excited State | 5:  | Singlet-A | 2.5212 eV | 491.76 nm | f=0.0054 | <S**2>=0.000 |
| 104 ->108     |     | -0.11420  |           |           |          |              |
| 106 ->109     |     | 0.68668   |           |           |          |              |
| Excited State | 6:  | Singlet-A | 2.6771 eV | 463.13 nm | f=0.0089 | <S**2>=0.000 |
| 104 ->108     |     | 0.64380   |           |           |          |              |
| 105 ->109     |     | 0.15389   |           |           |          |              |
| 106 ->109     |     | 0.11820   |           |           |          |              |
| 107 ->111     |     | 0.11493   |           |           |          |              |
| Excited State | 7:  | Singlet-A | 2.6964 eV | 459.82 nm | f=0.0037 | <S**2>=0.000 |
| 103 ->108     |     | 0.13411   |           |           |          |              |
| 104 ->108     |     | -0.13650  |           |           |          |              |
| 104 ->109     |     | -0.13469  |           |           |          |              |
| 105 ->109     |     | 0.65938   |           |           |          |              |
| Excited State | 8:  | Singlet-A | 2.7083 eV | 457.80 nm | f=0.0000 | <S**2>=0.000 |
| 103 ->108     |     | 0.68943   |           |           |          |              |
| 105 ->109     |     | -0.12431  |           |           |          |              |
| Excited State | 9:  | Singlet-A | 2.9301 eV | 423.14 nm | f=0.0003 | <S**2>=0.000 |
| 104 ->109     |     | 0.68648   |           |           |          |              |
| 105 ->109     |     | 0.13589   |           |           |          |              |
| Excited State | 10: | Singlet-A | 3.1867 eV | 389.07 nm | f=0.0028 | <S**2>=0.000 |
| 107 ->110     |     | 0.68879   |           |           |          |              |
| 107 ->111     |     | -0.12987  |           |           |          |              |

|               |           |           |           |           |          |              |
|---------------|-----------|-----------|-----------|-----------|----------|--------------|
| Excited State | 11:       | Singlet-A | 3.3291 eV | 372.43 nm | f=0.0007 | <S**2>=0.000 |
|               | 106 ->110 | 0.70432   |           |           |          |              |
| Excited State | 12:       | Singlet-A | 3.3620 eV | 368.78 nm | f=0.0220 | <S**2>=0.000 |
|               | 101 ->109 | 0.10838   |           |           |          |              |
|               | 102 ->108 | -0.41093  |           |           |          |              |
|               | 103 ->109 | 0.48441   |           |           |          |              |
|               | 107 ->111 | 0.26446   |           |           |          |              |
| Excited State | 13:       | Singlet-A | 3.3969 eV | 364.99 nm | f=0.0007 | <S**2>=0.000 |
|               | 102 ->108 | 0.56555   |           |           |          |              |
|               | 103 ->109 | 0.36973   |           |           |          |              |
|               | 107 ->111 | 0.15243   |           |           |          |              |
| Excited State | 14:       | Singlet-A | 3.5553 eV | 348.73 nm | f=0.0433 | <S**2>=0.000 |
|               | 103 ->109 | -0.19545  |           |           |          |              |
|               | 106 ->111 | 0.15004   |           |           |          |              |
|               | 107 ->111 | 0.47040   |           |           |          |              |
|               | 107 ->112 | -0.37427  |           |           |          |              |
|               | 107 ->113 | 0.17595   |           |           |          |              |
| Excited State | 15:       | Singlet-A | 3.5916 eV | 345.20 nm | f=0.0015 | <S**2>=0.000 |
|               | 101 ->108 | -0.12859  |           |           |          |              |
|               | 106 ->111 | 0.66250   |           |           |          |              |
| Excited State | 16:       | Singlet-A | 3.6093 eV | 343.51 nm | f=0.0014 | <S**2>=0.000 |
|               | 105 ->110 | 0.69785   |           |           |          |              |
| Excited State | 17:       | Singlet-A | 3.6430 eV | 340.34 nm | f=0.0017 | <S**2>=0.000 |
|               | 101 ->108 | 0.68033   |           |           |          |              |
|               | 106 ->111 | 0.11103   |           |           |          |              |
| Excited State | 18:       | Singlet-A | 3.6969 eV | 335.38 nm | f=0.0054 | <S**2>=0.000 |
|               | 107 ->111 | 0.12852   |           |           |          |              |
|               | 107 ->112 | 0.46579   |           |           |          |              |
|               | 107 ->113 | 0.49221   |           |           |          |              |
| Excited State | 19:       | Singlet-A | 3.7578 eV | 329.94 nm | f=0.0045 | <S**2>=0.000 |
|               | 102 ->109 | 0.65793   |           |           |          |              |
|               | 107 ->113 | 0.11774   |           |           |          |              |
|               | 107 ->114 | -0.14731  |           |           |          |              |
| Excited State | 20:       | Singlet-A | 3.7850 eV | 327.57 nm | f=0.0102 | <S**2>=0.000 |

|           |          |
|-----------|----------|
| 100 ->108 | 0.57681  |
| 102 ->109 | -0.14242 |
| 107 ->112 | -0.13222 |
| 107 ->113 | 0.26386  |

### First 20 Excited States for 2-Zr as Predicted by TDDFT Using B3LYP

|               |           |           |           |           |          |              |
|---------------|-----------|-----------|-----------|-----------|----------|--------------|
| Excited State | 1:        | Singlet-A | 2.0331 eV | 609.83 nm | f=0.0012 | <S**2>=0.000 |
|               | 107 ->108 | 0.69299   |           |           |          |              |
| Excited State | 2:        | Singlet-A | 2.3438 eV | 528.98 nm | f=0.0002 | <S**2>=0.000 |
|               | 106 ->108 | 0.64818   |           |           |          |              |
|               | 107 ->109 | -0.24432  |           |           |          |              |
| Excited State | 3:        | Singlet-A | 2.4725 eV | 501.46 nm | f=0.0009 | <S**2>=0.000 |
|               | 106 ->108 | 0.21829   |           |           |          |              |
|               | 106 ->109 | -0.18077  |           |           |          |              |
|               | 107 ->109 | 0.63592   |           |           |          |              |
| Excited State | 4:        | Singlet-A | 2.5332 eV | 489.43 nm | f=0.0028 | <S**2>=0.000 |
|               | 103 ->109 | 0.26388   |           |           |          |              |
|               | 106 ->108 | 0.15867   |           |           |          |              |
|               | 106 ->109 | 0.60053   |           |           |          |              |
|               | 107 ->109 | 0.15641   |           |           |          |              |
| Excited State | 5:        | Singlet-A | 2.5997 eV | 476.92 nm | f=0.0031 | <S**2>=0.000 |
|               | 104 ->109 | -0.26762  |           |           |          |              |
|               | 105 ->108 | -0.22573  |           |           |          |              |
|               | 105 ->109 | 0.58638   |           |           |          |              |
| Excited State | 6:        | Singlet-A | 2.7907 eV | 444.28 nm | f=0.0028 | <S**2>=0.000 |
|               | 104 ->108 | -0.13392  |           |           |          |              |
|               | 104 ->109 | 0.53707   |           |           |          |              |
|               | 105 ->108 | -0.40466  |           |           |          |              |
|               | 105 ->109 | 0.10485   |           |           |          |              |
| Excited State | 7:        | Singlet-A | 2.8073 eV | 441.65 nm | f=0.0011 | <S**2>=0.000 |
|               | 104 ->108 | -0.25474  |           |           |          |              |
|               | 104 ->109 | 0.24269   |           |           |          |              |
|               | 105 ->108 | 0.49991   |           |           |          |              |
|               | 105 ->109 | 0.33618   |           |           |          |              |
| Excited State | 8:        | Singlet-A | 2.9927 eV | 414.29 nm | f=0.0058 | <S**2>=0.000 |
|               | 104 ->108 | 0.61311   |           |           |          |              |
|               | 104 ->109 | 0.25202   |           |           |          |              |
|               | 105 ->108 | 0.13258   |           |           |          |              |
|               | 107 ->112 | 0.10580   |           |           |          |              |

|               |           |           |           |           |          |              |
|---------------|-----------|-----------|-----------|-----------|----------|--------------|
| Excited State | 9:        | Singlet-A | 3.1539 eV | 393.12 nm | f=0.0007 | <S**2>=0.000 |
|               | 103 ->108 | 0.69798   |           |           |          |              |
| Excited State | 10:       | Singlet-A | 3.6362 eV | 340.97 nm | f=0.0307 | <S**2>=0.000 |
|               | 103 ->109 | 0.58154   |           |           |          |              |
|               | 106 ->109 | -0.26920  |           |           |          |              |
|               | 107 ->110 | 0.13754   |           |           |          |              |
|               | 107 ->111 | -0.15150  |           |           |          |              |
|               | 107 ->112 | 0.11368   |           |           |          |              |
| Excited State | 11:       | Singlet-A | 3.7702 eV | 328.86 nm | f=0.0111 | <S**2>=0.000 |
|               | 103 ->109 | -0.12042  |           |           |          |              |
|               | 107 ->110 | 0.66918   |           |           |          |              |
|               | 107 ->111 | -0.10610  |           |           |          |              |
| Excited State | 12:       | Singlet-A | 3.8989 eV | 318.00 nm | f=0.0108 | <S**2>=0.000 |
|               | 102 ->108 | 0.60067   |           |           |          |              |
|               | 102 ->109 | -0.11388  |           |           |          |              |
|               | 106 ->110 | 0.23147   |           |           |          |              |
|               | 106 ->111 | -0.16017  |           |           |          |              |
|               | 106 ->112 | 0.11319   |           |           |          |              |
| Excited State | 13:       | Singlet-A | 3.9162 eV | 316.59 nm | f=0.0036 | <S**2>=0.000 |
|               | 102 ->108 | -0.31993  |           |           |          |              |
|               | 106 ->110 | 0.49452   |           |           |          |              |
|               | 106 ->111 | -0.28697  |           |           |          |              |
|               | 106 ->112 | 0.19151   |           |           |          |              |
|               | 106 ->113 | -0.10654  |           |           |          |              |
| Excited State | 14:       | Singlet-A | 3.9898 eV | 310.75 nm | f=0.0008 | <S**2>=0.000 |
|               | 101 ->108 | 0.63700   |           |           |          |              |
|               | 102 ->109 | 0.13276   |           |           |          |              |
|               | 106 ->110 | 0.10991   |           |           |          |              |
|               | 107 ->115 | 0.19599   |           |           |          |              |
| Excited State | 15:       | Singlet-A | 4.0385 eV | 307.00 nm | f=0.0016 | <S**2>=0.000 |
|               | 100 ->109 | -0.10087  |           |           |          |              |
|               | 101 ->108 | -0.16335  |           |           |          |              |
|               | 102 ->109 | 0.24665   |           |           |          |              |
|               | 106 ->110 | 0.39458   |           |           |          |              |
|               | 106 ->111 | 0.30783   |           |           |          |              |
|               | 106 ->112 | -0.26195  |           |           |          |              |
|               | 106 ->113 | 0.14635   |           |           |          |              |

|                   |           |           |           |          |              |  |  |
|-------------------|-----------|-----------|-----------|----------|--------------|--|--|
| 107 ->115         | 0.12658   |           |           |          |              |  |  |
| Excited State 16: | Singlet-A | 4.0546 eV | 305.78 nm | f=0.0498 | <S**2>=0.000 |  |  |
| 106 ->115         | 0.14837   |           |           |          |              |  |  |
| 107 ->110         | 0.13883   |           |           |          |              |  |  |
| 107 ->111         | 0.62989   |           |           |          |              |  |  |
| Excited State 17: | Singlet-A | 4.0828 eV | 303.68 nm | f=0.0030 | <S**2>=0.000 |  |  |
| 100 ->108         | 0.17895   |           |           |          |              |  |  |
| 100 ->109         | -0.21038  |           |           |          |              |  |  |
| 101 ->108         | -0.12682  |           |           |          |              |  |  |
| 102 ->109         | 0.51769   |           |           |          |              |  |  |
| 106 ->110         | -0.13938  |           |           |          |              |  |  |
| 106 ->111         | -0.23096  |           |           |          |              |  |  |
| 106 ->112         | 0.16976   |           |           |          |              |  |  |
| Excited State 18: | Singlet-A | 4.1090 eV | 301.74 nm | f=0.0001 | <S**2>=0.000 |  |  |
| 99 ->108          | -0.16710  |           |           |          |              |  |  |
| 101 ->108         | -0.11845  |           |           |          |              |  |  |
| 102 ->109         | -0.13173  |           |           |          |              |  |  |
| 106 ->111         | -0.12455  |           |           |          |              |  |  |
| 107 ->112         | 0.12756   |           |           |          |              |  |  |
| 107 ->114         | 0.29516   |           |           |          |              |  |  |
| 107 ->115         | 0.50562   |           |           |          |              |  |  |
| Excited State 19: | Singlet-A | 4.1720 eV | 297.18 nm | f=0.0044 | <S**2>=0.000 |  |  |
| 100 ->108         | 0.64752   |           |           |          |              |  |  |
| 100 ->109         | 0.10336   |           |           |          |              |  |  |
| 102 ->109         | -0.13426  |           |           |          |              |  |  |
| Excited State 20: | Singlet-A | 4.2329 eV | 292.90 nm | f=0.0168 | <S**2>=0.000 |  |  |
| 105 ->110         | 0.35518   |           |           |          |              |  |  |
| 105 ->111         | -0.25016  |           |           |          |              |  |  |
| 105 ->112         | 0.14153   |           |           |          |              |  |  |
| 106 ->114         | -0.10387  |           |           |          |              |  |  |
| 106 ->115         | -0.13552  |           |           |          |              |  |  |
| 107 ->111         | 0.10370   |           |           |          |              |  |  |
| 107 ->112         | 0.36268   |           |           |          |              |  |  |
| 107 ->113         | -0.13230  |           |           |          |              |  |  |
| 107 ->115         | -0.19735  |           |           |          |              |  |  |



### First 20 Excited States for 2-Hf as Predicted by TDDFT Using PW91PW91

|               |           |           |           |           |          |              |
|---------------|-----------|-----------|-----------|-----------|----------|--------------|
| Excited State | 1:        | Singlet-A | 2.0081 eV | 617.43 nm | f=0.0005 | <S**2>=0.000 |
|               | 107 ->108 | 0.70256   |           |           |          |              |
| Excited State | 2:        | Singlet-A | 2.1266 eV | 583.02 nm | f=0.0001 | <S**2>=0.000 |
|               | 106 ->108 | 0.68780   |           |           |          |              |
|               | 107 ->109 | -0.12422  |           |           |          |              |
| Excited State | 3:        | Singlet-A | 2.3531 eV | 526.91 nm | f=0.0009 | <S**2>=0.000 |
|               | 106 ->108 | 0.13352   |           |           |          |              |
|               | 107 ->109 | 0.68150   |           |           |          |              |
| Excited State | 4:        | Singlet-A | 2.4323 eV | 509.75 nm | f=0.0027 | <S**2>=0.000 |
|               | 104 ->108 | -0.10122  |           |           |          |              |
|               | 105 ->108 | 0.69466   |           |           |          |              |
| Excited State | 5:        | Singlet-A | 2.4863 eV | 498.67 nm | f=0.0051 | <S**2>=0.000 |
|               | 106 ->109 | 0.69039   |           |           |          |              |
| Excited State | 6:        | Singlet-A | 2.6729 eV | 463.86 nm | f=0.0028 | <S**2>=0.000 |
|               | 104 ->109 | -0.13966  |           |           |          |              |
|               | 105 ->109 | 0.68577   |           |           |          |              |
| Excited State | 7:        | Singlet-A | 2.8636 eV | 432.97 nm | f=0.0087 | <S**2>=0.000 |
|               | 104 ->108 | 0.63846   |           |           |          |              |
|               | 104 ->109 | -0.19259  |           |           |          |              |
|               | 107 ->111 | -0.12640  |           |           |          |              |
| Excited State | 8:        | Singlet-A | 2.8835 eV | 429.98 nm | f=0.0009 | <S**2>=0.000 |
|               | 103 ->108 | 0.68417   |           |           |          |              |
|               | 104 ->109 | -0.11810  |           |           |          |              |
| Excited State | 9:        | Singlet-A | 2.9370 eV | 422.14 nm | f=0.0013 | <S**2>=0.000 |
|               | 103 ->108 | 0.13524   |           |           |          |              |
|               | 104 ->108 | 0.17186   |           |           |          |              |
|               | 104 ->109 | 0.64890   |           |           |          |              |
|               | 105 ->109 | 0.11999   |           |           |          |              |
| Excited State | 10:       | Singlet-A | 3.2032 eV | 387.06 nm | f=0.0019 | <S**2>=0.000 |
|               | 107 ->110 | 0.69553   |           |           |          |              |
| Excited State | 11:       | Singlet-A | 3.2989 eV | 375.84 nm | f=0.0004 | <S**2>=0.000 |

|                   |           |           |           |          |              |  |  |
|-------------------|-----------|-----------|-----------|----------|--------------|--|--|
| 106 ->110         | 0.70582   |           |           |          |              |  |  |
| Excited State 12: | Singlet-A | 3.3605 eV | 368.94 nm | f=0.0251 | <S**2>=0.000 |  |  |
| 101 ->109         | 0.15150   |           |           |          |              |  |  |
| 103 ->109         | 0.61957   |           |           |          |              |  |  |
| 107 ->111         | -0.25212  |           |           |          |              |  |  |
| Excited State 13: | Singlet-A | 3.5712 eV | 347.18 nm | f=0.0044 | <S**2>=0.000 |  |  |
| 102 ->108         | 0.62944   |           |           |          |              |  |  |
| 105 ->110         | -0.12836  |           |           |          |              |  |  |
| 107 ->111         | 0.20701   |           |           |          |              |  |  |
| 107 ->112         | 0.12846   |           |           |          |              |  |  |
| Excited State 14: | Singlet-A | 3.5859 eV | 345.76 nm | f=0.0217 | <S**2>=0.000 |  |  |
| 102 ->108         | -0.19154  |           |           |          |              |  |  |
| 105 ->110         | -0.22307  |           |           |          |              |  |  |
| 106 ->111         | 0.46149   |           |           |          |              |  |  |
| 107 ->111         | 0.33666   |           |           |          |              |  |  |
| 107 ->112         | 0.24345   |           |           |          |              |  |  |
| Excited State 15: | Singlet-A | 3.6002 eV | 344.38 nm | f=0.0014 | <S**2>=0.000 |  |  |
| 102 ->108         | 0.11179   |           |           |          |              |  |  |
| 105 ->110         | 0.63246   |           |           |          |              |  |  |
| 106 ->111         | 0.26930   |           |           |          |              |  |  |
| Excited State 16: | Singlet-A | 3.6160 eV | 342.88 nm | f=0.0191 | <S**2>=0.000 |  |  |
| 102 ->108         | 0.19535   |           |           |          |              |  |  |
| 105 ->110         | -0.16945  |           |           |          |              |  |  |
| 106 ->111         | 0.42713   |           |           |          |              |  |  |
| 107 ->111         | -0.31051  |           |           |          |              |  |  |
| 107 ->112         | -0.34527  |           |           |          |              |  |  |
| Excited State 17: | Singlet-A | 3.7536 eV | 330.31 nm | f=0.0044 | <S**2>=0.000 |  |  |
| 102 ->109         | 0.67665   |           |           |          |              |  |  |
| 107 ->112         | -0.11488  |           |           |          |              |  |  |
| Excited State 18: | Singlet-A | 3.8064 eV | 325.73 nm | f=0.0108 | <S**2>=0.000 |  |  |
| 101 ->108         | 0.55000   |           |           |          |              |  |  |
| 107 ->111         | -0.17445  |           |           |          |              |  |  |
| 107 ->112         | 0.31802   |           |           |          |              |  |  |
| 107 ->113         | 0.16235   |           |           |          |              |  |  |
| Excited State 19: | Singlet-A | 3.8231 eV | 324.30 nm | f=0.0134 | <S**2>=0.000 |  |  |

|           |          |
|-----------|----------|
| 101 ->108 | -0.24266 |
| 101 ->109 | -0.13761 |
| 102 ->109 | 0.14400  |
| 106 ->112 | 0.47988  |
| 107 ->111 | -0.17059 |
| 107 ->112 | 0.28753  |
| 107 ->113 | 0.16209  |

Excited State 20: Singlet-A 3.8371 eV 323.12 nm f=0.0092 <S\*\*2>=0.000

|           |          |
|-----------|----------|
| 101 ->108 | 0.33472  |
| 101 ->109 | 0.12707  |
| 105 ->111 | -0.11813 |
| 106 ->111 | -0.10895 |
| 106 ->112 | 0.48011  |
| 107 ->111 | 0.13416  |
| 107 ->112 | -0.20298 |
| 107 ->113 | -0.17970 |

### First 20 Excited States for 2-Hf as Predicted by TDDFT Using B3LYP

|               |    |           |           |           |          |              |
|---------------|----|-----------|-----------|-----------|----------|--------------|
| Excited State | 1: | Singlet-A | 2.3167 eV | 535.18 nm | f=0.0030 | <S**2>=0.000 |
| 107 ->108     |    | 0.69177   |           |           |          |              |
| Excited State | 2: | Singlet-A | 2.4497 eV | 506.12 nm | f=0.0005 | <S**2>=0.000 |
| 103 ->109     |    | 0.10480   |           |           |          |              |
| 106 ->108     |    | -0.33998  |           |           |          |              |
| 106 ->109     |    | 0.14689   |           |           |          |              |
| 107 ->109     |    | 0.57584   |           |           |          |              |
| Excited State | 3: | Singlet-A | 2.4894 eV | 498.05 nm | f=0.0025 | <S**2>=0.000 |
| 103 ->109     |    | 0.26086   |           |           |          |              |
| 106 ->109     |    | 0.60195   |           |           |          |              |
| 107 ->109     |    | -0.22745  |           |           |          |              |
| Excited State | 4: | Singlet-A | 2.5740 eV | 481.68 nm | f=0.0011 | <S**2>=0.000 |
| 104 ->109     |    | -0.21416  |           |           |          |              |
| 105 ->109     |    | 0.51781   |           |           |          |              |
| 106 ->108     |    | 0.31918   |           |           |          |              |
| 106 ->109     |    | 0.10704   |           |           |          |              |
| 107 ->109     |    | 0.21680   |           |           |          |              |
| Excited State | 5: | Singlet-A | 2.5994 eV | 476.97 nm | f=0.0025 | <S**2>=0.000 |
| 105 ->109     |    | -0.38333  |           |           |          |              |
| 106 ->108     |    | 0.51637   |           |           |          |              |
| 107 ->109     |    | 0.24227   |           |           |          |              |
| Excited State | 6: | Singlet-A | 2.8220 eV | 439.34 nm | f=0.0001 | <S**2>=0.000 |
| 104 ->108     |    | -0.12250  |           |           |          |              |
| 104 ->109     |    | 0.64292   |           |           |          |              |
| 105 ->109     |    | 0.21798   |           |           |          |              |
| Excited State | 7: | Singlet-A | 2.9693 eV | 417.55 nm | f=0.0032 | <S**2>=0.000 |
| 104 ->108     |    | -0.14536  |           |           |          |              |
| 105 ->108     |    | 0.66998   |           |           |          |              |
| 105 ->109     |    | 0.12301   |           |           |          |              |
| Excited State | 8: | Singlet-A | 3.2085 eV | 386.42 nm | f=0.0085 | <S**2>=0.000 |
| 104 ->108     |    | 0.64916   |           |           |          |              |
| 104 ->109     |    | 0.12499   |           |           |          |              |
| 105 ->108     |    | 0.13260   |           |           |          |              |
| 107 ->112     |    | 0.12889   |           |           |          |              |

|               |           |           |           |           |          |              |
|---------------|-----------|-----------|-----------|-----------|----------|--------------|
| Excited State | 9:        | Singlet-A | 3.3210 eV | 373.34 nm | f=0.0004 | <S**2>=0.000 |
|               | 103 ->108 | 0.69828   |           |           |          |              |
| Excited State | 10:       | Singlet-A | 3.6559 eV | 339.13 nm | f=0.0458 | <S**2>=0.000 |
|               | 103 ->109 | 0.59616   |           |           |          |              |
|               | 106 ->109 | -0.27563  |           |           |          |              |
|               | 107 ->111 | -0.13409  |           |           |          |              |
|               | 107 ->112 | 0.12655   |           |           |          |              |
| Excited State | 11:       | Singlet-A | 3.8097 eV | 325.44 nm | f=0.0072 | <S**2>=0.000 |
|               | 107 ->110 | 0.67847   |           |           |          |              |
|               | 107 ->111 | 0.13836   |           |           |          |              |
| Excited State | 12:       | Singlet-A | 3.9540 eV | 313.56 nm | f=0.0007 | <S**2>=0.000 |
|               | 102 ->109 | 0.11172   |           |           |          |              |
|               | 106 ->110 | 0.65188   |           |           |          |              |
|               | 106 ->111 | 0.21113   |           |           |          |              |
| Excited State | 13:       | Singlet-A | 4.0254 eV | 308.01 nm | f=0.0017 | <S**2>=0.000 |
|               | 100 ->109 | -0.19499  |           |           |          |              |
|               | 102 ->108 | -0.20443  |           |           |          |              |
|               | 102 ->109 | 0.59630   |           |           |          |              |
|               | 106 ->110 | -0.16566  |           |           |          |              |
| Excited State | 14:       | Singlet-A | 4.1251 eV | 300.56 nm | f=0.0072 | <S**2>=0.000 |
|               | 102 ->108 | 0.38419   |           |           |          |              |
|               | 106 ->110 | -0.13497  |           |           |          |              |
|               | 106 ->111 | 0.34572   |           |           |          |              |
|               | 106 ->112 | -0.26456  |           |           |          |              |
|               | 107 ->111 | 0.31638   |           |           |          |              |
| Excited State | 15:       | Singlet-A | 4.1347 eV | 299.86 nm | f=0.0046 | <S**2>=0.000 |
|               | 102 ->108 | 0.46001   |           |           |          |              |
|               | 102 ->109 | 0.23936   |           |           |          |              |
|               | 106 ->110 | 0.13185   |           |           |          |              |
|               | 106 ->111 | -0.32955  |           |           |          |              |
|               | 106 ->112 | 0.25488   |           |           |          |              |
| Excited State | 16:       | Singlet-A | 4.1562 eV | 298.31 nm | f=0.0474 | <S**2>=0.000 |
|               | 101 ->108 | -0.11305  |           |           |          |              |
|               | 102 ->108 | -0.24976  |           |           |          |              |
|               | 106 ->111 | -0.16524  |           |           |          |              |

|                   |           |           |           |          |              |  |  |
|-------------------|-----------|-----------|-----------|----------|--------------|--|--|
| 106 ->112         | 0.11842   |           |           |          |              |  |  |
| 107 ->110         | -0.12442  |           |           |          |              |  |  |
| 107 ->111         | 0.56365   |           |           |          |              |  |  |
| Excited State 17: | Singlet-A | 4.1933 eV | 295.67 nm | f=0.0019 | <S**2>=0.000 |  |  |
| 101 ->108         | 0.67730   |           |           |          |              |  |  |
| Excited State 18: | Singlet-A | 4.2971 eV | 288.53 nm | f=0.0063 | <S**2>=0.000 |  |  |
| 101 ->109         | 0.10301   |           |           |          |              |  |  |
| 105 ->110         | 0.61149   |           |           |          |              |  |  |
| 105 ->111         | 0.28187   |           |           |          |              |  |  |
| 107 ->112         | -0.13130  |           |           |          |              |  |  |
| Excited State 19: | Singlet-A | 4.3955 eV | 282.07 nm | f=0.0126 | <S**2>=0.000 |  |  |
| 100 ->108         | 0.26634   |           |           |          |              |  |  |
| 101 ->109         | -0.25536  |           |           |          |              |  |  |
| 105 ->110         | 0.13995   |           |           |          |              |  |  |
| 106 ->115         | -0.23070  |           |           |          |              |  |  |
| 107 ->112         | 0.48813   |           |           |          |              |  |  |
| Excited State 20: | Singlet-A | 4.4277 eV | 280.02 nm | f=0.0065 | <S**2>=0.000 |  |  |
| 99 ->108          | 0.21746   |           |           |          |              |  |  |
| 100 ->108         | 0.45435   |           |           |          |              |  |  |
| 104 ->110         | -0.13203  |           |           |          |              |  |  |
| 106 ->111         | 0.23066   |           |           |          |              |  |  |
| 106 ->112         | 0.25075   |           |           |          |              |  |  |
| 107 ->112         | -0.11107  |           |           |          |              |  |  |
| 107 ->115         | -0.21860  |           |           |          |              |  |  |

## References:

1. D. F. Shriver and M. A. Drezdon, John Wiley & Sons, New York, 2nd edn., 1986, p. 326.
2. B. J. Burger and J. E. Bercaw, in *Experimental Organometallic Chemistry*, eds. A. L. Wayda and M. Y. Darensbourg, American Chemical Society, Washington, DC, 1987, p. 79-98.
3. A. B. Pangborn, M. A. Giardello, R. H. Grubbs, R. K. Rosen and F. J. Timmers, *Organometallics*, 1996, **15**, 1518-1520.
4. D. S. Glueck, J. Wu, F. J. Hollander and R. G. Bergman, *J. Am. Chem. Soc.*, 1991, **113**, 2041-2054.
5. D. S. Glueck, F. J. Hollander and R. G. Bergman, *J. Am. Chem. Soc.*, 1989, **111**, 2719-2721.
6. A. M. Baranger and R. G. Bergman, *J. Am. Chem. Soc.*, 1994, **116**, 3822-3835.
7. A. M. Baranger, F. J. Hollander and R. G. Bergman, *J. Am. Chem. Soc.*, 1993, **115**, 7890-7891.
8. V. V. Burlakov, T. Beweries, V. S. Bogdanov, P. Arndt, W. Baumann, P. V. Petrovskii, A. Spannenberg, K. A. Lyssenko, V. B. Shur and U. Rosenthal, *Organometallics*, 2009, **28**, 2864-2870.
9. P. Binger, P. Müller, F. Langhauser, F. Sandmeyer, P. Philipps, B. Gabor and R. Mynott, *Chem. Ber.*, 1993, **126**, 1541-1550.
10. P. A. S. Smith and J. H. Boyer, *Organic Syntheses*, **31**, 14-17.
11. G. Sheldrick, *Acta Crystallographica Section A*, 2008, **A64**, 112-122.
12. R. R. Schrock, L. G. Sturgeooff and P. R. Sharp, *Inorg. Chem.*, 1983, **22**, 2801-2806.
13. Z.-W. Li, A. Yeh and H. Taube, *Inorg. Chem.*, 1994, **33**, 2874-2881.
14. J. C. Peters, J.-P. F. Cherry, J. C. Thomas, L. Baraldo, D. J. Mindiola, W. M. Davis and C. C. Cummins, *J. Am. Chem. Soc.*, 1999, **121**, 10053-10067.
15. R. R. Schrock, R. M. Kolodziej, A. H. Liu, W. M. Davis and M. G. Vale, *J. Am. Chem. Soc.*, 1990, **112**, 4338-4345.
16. R. Cordone, W. D. Harman and H. Taube, *J. Am. Chem. Soc.*, 1989, **111**, 2896-2900.
17. M. J. Frisch, G. W. Trucks and H. B. Schlegel, et al., Gaussian, Inc., Wallingford, CT, 2009.
18. T. H. Dunning Jr. and P. J. Hay, in *Modern Theoretical Chemistry*, ed. H. F. S. III, Plenum, New York, 1976, vol. 3, p. 1-28
19. D. Andrae, U. Haeussermann, M. Dolg, H. Stoll and H. Preuss, *Theor. Chem. Acc.*, 1990, **77**, 123-141.
20. U. Wedig, M. Dolg, H. Stoll and H. Preuss, in *Quantum Chemistry: The Challenge of Transition Metals and Coordination Chemistry*, ed. A. Veillard, Springer, 1986, p. 79-90.
21. G. A. Petersson, A. Bennett, T. G. Tensfeldt, M. A. Al-Laham, W. A. Shirley and J. Mantzaris, *J. Chem. Phys.*, 1988, **89**, 2193-2218.
22. G. A. Petersson and M. A. Al-Laham, *J. Chem. Phys.*, 1991, **94**, 6081-6090.
23. A. D. Becke, *J. Chem. Phys.*, 1993, **98**, 5648-5652.
24. A. D. Becke, *Phys. Rev. A: At. Mol. Opt. Phys.*, 1988, **38**, 3098-3100.
25. C. Lee, W. Yang and R. G. Parr, *Phys. Rev. B: Condens. Matter*, 1988, **37**, 785-789.
26. B. Miehlich, A. Savin, H. Stoll and H. Preuss, *Chem. Phys. Lett.*, 1989, **157**, 200-206.
27. J. P. Perdew, eds. P. Ziesche and H. Eschrig, Akademie Verlag, Berlin, 1991, p. 11.
28. J. P. Perdew, J. A. Chevary, S. H. Vosko, K. A. Jackson, M. R. Pederson, D. J. Singh and C. Fiolhais, *Phys. Rev. B: Condens. Matter*, 1992, **46**, 6671-6687.

29. J. P. Perdew, J. A. Chevary, S. H. Vosko, K. A. Jackson, M. R. Pederson, D. J. Singh and C. Fiolhais, *Phys. Rev. B: Condens. Matter*, 1993, **48**, 4978.
30. J. P. Perdew, K. Burke and Y. Wang, *Phys. Rev. B: Condens. Matter*, 1996, 16533-16539.
31. K. Burke, J. P. Perdew and Y. Wang, in *Electronic Density Functional Theory: Recent Progress and New Directions*, eds. J. F. Dobson, G. Vignale and M. P. Das, Plenum, New York, 1998.
32. R. Bauernschmitt and R. Ahlrichs, *Chem. Phys. Lett.*, 1996, **256**, 454-464.
33. C. V. Caillie and R. D. Amos, *Chem. Phys. Lett.*, 2000, **317**, 159-164.
34. M. E. Casida, C. Jamorski, K. C. Casida and D. R. Salahub, *J. Chem. Phys.*, 1998, **108**, 4439-4449.
35. F. Furche and R. Ahlrichs, *J. Chem. Phys.*, 2002, **117**, 7433-7447.
36. H. B. Schlegel, S. S. Iyengar, J. M. M. X. Li, G. A. Voth, G. E. Scuseria and M. J. Frisch, *J. Chem. Phys.*, 2002, **117**, 8694-8704.
37. G. W. T. J. R. Cheeseman, T. A. Keith, and M. J. Frisch, *J. Chem. Phys.*, 1996, **104**, 5497-5509.
38. F. London, *J. Phys. Radium*, 1937, **8**, 397-409.
39. R. McWeeny, *Phys. Rev.*, 1962, **126** 1028.
40. R. Ditchfield, *Mol. Phys.*, 1974, **27**, 789-807.
41. K. Wolinski, J. F. Hilton and P. Pulay, *J. Am. Chem. Soc.*, 1990, **112**, 8251-8260.
42. J. Gauss, *Chem. Phys. Lett.*, 1992, **191**, 614-620.
43. J. Gauss, *J. Chem. Phys.*, 1993, **99**, 3629-3643.
44. J. Gauss, *PCCP*, 1995, **99**, 1001-1008.
